# Supplementary material for: Stabilization of Si(0) and Ge(0) compounds by different silylenes and germylenes: a density functional and molecular electrostatic study
Source: Royal Society of Chemistry journal article supplement (doi:10.1039/c3dt50926e), 2013-01-01
Supplement: c3dt50926e.pdf [file c3dt50926e.pdf]

# Supporting Information of

## **Stabilization of Si(0) and Ge(0) Compounds by Different Silylenes and Germylenes: A Density Functional and Molecular Electrostatic Study**

Satyajit Sarmah,<sup>a</sup> Ankur Kanti Guha,<sup>a</sup> and Ashwini K. Phukan\*<sup>a</sup>  
Anmol Kumar<sup>b</sup> and Shridhar R. Gadre\*<sup>b</sup>

<sup>a</sup> Department of Chemical Sciences, Tezpur University, Tezpur - 784028, Assam, India

E-mail : [ashwini@tezu.ernet.in](mailto:ashwini@tezu.ernet.in)

<sup>b</sup> Department of Chemistry, IIT Kanpur, Kanpur 208016, India

E-mail : [gadre@iitk.ac.in](mailto:gadre@iitk.ac.in)

**Table S1.** BP86/TZVP calculated singlet-triplet ( $\Delta E_{S-T}$ , kcal/mol) gap of **1Si- 5Si** and **6Ge- 10Ge**.

| <b>Molecule</b>             | <b><math>\Delta E_{S-T}</math></b> |
|-----------------------------|------------------------------------|
| <b>1Si</b>                  | 20.5                               |
| <b>2Si</b>                  | 11.8                               |
| <b>3Si</b>                  | 16.3                               |
| <b>4Si(H)</b>               | 30.1                               |
| <b>4Si(Me)</b>              | 32.0                               |
| <b>4Si(Cl)</b>              | 22.6                               |
| <b>4Si(NMe<sub>2</sub>)</b> | 27.0                               |
| <b>4Si(PMe<sub>2</sub>)</b> | 19.3                               |
| <b>5Si(H)</b>               | -9.7                               |
| <b>5Si(Me)</b>              | 20.8                               |
| <b>6Ge</b>                  | 8.9                                |
| <b>7Ge</b>                  | 14.0                               |
| <b>8Ge</b>                  | 11.5                               |
| <b>9Ge(H)</b>               | 25.9                               |
| <b>9Ge(Me)</b>              | 22.8                               |
| <b>9Ge(Cl)</b>              | -1.3                               |
| <b>9Ge(NMe<sub>2</sub>)</b> | 10.0                               |
| <b>9Ge(PMe<sub>2</sub>)</b> | 14.9                               |
| <b>10Ge(H)</b>              | 13.4                               |
| <b>10Ge(Me)</b>             | 11.8                               |

**Table S2.** BP86/TZVP calculated NBO occupancies of the highest occupied  $\sigma$  and  $\pi$  symmetric orbitals at the central Si or Ge atom of **1Si- 5Si** and **6Ge- 10Ge** respectively. Occupancies of the NBO enforced lone pairs at the central atom (Si or Ge) are given within parenthesis.

| <b>Molecule</b>             | <b><math>\sigma</math></b> | <b><math>\pi</math></b> |
|-----------------------------|----------------------------|-------------------------|
| <b>1Si</b>                  | 1.780                      | 1.218                   |
| <b>2Si</b>                  | (1.619)                    | (0.966)                 |
| <b>3Si</b>                  | 1.771                      | 1.140                   |
| <b>4Si(H)</b>               | 1.867                      | 1.041                   |
| <b>4Si(Me)</b>              | 1.822                      | 1.157                   |
| <b>4Si(Cl)</b>              | 1.764                      | 1.221                   |
| <b>4Si(NMe<sub>2</sub>)</b> | 1.799                      | 1.262                   |
| <b>4Si(PMe<sub>2</sub>)</b> | 1.773                      | 1.133                   |
| <b>5Si(H)</b>               | 1.813                      | 1.049                   |
| <b>5Si(Me)</b>              | 1.811                      | 1.139                   |
| <b>6Ge</b>                  | 1.849                      | 1.238                   |
| <b>7Ge</b>                  | (1.746)                    | (0.943)                 |
| <b>8Ge</b>                  | 1.841                      | 1.155                   |
| <b>9Ge(H)</b>               | 1.905                      | 1.054                   |
| <b>9Ge(Me)</b>              | 1.869                      | 1.137                   |
| <b>9Ge(Cl)</b>              | 1.833                      | 1.248                   |
| <b>9Ge(NMe<sub>2</sub>)</b> | 1.853                      | 1.274                   |
| <b>9Ge(PMe<sub>2</sub>)</b> | 1.841                      | 1.110                   |
| <b>10Ge(H)</b>              | 1.875                      | 1.067                   |
| <b>10Ge(Me)</b>             | 1.875                      | 1.177                   |

**Table S3.** BP86/TZVP calculated the B-H distances (Å) of **1Si-BH<sub>3</sub>-5Si-BH<sub>3</sub>** and **6Ge-BH<sub>3</sub>-10Ge-BH<sub>3</sub>** complexes.

| <b>Complex</b>                             | <b>B-H<sub>1</sub>, B-H<sub>2</sub>, B-H<sub>3</sub></b> |
|--------------------------------------------|----------------------------------------------------------|
| <b>1Si-BH<sub>3</sub></b>                  | 1.218, 1.221, 1.221                                      |
| <b>2Si-BH<sub>3</sub></b>                  | 1.217, 1.211, 1.214                                      |
| <b>3Si-BH<sub>3</sub></b>                  | 1.221, 1.224, 1.216                                      |
| <b>4SiH-BH<sub>3</sub></b>                 | 1.225, 1.224, 1.220                                      |
| <b>4Si(Me)-BH<sub>3</sub></b>              | 1.229, 1.223, 1.231                                      |
| <b>4Si(Cl)-BH<sub>3</sub></b>              | 1.225, 1.224, 1.226                                      |
| <b>4Si(NMe<sub>2</sub>)-BH<sub>3</sub></b> | 1.230, 1.225, 1.232                                      |
| <b>4Si(PMe<sub>2</sub>)-BH<sub>3</sub></b> | 1.225, 1.227, 1.226                                      |
| <b>5Si(H)-BH<sub>3</sub></b>               | 1.220, 1.227, 1.231                                      |
| <b>5Si(Me)-BH<sub>3</sub></b>              | 1.229, 1.224, 1.231                                      |
| <b>6Ge-BH<sub>3</sub></b>                  | 1.227, 1.227, 1.220                                      |
| <b>7Ge-BH<sub>3</sub></b>                  | 1.209, 1.302, 1.205                                      |
| <b>8Ge-BH<sub>3</sub></b>                  | 1.222, 1.222, 1.210                                      |
| <b>9Ge(H)-BH<sub>3</sub></b>               | 1.220, 1.218, 1.222                                      |
| <b>9Ge(Me)-BH<sub>3</sub></b>              | 1.220, 1.223, 1.223                                      |
| <b>9Ge(Cl)-BH<sub>3</sub></b>              | 1.222, 1.224, 1.225                                      |
| <b>9Ge(NMe<sub>2</sub>)-BH<sub>3</sub></b> | 1.226, 1.226, 1.225                                      |
| <b>9Ge(PMe<sub>2</sub>)-BH<sub>3</sub></b> | 1.217, 1.213, 1.261                                      |
| <b>10Ge(H)-BH<sub>3</sub></b>              | 1.220, 1.236, 1.224                                      |
| <b>10Ge(Me)-BH<sub>3</sub></b>             | 1.228, 1.224, 1.232                                      |

**Table S4.** BP86/TZVP calculated the B-H distances (Å) of **1Si-(BH<sub>3</sub>)<sub>2</sub>–5Si-(BH<sub>3</sub>)<sub>2</sub>, 6Ge-(BH<sub>3</sub>)<sub>2</sub>–10Ge-(BH<sub>3</sub>)<sub>2</sub>** complexes.

| <b>Complex</b>                                           | <b>First BH<sub>3</sub> group<br/>B-H<sub>1</sub>, B-H<sub>2</sub>, B-H<sub>3</sub></b> | <b>Second BH<sub>3</sub> group<br/>B-H<sub>1</sub>, B-H<sub>2</sub>, B-H<sub>3</sub></b> |
|----------------------------------------------------------|-----------------------------------------------------------------------------------------|------------------------------------------------------------------------------------------|
| <b>1Si-(BH<sub>3</sub>)<sub>2</sub></b>                  | 1.221, 1.221, 1.221                                                                     | 1.221, 1.221, 1.221                                                                      |
| <b>2Si-(BH<sub>3</sub>)<sub>2</sub></b>                  | 1.217, 1.214, 1.222                                                                     | 1.208, 1.207, 1.326                                                                      |
| <b>3Si-(BH<sub>3</sub>)<sub>2</sub></b>                  | 1.221, 1.221, 1.214                                                                     | 1.221, 1.214, 1.221                                                                      |
| <b>4Si(H)-(BH<sub>3</sub>)<sub>2</sub></b>               | 1.222, 1.223, 1.219                                                                     | 1.215, 1.215, 1.274                                                                      |
| <b>4Si(Me)-(BH<sub>3</sub>)<sub>2</sub></b>              | 1.230, 1.229, 1.225                                                                     | 1.227, 1.231, 1.225                                                                      |
| <b>4Si(Cl)-(BH<sub>3</sub>)<sub>2</sub></b>              | 1.221, 1.227, 1.223                                                                     | 1.221, 1.227, 1.223                                                                      |
| <b>4Si(NMe<sub>2</sub>)-(BH<sub>3</sub>)<sub>2</sub></b> | 1.229, 1.223, 1.232                                                                     | 1.225, 1.223, 1.226                                                                      |
| <b>4Si(PMe<sub>2</sub>)-(BH<sub>3</sub>)<sub>2</sub></b> | 1.226, 1.229, 1.226                                                                     | 1.225, 1.225, 1.225                                                                      |
| <b>5Si(H)-(BH<sub>3</sub>)<sub>2</sub></b>               | 1.219, 1.227, 1.236                                                                     | 1.220, 1.237, 1.233                                                                      |
| <b>5Si(Me)-(BH<sub>3</sub>)<sub>2</sub></b>              | 1.229, 1.231, 1.225                                                                     | 1.229, 1.225, 1.229                                                                      |
| <b>6Ge-(BH<sub>3</sub>)<sub>2</sub></b>                  | 1.222, 1.222, 1.220                                                                     | 1.220, 1.222, 1.222                                                                      |
| <b>7Ge-(BH<sub>3</sub>)<sub>2</sub></b>                  | 1.207, 1.315, 1.204                                                                     | 1.204, 1.207, 1.314                                                                      |
| <b>8Ge-(BH<sub>3</sub>)<sub>2</sub></b>                  | 1.224, 1.219, 1.214                                                                     | 1.214, 1.223, 1.220                                                                      |
| <b>9Ge(H)-(BH<sub>3</sub>)<sub>2</sub></b>               | 1.215, 1.220, 1.220                                                                     | 1.216, 1.233, 1.232                                                                      |
| <b>9Ge(Me)-(BH<sub>3</sub>)<sub>2</sub></b>              | 1.222, 1.223, 1.223                                                                     | 1.222, 1.223, 1.223                                                                      |
| <b>9Ge(Cl)-(BH<sub>3</sub>)<sub>2</sub></b>              | 1.224, 1.222, 1.216                                                                     | 1.216, 1.224, 1.222                                                                      |
| <b>9Ge(NMe<sub>2</sub>)-(BH<sub>3</sub>)<sub>2</sub></b> | 1.224, 1.223, 1.223                                                                     | 1.220, 1.221, 1.225                                                                      |
| <b>9Ge(PMe<sub>2</sub>)-(BH<sub>3</sub>)<sub>2</sub></b> | 1.224, 1.223, 1.220                                                                     | 1.222, 1.224, 1.222                                                                      |
| <b>10Ge(H)-(BH<sub>3</sub>)<sub>2</sub></b>              | 1.221, 1.221, 1.240                                                                     | 1.240, 1.221, 1.221                                                                      |
| <b>10Ge(Me)-(BH<sub>3</sub>)<sub>2</sub></b>             | 1.227, 1.221, 1.228                                                                     | 1.228, 1.221, 1.226                                                                      |

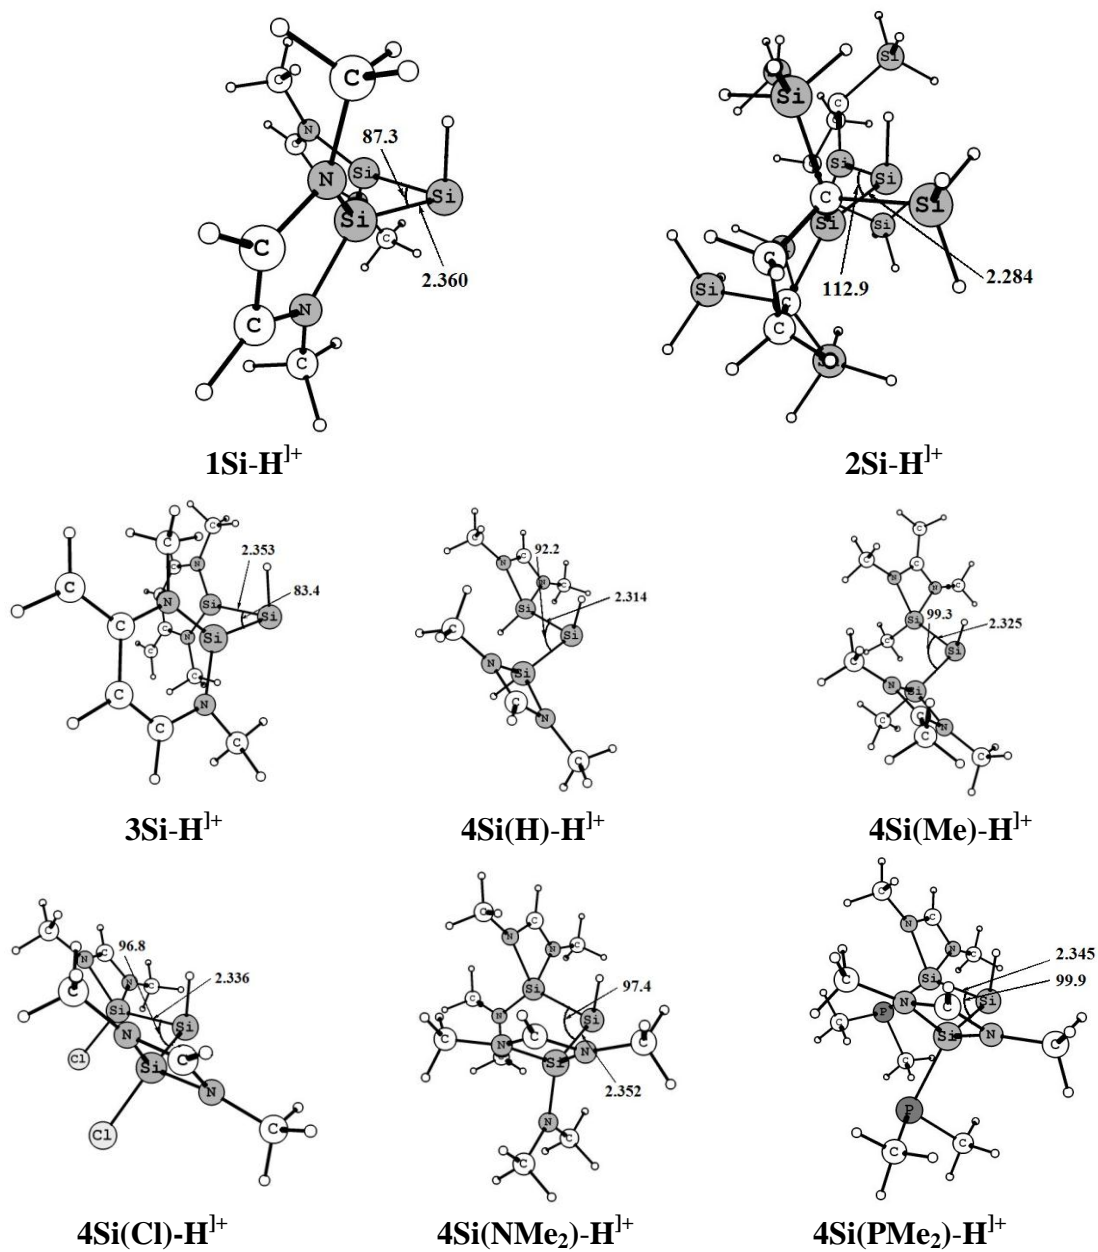

**Fig. S1.** Optimized geometries of singly protonated species **1Si-H<sup>1+</sup>-5Si-H<sup>1+</sup>** and **6Ge-H<sup>1+</sup>-10Ge-H<sup>1+</sup>**. Bond lengths are in Å and angles in degrees.

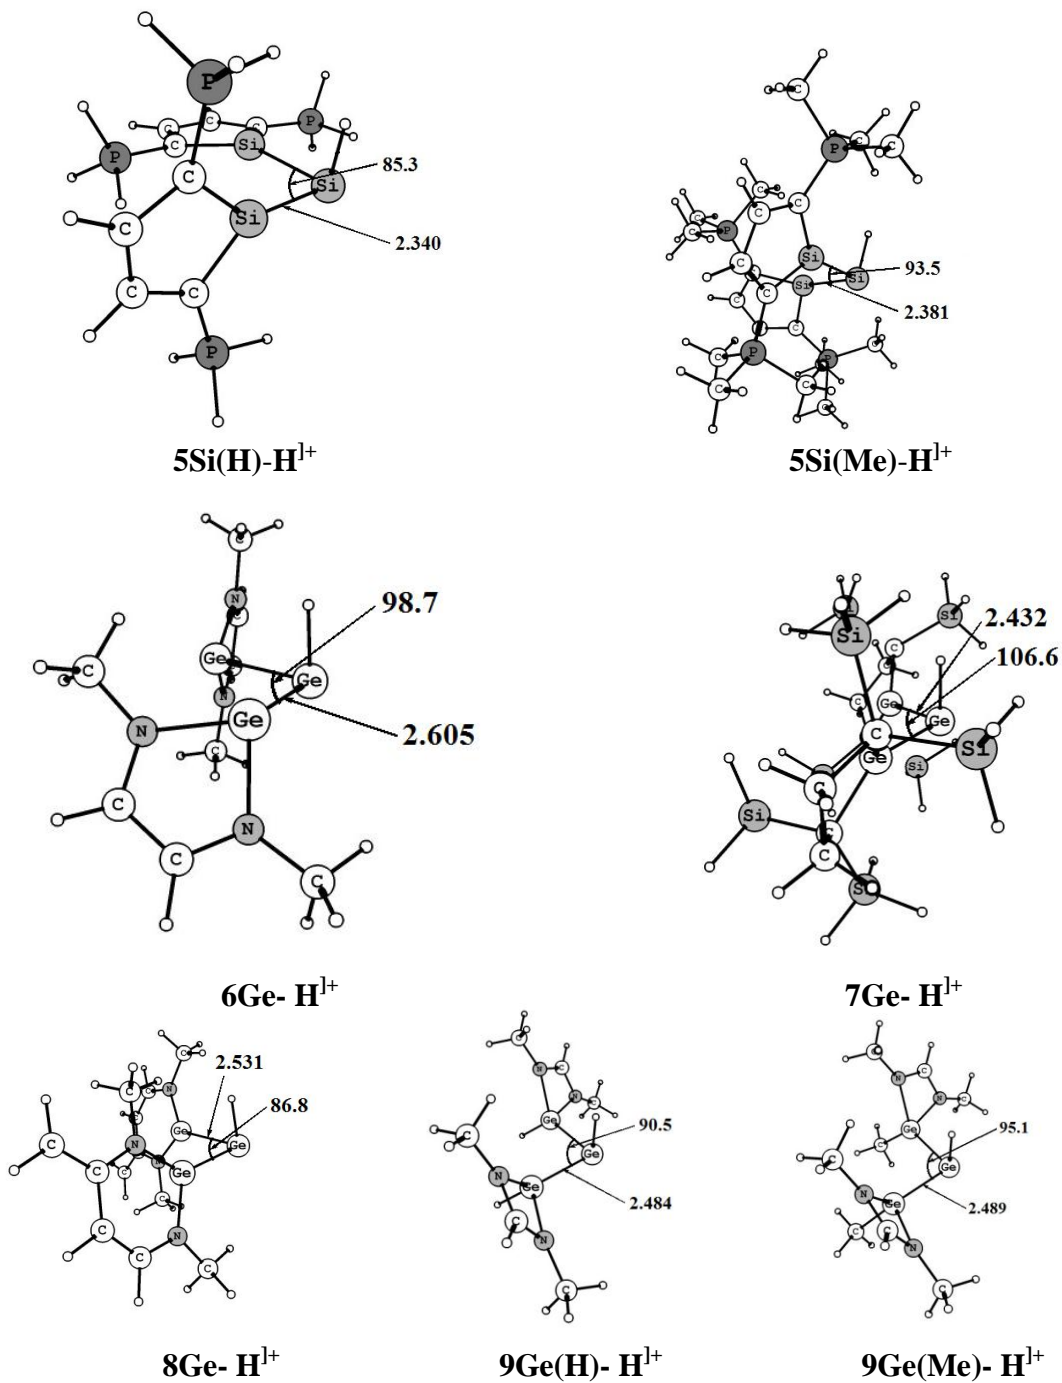

**Fig. S1.** (Continued).

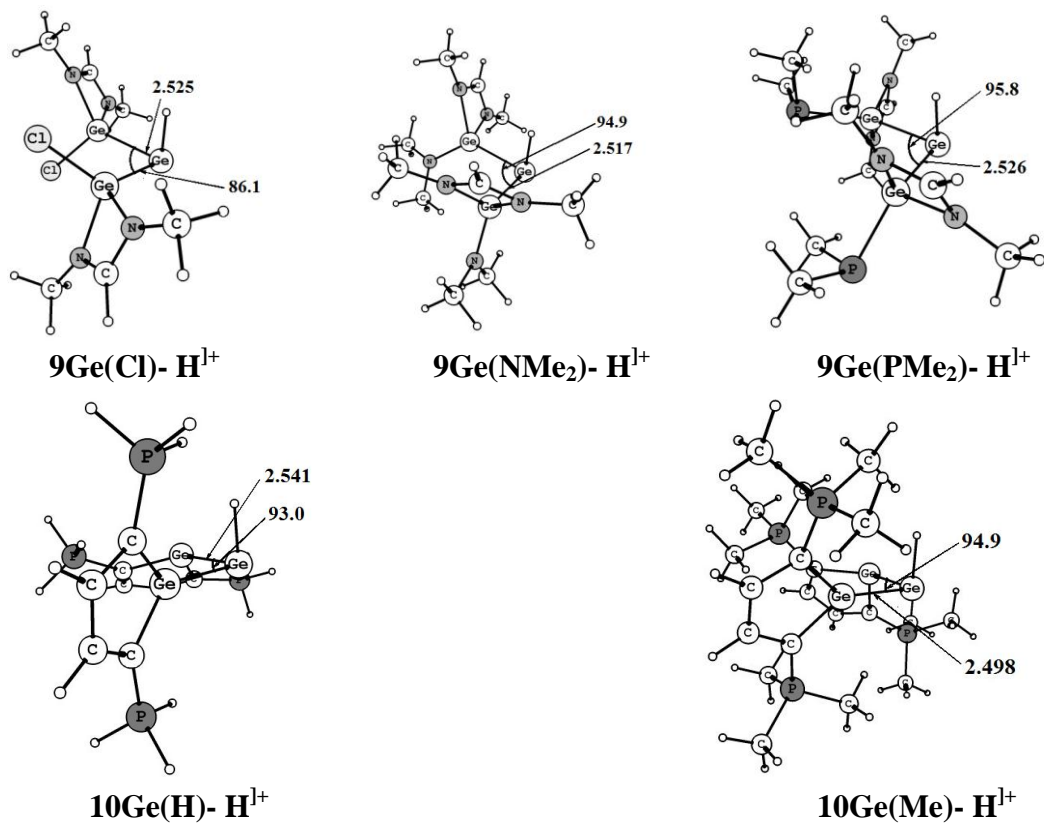

**Fig. S1.** (Continued).



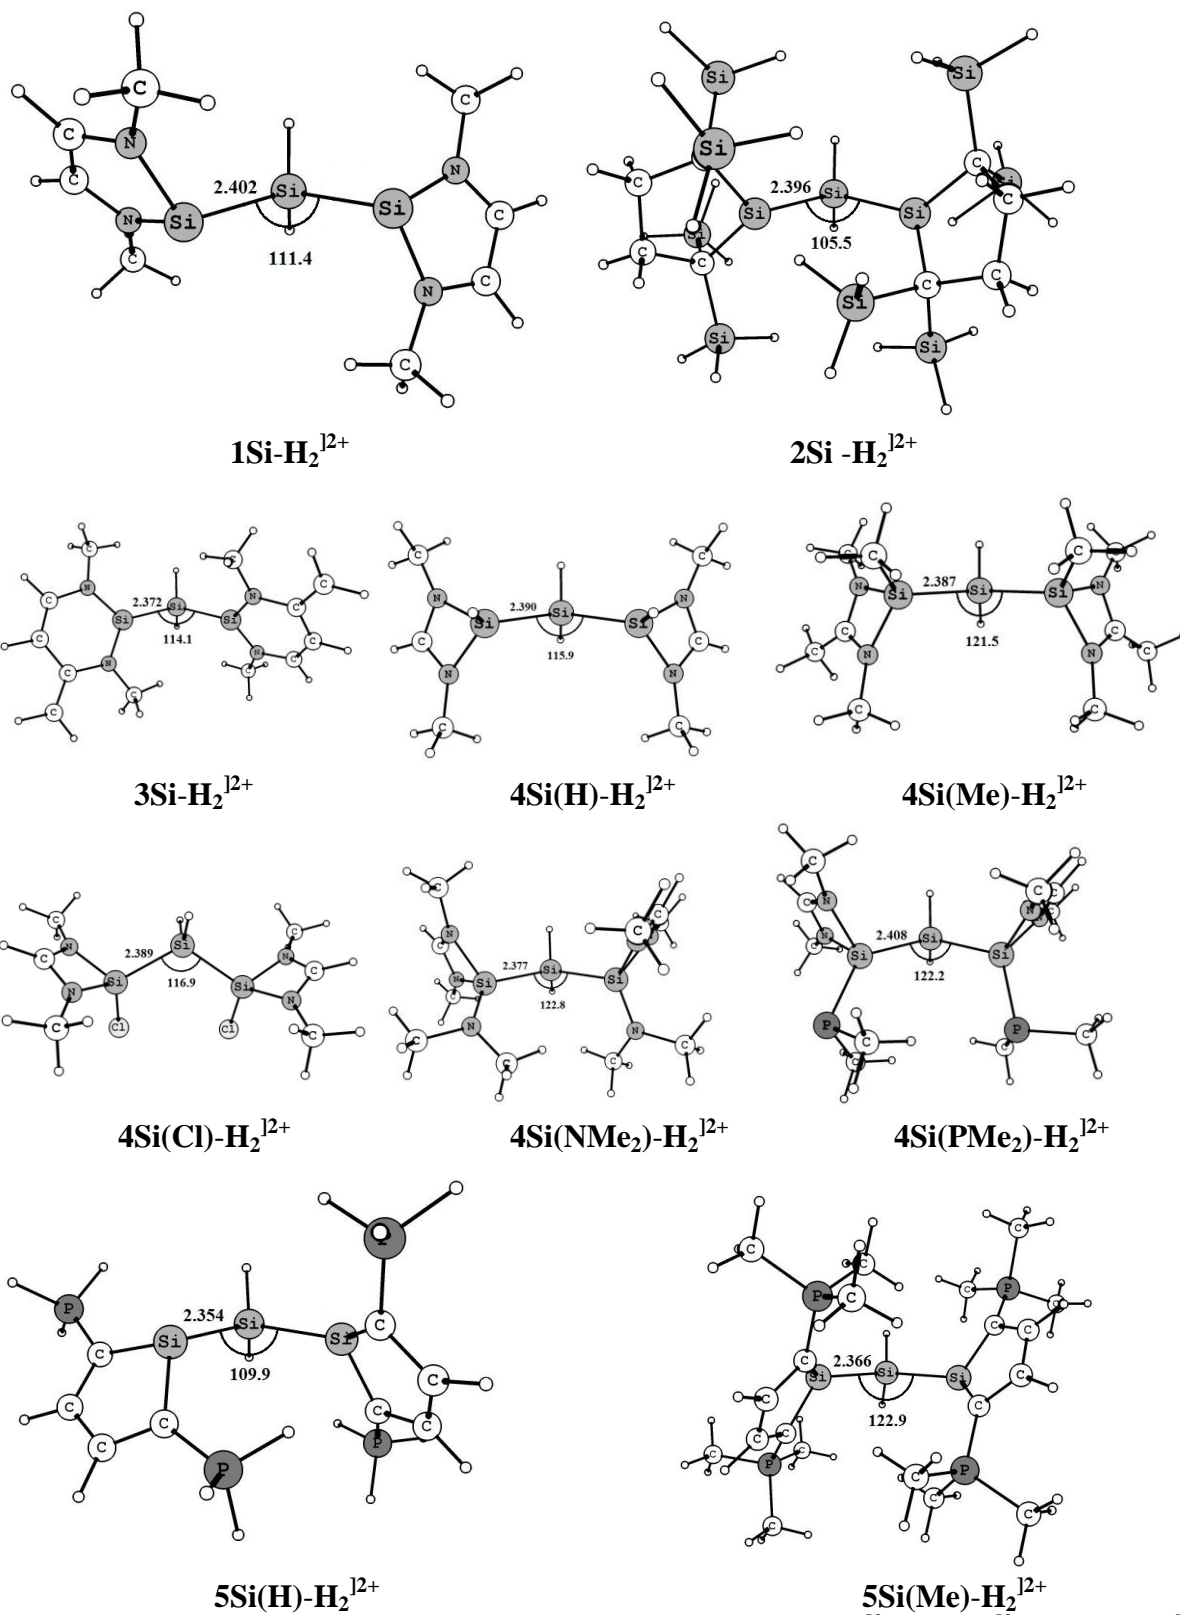

**Fig. S2.** Optimized geometries of doubly protonated species  $1\text{Si-H}_2^{12+}$ - $5\text{Si-H}_2^{12+}$  and  $6\text{Ge-H}^{1+}$ - $10\text{Ge-H}^{1+}$ . Bond lengths are in Å and angles in degrees.

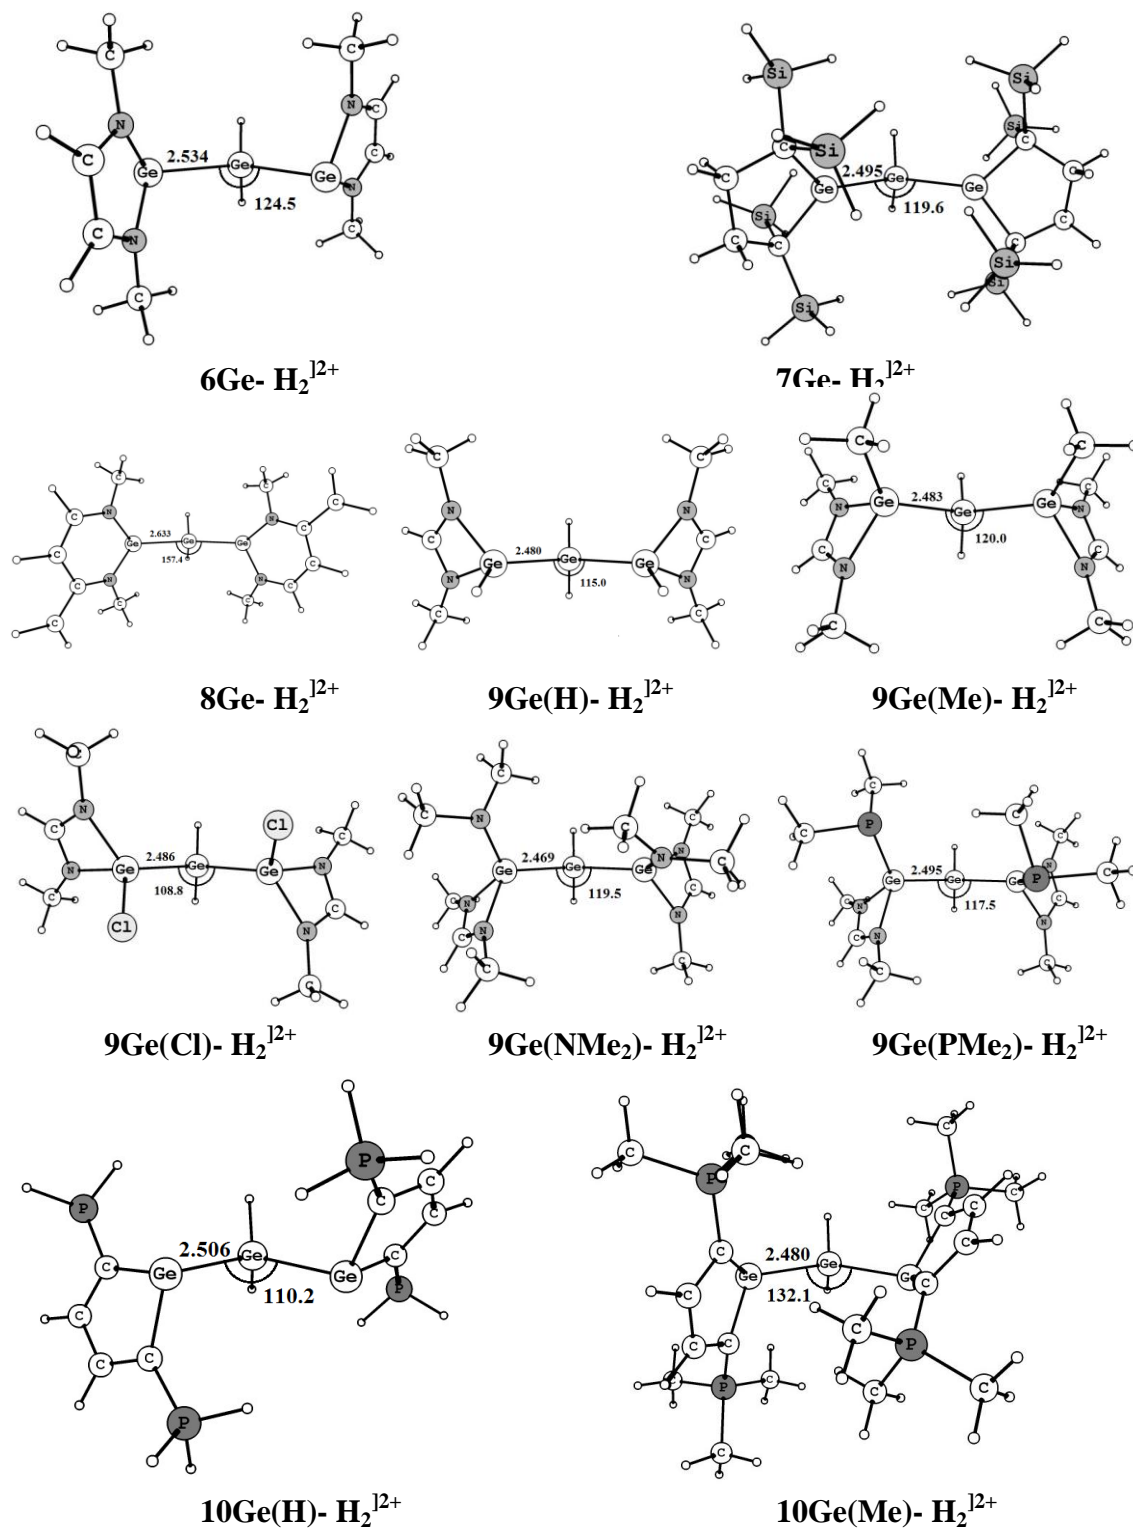

Fig. S2. (Continued).

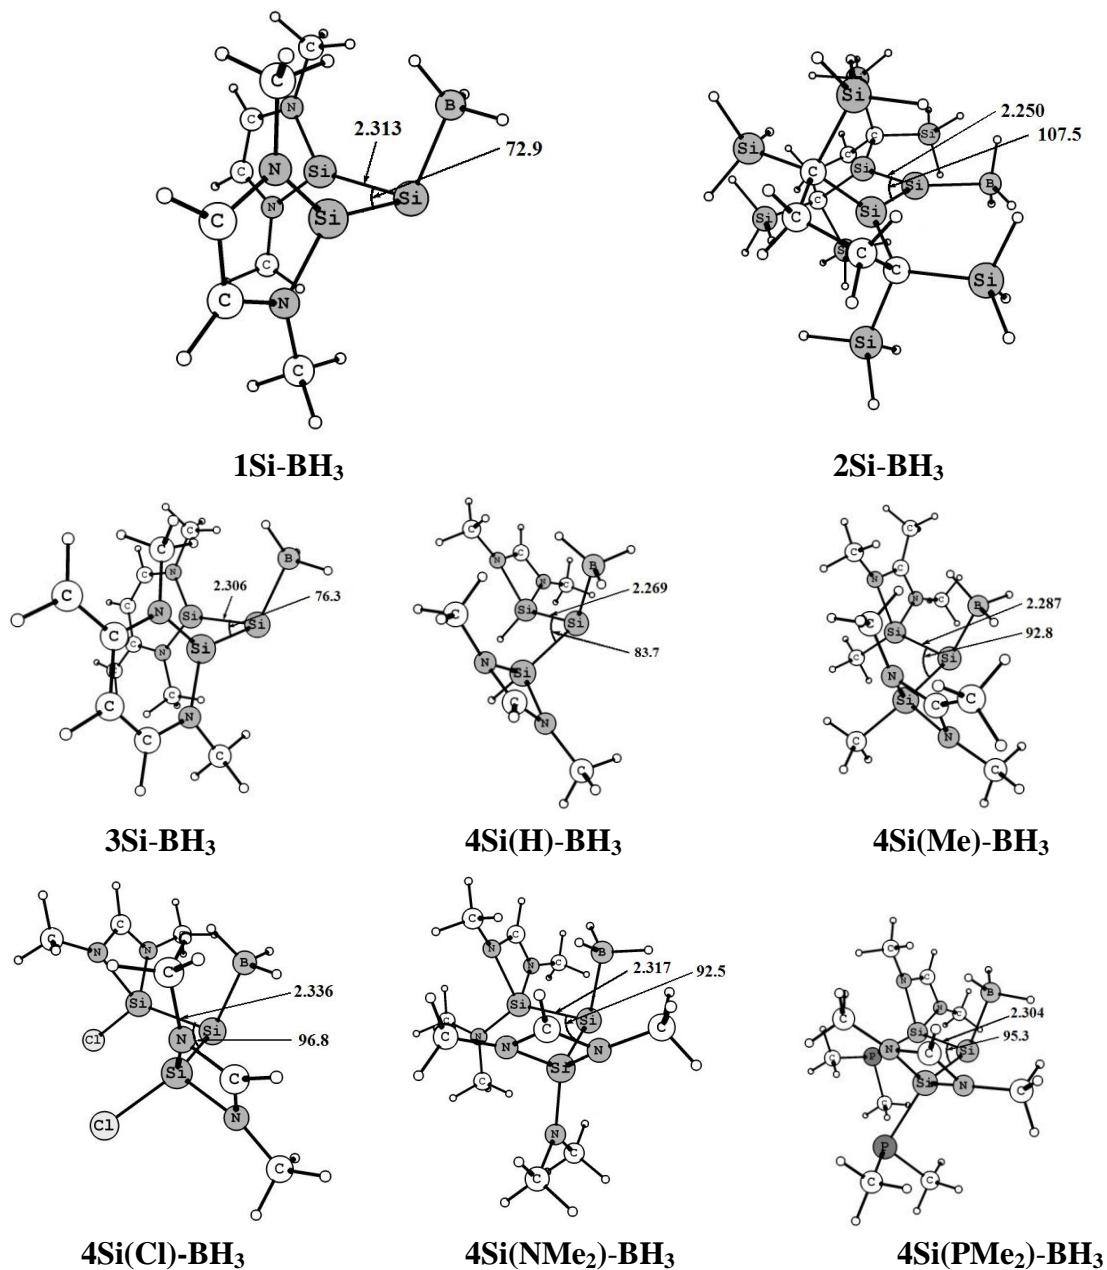

**Fig. S3.** Optimized geometries of 1Si-BH<sub>3</sub>-5Si-BH<sub>3</sub>, 6Ge-BH<sub>3</sub>-6Ge-BH<sub>3</sub>, 1Si-(BH<sub>3</sub>)<sub>2</sub>-5Si-(BH<sub>3</sub>)<sub>2</sub> and 6Ge-(BH<sub>3</sub>)<sub>2</sub>-10Ge-(BH<sub>3</sub>)<sub>2</sub>. Bond lengths are in Å and angles are in degrees.

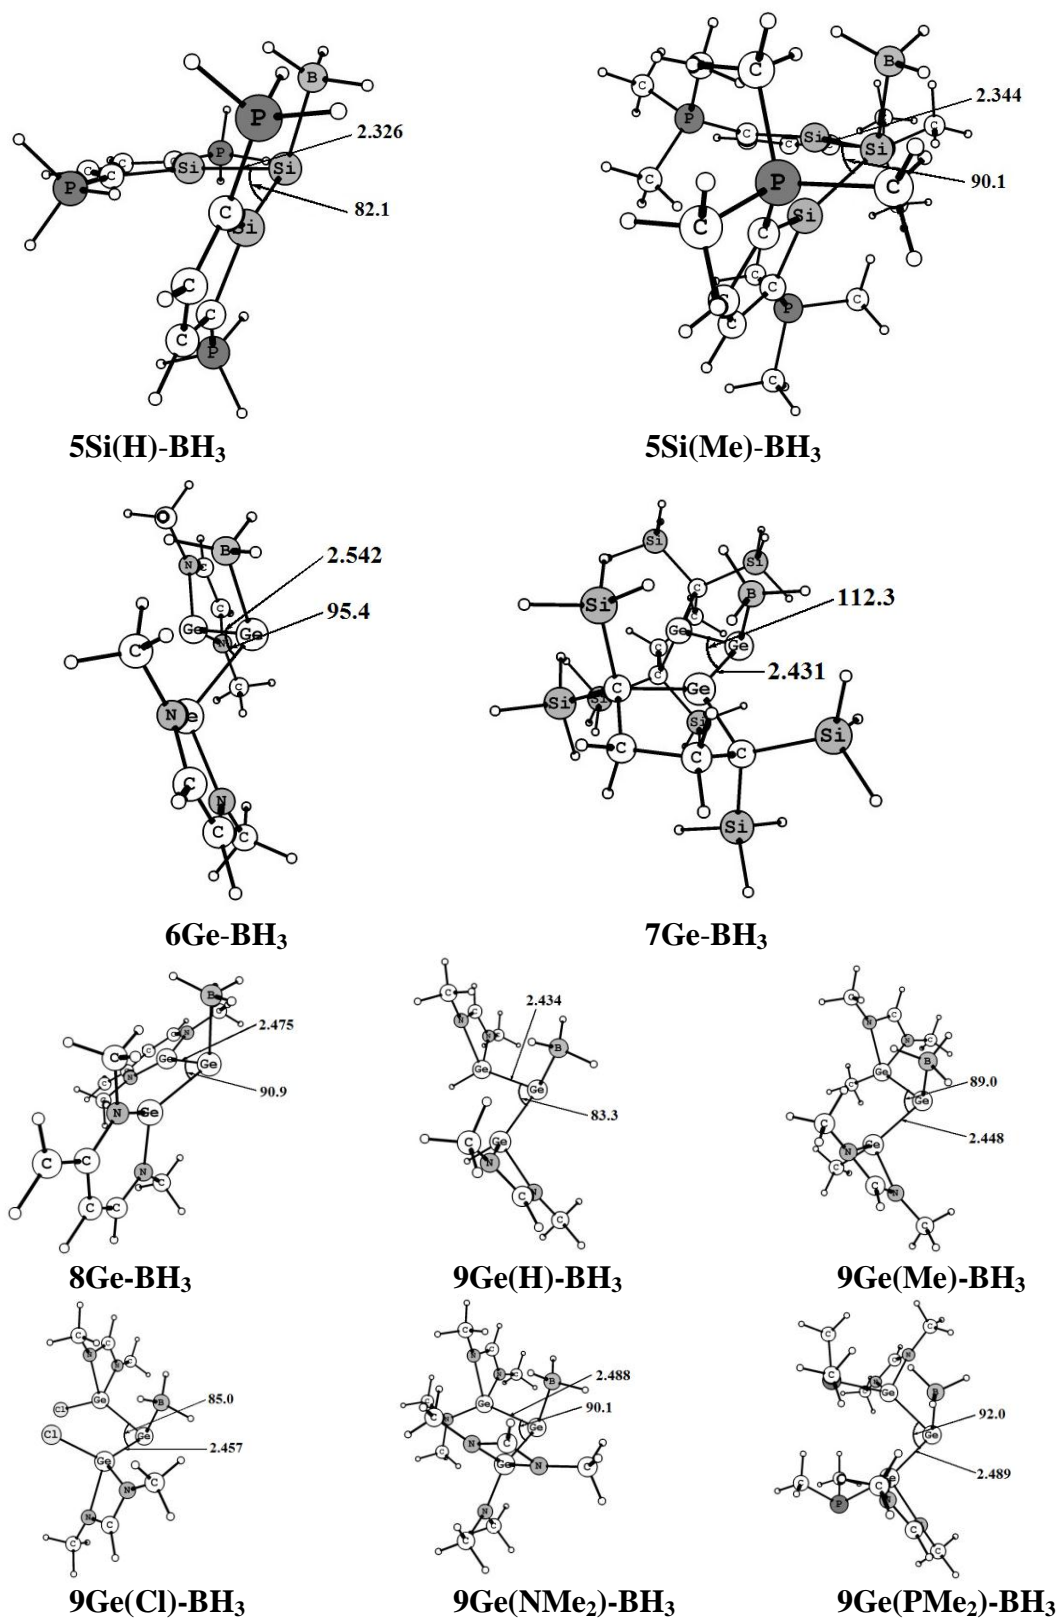

Fig. S3. (Continued).

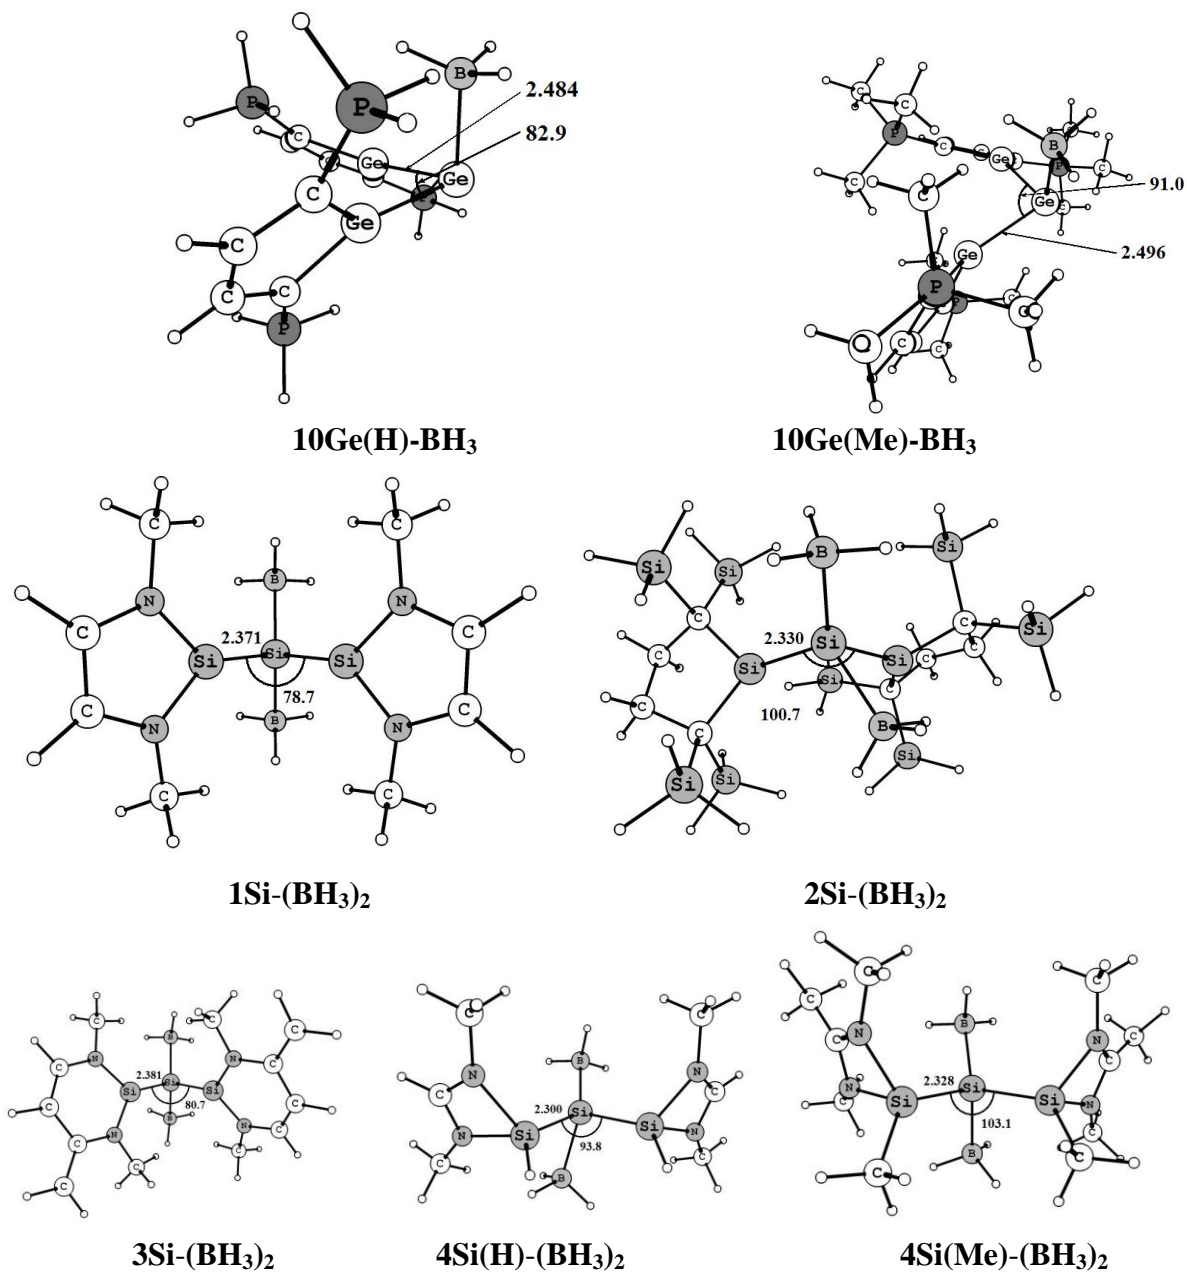

Fig. S3. (Continued).

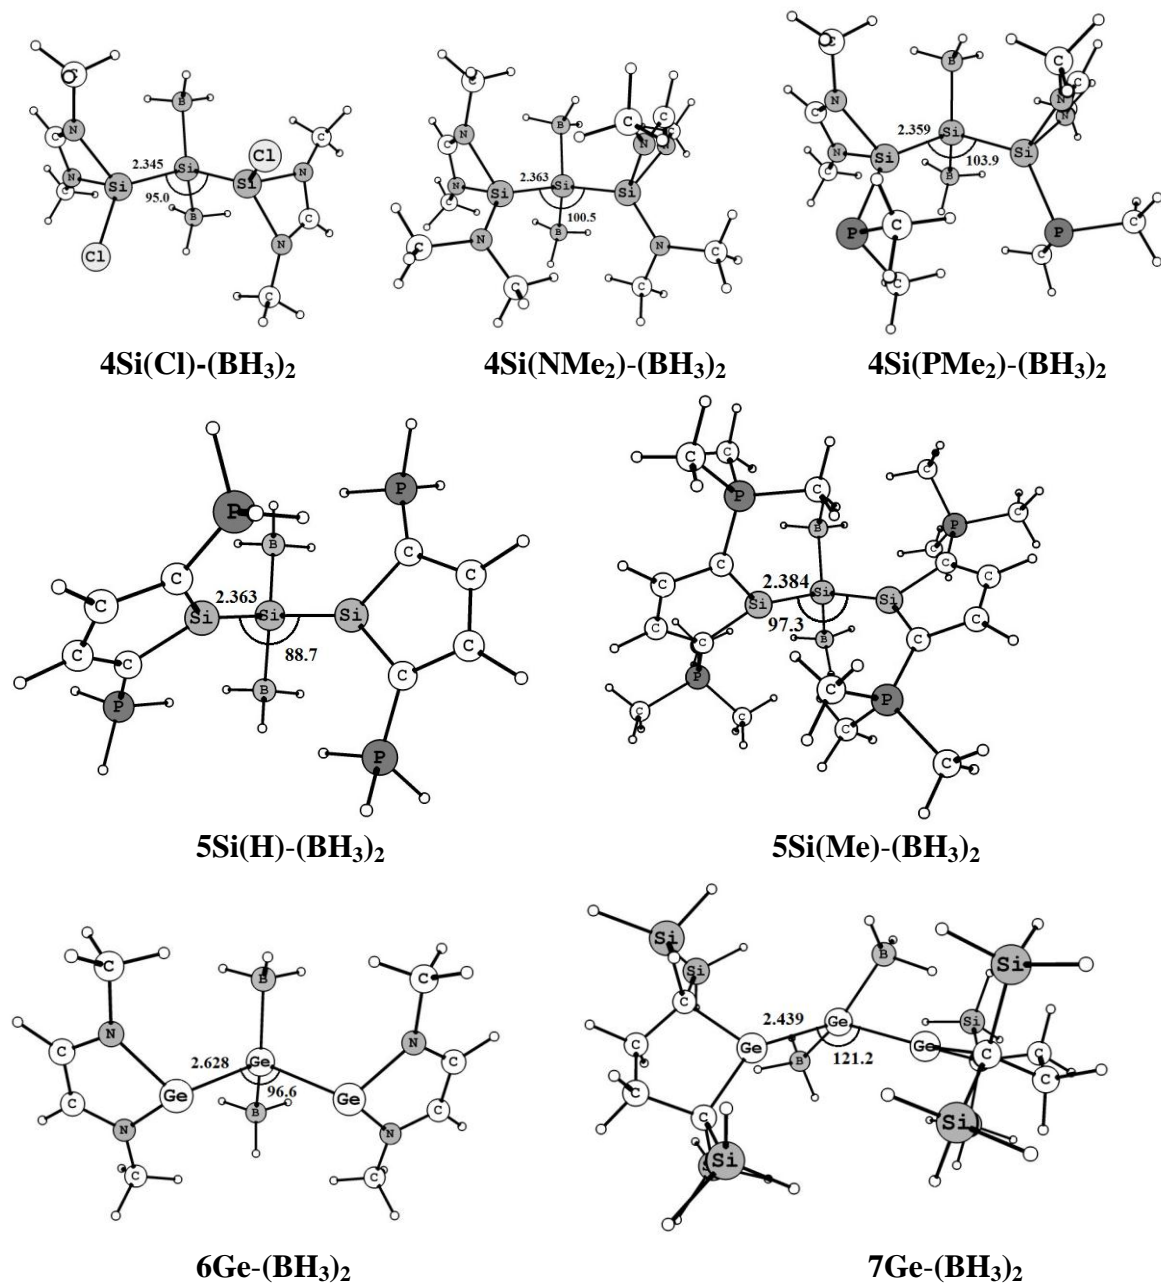

**Fig. S3.** (Continued).

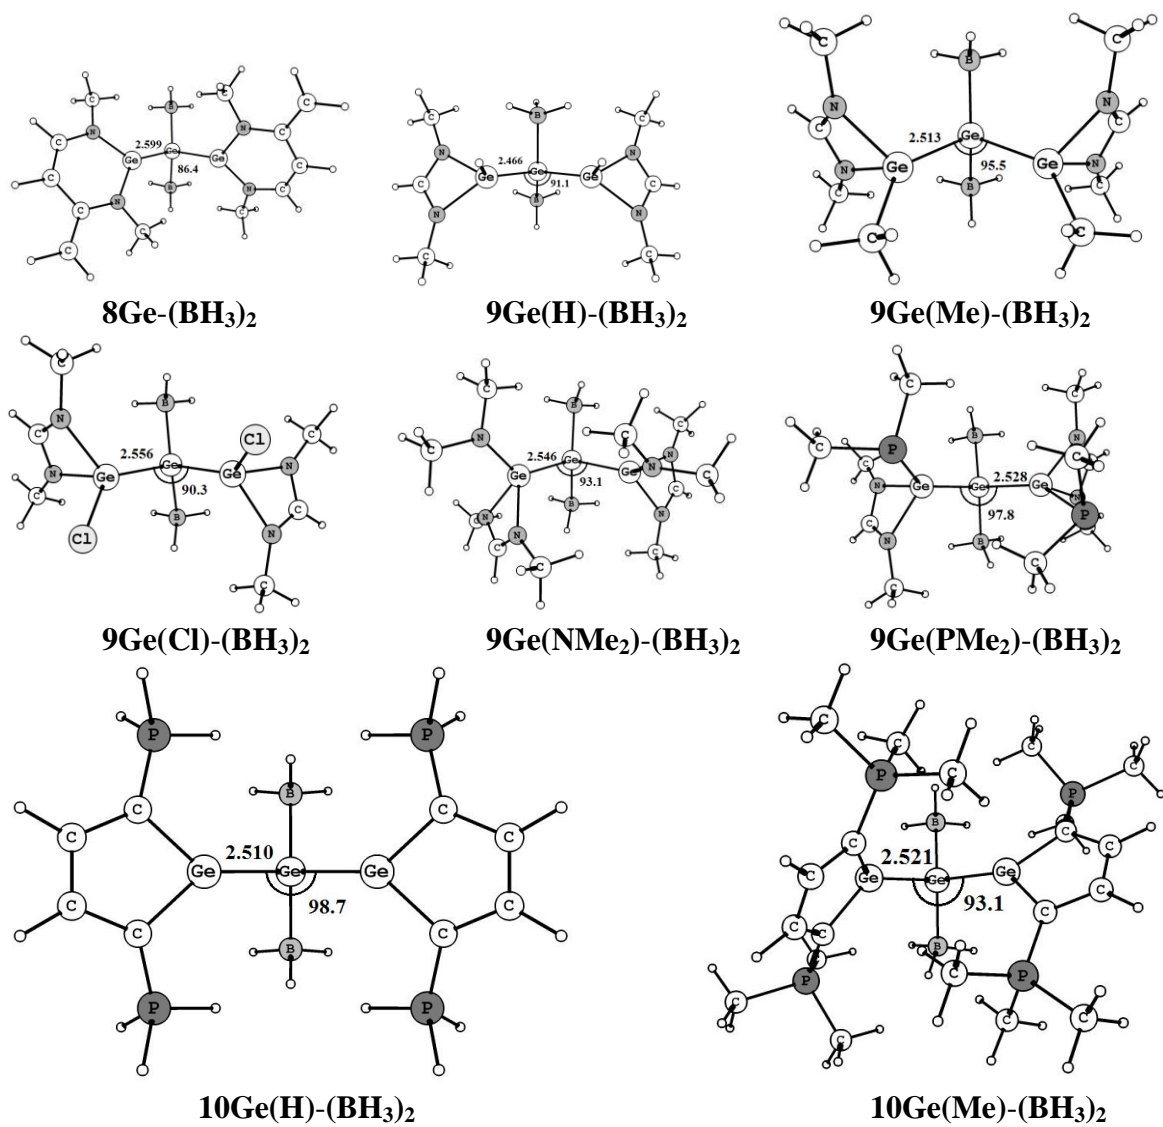

**Fig. S3.** (Continued).

Cartesian coordinates of the optimized geometries of all the molecules along with their total energies including zero point vibrational correction.

**1Si, T. E. = -1402.01489**

|    |              |              |              |
|----|--------------|--------------|--------------|
| 14 | -0.000005000 | -0.000020000 | 2.397166000  |
| 14 | 1.304496000  | -0.253630000 | 0.573689000  |
| 14 | -1.304496000 | 0.253614000  | 0.573684000  |
| 7  | 1.695428000  | -1.510915000 | -0.632145000 |
| 7  | 2.755103000  | 0.628505000  | 0.021600000  |
| 7  | -2.755121000 | -0.628490000 | 0.021595000  |
| 7  | -1.695405000 | 1.510910000  | -0.632146000 |
| 6  | 2.823249000  | -1.198930000 | -1.378610000 |
| 1  | 3.159792000  | -1.857280000 | -2.178044000 |
| 6  | 3.415096000  | -0.023050000 | -1.010830000 |
| 1  | 4.310376000  | 0.405377000  | -1.459025000 |
| 6  | -2.823236000 | 1.198952000  | -1.378607000 |
| 1  | -3.159769000 | 1.857312000  | -2.178037000 |
| 6  | -3.415103000 | 0.023082000  | -1.010831000 |
| 1  | -4.310391000 | -0.405329000 | -1.459029000 |
| 6  | 0.962194000  | -2.747384000 | -0.873415000 |
| 6  | 3.253410000  | 1.889508000  | 0.556673000  |
| 6  | -0.962167000 | 2.747381000  | -0.873390000 |
| 6  | -3.253438000 | -1.889500000 | 0.556647000  |
| 1  | 3.329462000  | 2.656186000  | -0.232688000 |
| 1  | -3.329472000 | -2.656172000 | -0.232722000 |
| 1  | -0.173680000 | 2.845130000  | -0.114345000 |
| 1  | 0.490145000  | -2.751036000 | -1.870221000 |
| 1  | 2.553681000  | 2.246404000  | 1.326174000  |
| 1  | 4.245262000  | 1.764017000  | 1.022045000  |
| 1  | -2.553725000 | -2.246401000 | 1.326159000  |
| 1  | -4.245300000 | -1.764012000 | 1.021998000  |
| 1  | 1.630647000  | -3.620610000 | -0.794792000 |
| 1  | 0.173788000  | -2.845215000 | -0.114296000 |
| 1  | -0.490221000 | 2.751099000  | -1.870244000 |
| 1  | -1.630587000 | 3.620620000  | -0.794628000 |

**2Si, T. E.= -3508.53065**

|    |              |              |              |
|----|--------------|--------------|--------------|
| 6  | -3.833081000 | -0.849298000 | 1.315335000  |
| 6  | -2.362681000 | -1.296221000 | 1.041017000  |
| 14 | -1.730056000 | -0.004411000 | -0.238438000 |
| 6  | -3.476314000 | 0.644484000  | -0.712293000 |
| 6  | -4.472625000 | -0.313768000 | 0.013527000  |
| 1  | -3.839325000 | -0.051577000 | 2.078542000  |



|    |              |              |              |
|----|--------------|--------------|--------------|
| 14 | -0.000068000 | 0.000124000  | -1.666120000 |
| 1  | -5.433740000 | 0.180301000  | 0.236167000  |
| 14 | 1.730012000  | 0.004494000  | -0.238522000 |
| 6  | 3.476172000  | -0.644735000 | -0.712257000 |
| 6  | 4.472618000  | 0.313536000  | 0.013350000  |
| 6  | 3.833169000  | 0.849349000  | 1.315079000  |
| 6  | 2.362835000  | 1.296442000  | 1.040695000  |
| 1  | 4.711569000  | 1.166772000  | -0.646696000 |
| 1  | 4.438093000  | 1.677169000  | 1.723128000  |
| 14 | -3.596507000 | 2.436181000  | -0.037858000 |
| 1  | -3.193604000 | 2.513361000  | 1.408792000  |
| 1  | -2.712540000 | 3.356586000  | -0.822816000 |
| 1  | -5.022481000 | 2.904114000  | -0.140446000 |
| 14 | -3.744141000 | 0.695665000  | -2.601342000 |
| 1  | -2.660354000 | 1.481129000  | -3.275671000 |
| 1  | -3.762403000 | -0.706679000 | -3.137267000 |
| 1  | -5.065878000 | 1.339063000  | -2.924409000 |
| 14 | -1.335478000 | -1.504306000 | 2.627737000  |
| 1  | 0.131724000  | -1.530912000 | 2.313080000  |
| 1  | -1.630865000 | -0.381471000 | 3.578915000  |
| 1  | -1.685680000 | -2.798552000 | 3.309799000  |
| 14 | -2.304418000 | -2.993134000 | 0.129089000  |
| 1  | -2.788864000 | -2.904417000 | -1.288002000 |
| 1  | -0.904915000 | -3.526350000 | 0.128590000  |
| 1  | -3.204386000 | -3.944060000 | 0.873600000  |
| 14 | 1.335708000  | 1.505014000  | 2.627408000  |
| 1  | 1.631114000  | 0.382434000  | 3.578887000  |
| 1  | 1.686027000  | 2.799436000  | 3.309077000  |
| 1  | -0.131507000 | 1.531581000  | 2.312847000  |
| 14 | 2.304800000  | 2.993196000  | 0.128463000  |
| 1  | 3.205036000  | 3.944091000  | 0.872690000  |
| 1  | 2.789067000  | 2.904130000  | -1.288669000 |
| 1  | 0.905398000  | 3.526677000  | 0.128031000  |
| 14 | 3.596099000  | -2.436308000 | -0.037429000 |
| 1  | 5.021998000  | -2.904483000 | -0.139933000 |
| 1  | 3.193195000  | -2.513114000 | 1.409241000  |
| 1  | 2.711974000  | -3.356739000 | -0.822175000 |
| 14 | 3.743981000  | -0.696376000 | -2.601299000 |
| 1  | 3.762290000  | 0.705833000  | -3.137577000 |
| 1  | 5.065698000  | -1.339896000 | -2.924204000 |
| 1  | 2.660165000  | -1.481959000 | -3.275441000 |
| 1  | 5.433695000  | -0.180591000 | 0.236022000  |
| 1  | 3.839291000  | 0.051732000  | 2.078395000  |
| 1  | -4.711534000 | -1.167141000 | -0.646357000 |
| 1  | -4.437874000 | -1.677158000 | 1.723494000  |

**3Si, T. E.= -1556.79235**

|    |              |              |              |
|----|--------------|--------------|--------------|
| 6  | 3.134247000  | -1.592965000 | -0.645996000 |
| 7  | 1.923065000  | -0.863114000 | -0.812591000 |
| 14 | 1.586438000  | 0.741847000  | -0.157500000 |
| 7  | 3.179602000  | 1.249252000  | 0.403452000  |
| 6  | 4.280919000  | 0.401646000  | 0.359193000  |
| 6  | 4.274010000  | -0.876056000 | -0.092015000 |
| 14 | -0.070458000 | 2.254743000  | -0.238283000 |
| 1  | 5.208561000  | 0.831803000  | 0.748416000  |
| 1  | 5.208908000  | -1.433690000 | -0.037491000 |
| 14 | -1.459850000 | 0.531414000  | 0.143981000  |
| 7  | -3.128835000 | 0.587455000  | -0.415484000 |
| 6  | -4.169065000 | -0.318483000 | -0.086323000 |
| 6  | -3.810622000 | -1.448908000 | 0.758477000  |
| 6  | -2.602969000 | -1.683691000 | 1.323364000  |
| 7  | -1.466837000 | -0.880347000 | 1.204166000  |
| 1  | -4.605146000 | -2.166761000 | 0.962582000  |
| 1  | -2.467474000 | -2.568543000 | 1.951975000  |
| 6  | 3.257353000  | -2.899202000 | -1.017896000 |
| 1  | 4.220109000  | -3.393630000 | -0.895839000 |
| 1  | 2.446595000  | -3.490800000 | -1.434121000 |
| 6  | 0.872384000  | -1.547085000 | -1.571394000 |
| 1  | 1.286164000  | -1.920936000 | -2.522398000 |
| 1  | 0.451804000  | -2.402403000 | -1.015210000 |
| 1  | 0.062467000  | -0.838828000 | -1.795596000 |
| 6  | 3.387741000  | 2.581521000  | 0.980913000  |
| 1  | 4.033107000  | 3.198885000  | 0.334324000  |
| 1  | 2.416915000  | 3.086528000  | 1.086474000  |
| 1  | 3.846920000  | 2.507250000  | 1.980337000  |
| 6  | -3.485668000 | 1.671792000  | -1.334374000 |
| 1  | -4.227110000 | 2.348224000  | -0.877095000 |
| 1  | -2.585429000 | 2.250626000  | -1.584517000 |
| 1  | -3.911287000 | 1.261026000  | -2.265376000 |
| 6  | -0.311283000 | -1.276037000 | 2.017190000  |
| 1  | -0.637477000 | -1.527345000 | 3.038804000  |
| 1  | 0.219808000  | -2.141509000 | 1.587083000  |
| 1  | 0.394410000  | -0.435268000 | 2.083173000  |
| 6  | -5.447628000 | -0.171151000 | -0.535211000 |
| 1  | -6.194561000 | -0.911789000 | -0.252948000 |
| 1  | -5.778581000 | 0.654086000  | -1.159732000 |

**4Si(H), T. E.= -1325.75678**

|   |              |              |              |
|---|--------------|--------------|--------------|
| 6 | -3.821501000 | -0.023147000 | -0.076397000 |
| 7 | -3.050208000 | -1.101325000 | -0.156814000 |

|    |              |              |              |
|----|--------------|--------------|--------------|
| 14 | -1.444904000 | -0.008983000 | -0.308985000 |
| 7  | -3.070704000 | 1.064310000  | -0.198173000 |
| 14 | 1.444920000  | 0.008786000  | -0.308974000 |
| 7  | 3.070796000  | -1.064354000 | -0.197629000 |
| 6  | 3.821521000  | 0.023216000  | -0.076428000 |
| 7  | 3.050150000  | 1.101314000  | -0.157308000 |
| 6  | -3.422230000 | -2.463720000 | 0.152301000  |
| 1  | -2.889762000 | -2.815285000 | 1.051604000  |
| 1  | -4.506481000 | -2.543283000 | 0.334326000  |
| 1  | -3.159573000 | -3.134961000 | -0.680323000 |
| 6  | -3.521255000 | 2.434546000  | -0.281636000 |
| 1  | -2.902682000 | 3.070357000  | 0.369995000  |
| 1  | -3.441614000 | 2.824517000  | -1.310931000 |
| 1  | -4.571508000 | 2.524601000  | 0.041519000  |
| 6  | 3.421880000  | 2.463690000  | 0.152316000  |
| 1  | 4.506246000  | 2.543567000  | 0.333518000  |
| 1  | 3.158310000  | 3.135236000  | -0.679759000 |
| 1  | 2.889981000  | 2.814601000  | 1.052218000  |
| 6  | 3.521547000  | -2.434499000 | -0.281603000 |
| 1  | 4.571656000  | -2.524608000 | 0.042011000  |
| 1  | 2.902729000  | -3.070676000 | 0.369426000  |
| 1  | 3.442433000  | -2.823980000 | -1.311129000 |
| 1  | 4.911467000  | 0.030459000  | 0.080162000  |
| 1  | -4.911441000 | -0.030240000 | 0.080237000  |
| 14 | -0.000002000 | 0.000235000  | 1.423544000  |
| 1  | 1.243507000  | 0.024067000  | -1.806455000 |
| 1  | -1.243466000 | -0.025052000 | -1.806453000 |

**4Si(Me), T. E= -1482.9797**

|    |              |              |              |
|----|--------------|--------------|--------------|
| 6  | -3.883522000 | 0.015735000  | -0.370718000 |
| 7  | -3.140332000 | 1.087186000  | -0.074650000 |
| 14 | -1.597040000 | -0.003335000 | 0.375530000  |
| 7  | -3.149764000 | -1.065043000 | -0.081418000 |
| 14 | 1.597068000  | 0.003188000  | 0.375485000  |
| 7  | 3.149396000  | 1.065227000  | -0.082928000 |
| 6  | 3.883534000  | -0.015606000 | -0.370826000 |
| 7  | 3.140700000  | -1.086989000 | -0.073308000 |
| 6  | -3.410795000 | 2.481399000  | -0.333244000 |
| 1  | -2.474023000 | 2.961411000  | -0.657428000 |
| 1  | -4.154167000 | 2.622087000  | -1.134570000 |
| 1  | -3.770885000 | 3.007320000  | 0.568882000  |
| 6  | -3.478756000 | -2.452266000 | -0.306565000 |
| 1  | -2.562555000 | -2.983127000 | -0.608614000 |
| 1  | -3.872993000 | -2.940787000 | 0.603000000  |
| 1  | -4.222131000 | -2.576399000 | -1.111239000 |

|    |              |              |              |
|----|--------------|--------------|--------------|
| 6  | 3.411077000  | -2.481357000 | -0.331254000 |
| 1  | 4.154019000  | -2.622485000 | -1.132906000 |
| 1  | 3.771703000  | -3.006727000 | 0.570970000  |
| 1  | 2.474140000  | -2.961591000 | -0.654646000 |
| 6  | 3.478327000  | 2.452379000  | -0.308427000 |
| 1  | 4.221460000  | 2.576372000  | -1.113361000 |
| 1  | 2.562030000  | 2.983152000  | -0.610312000 |
| 1  | 3.872862000  | 2.941111000  | 0.600903000  |
| 6  | 5.267485000  | -0.005044000 | -0.948342000 |
| 1  | 5.294768000  | 0.591637000  | -1.872984000 |
| 1  | 5.975096000  | 0.450666000  | -0.238874000 |
| 1  | 5.615273000  | -1.019416000 | -1.178765000 |
| 6  | -5.267426000 | 0.004435000  | -0.948380000 |
| 1  | -5.974091000 | -0.455567000 | -0.240780000 |
| 1  | -5.617384000 | 1.018903000  | -1.175057000 |
| 1  | -5.293238000 | -0.588765000 | -1.875329000 |
| 14 | -0.000006000 | -0.002004000 | -1.224864000 |
| 6  | 1.699700000  | 0.002000000  | 2.292623000  |
| 1  | 1.206163000  | -0.884981000 | 2.715382000  |
| 1  | 2.755538000  | -0.003541000 | 2.604092000  |
| 1  | 1.213979000  | 0.891843000  | 2.718411000  |
| 6  | -1.699667000 | 0.001276000  | 2.292672000  |
| 1  | -1.213373000 | -0.887442000 | 2.720128000  |
| 1  | -1.206714000 | 0.889375000  | 2.713780000  |
| 1  | -2.755514000 | 0.006708000  | 2.604110000  |

**4Si(Cl), T. E.= -2245.18776**

|    |              |              |              |
|----|--------------|--------------|--------------|
| 6  | -3.598943000 | -0.754340000 | 0.146945000  |
| 7  | -2.533925000 | -1.179367000 | -0.516465000 |
| 14 | -1.462892000 | 0.218981000  | 0.284584000  |
| 7  | -3.276372000 | 0.348258000  | 0.827324000  |
| 14 | 1.462734000  | -0.220320000 | 0.282659000  |
| 7  | 3.276150000  | -0.355263000 | 0.824537000  |
| 6  | 3.599843000  | 0.751637000  | 0.151754000  |
| 7  | 2.535340000  | 1.182098000  | -0.508909000 |
| 6  | -2.384728000 | -2.418563000 | -1.249380000 |
| 1  | -1.608438000 | -3.045624000 | -0.785285000 |
| 1  | -3.333819000 | -2.978020000 | -1.261047000 |
| 1  | -2.080410000 | -2.213237000 | -2.286719000 |
| 6  | -4.144493000 | 1.190142000  | 1.619914000  |
| 1  | -3.665692000 | 1.419298000  | 2.583553000  |
| 1  | -4.356143000 | 2.142181000  | 1.105558000  |
| 1  | -5.100436000 | 0.680374000  | 1.819755000  |
| 6  | 2.388783000  | 2.423773000  | -1.238058000 |
| 1  | 3.337553000  | 2.983863000  | -1.243300000 |

|    |              |              |              |
|----|--------------|--------------|--------------|
| 1  | 2.089294000  | 2.222315000  | -2.277611000 |
| 1  | 1.610057000  | 3.048591000  | -0.775081000 |
| 6  | 4.141830000  | -1.199544000 | 1.617207000  |
| 1  | 5.100449000  | -0.693730000 | 1.814201000  |
| 1  | 3.664035000  | -1.425159000 | 2.582250000  |
| 1  | 4.348217000  | -2.153245000 | 1.103897000  |
| 1  | 4.583176000  | 1.242971000  | 0.175501000  |
| 1  | -4.581774000 | -1.246826000 | 0.167282000  |
| 14 | 0.000267000  | -0.005751000 | 1.971263000  |
| 17 | 1.408346000  | -1.527559000 | -1.444984000 |
| 17 | -1.410093000 | 1.538547000  | -1.433706000 |

**4Si(NMe<sub>2</sub>), T. E.= -1593.67532**

|    |              |              |              |
|----|--------------|--------------|--------------|
| 6  | -3.741636000 | -0.913164000 | 0.651566000  |
| 7  | -3.277614000 | -1.182153000 | -0.559773000 |
| 14 | -1.625605000 | -0.198825000 | -0.199446000 |
| 7  | -2.955049000 | -0.017867000 | 1.244340000  |
| 14 | 1.625795000  | -0.200183000 | 0.200008000  |
| 7  | 2.952683000  | -0.013889000 | -1.245294000 |
| 6  | 3.740541000  | -0.911132000 | -0.657044000 |
| 7  | 3.278215000  | -1.185223000 | 0.553737000  |
| 6  | -3.804115000 | -2.142059000 | -1.503448000 |
| 1  | -3.004598000 | -2.836999000 | -1.806106000 |
| 1  | -4.626594000 | -2.726211000 | -1.058628000 |
| 1  | -4.182581000 | -1.642962000 | -2.410965000 |
| 6  | -2.969624000 | 0.292572000  | 2.659782000  |
| 1  | -2.108146000 | -0.173543000 | 3.167897000  |
| 1  | -2.914017000 | 1.380962000  | 2.816377000  |
| 1  | -3.892672000 | -0.078666000 | 3.134650000  |
| 6  | 3.807363000  | -2.147255000 | 1.493736000  |
| 1  | 4.628038000  | -2.730970000 | 1.045024000  |
| 1  | 4.189093000  | -1.650255000 | 2.401060000  |
| 1  | 3.008437000  | -2.842321000 | 1.797566000  |
| 6  | 2.965352000  | 0.301711000  | -2.659623000 |
| 1  | 3.887582000  | -0.068215000 | -3.137101000 |
| 1  | 2.103032000  | -0.162237000 | -3.168278000 |
| 1  | 2.910053000  | 1.390686000  | -2.812251000 |
| 1  | 4.613181000  | -1.390686000 | -1.126762000 |
| 1  | -4.614746000 | -1.395056000 | 1.118008000  |
| 14 | -0.000406000 | -1.764829000 | 0.000282000  |
| 7  | -1.738182000 | 1.386756000  | -0.953858000 |
| 7  | 1.739381000  | 1.382732000  | 0.959834000  |
| 6  | -0.761851000 | 1.825362000  | -1.941906000 |
| 1  | -0.311054000 | 2.796244000  | -1.659948000 |
| 1  | 0.040135000  | 1.077673000  | -2.024163000 |

|   |              |             |              |
|---|--------------|-------------|--------------|
| 1 | -1.223657000 | 1.944738000 | -2.943388000 |
| 6 | -2.895774000 | 2.267751000 | -0.874184000 |
| 1 | -3.589535000 | 1.920139000 | -0.097728000 |
| 1 | -2.589099000 | 3.301650000 | -0.621761000 |
| 1 | -3.443960000 | 2.314359000 | -1.837565000 |
| 6 | 0.767133000  | 1.815627000 | 1.954451000  |
| 1 | -0.033080000 | 1.066136000 | 2.037832000  |
| 1 | 1.233875000  | 1.932046000 | 2.954002000  |
| 1 | 0.313289000  | 2.786858000 | 1.678742000  |
| 6 | 2.893071000  | 2.268324000 | 0.875312000  |
| 1 | 3.444315000  | 2.317710000 | 1.836797000  |
| 1 | 3.585529000  | 1.922858000 | 0.096766000  |
| 1 | 2.581396000  | 3.300859000 | 0.623357000  |

**4Si(PMe<sub>2</sub>), T. E.= -2166.94014**

|    |              |              |              |
|----|--------------|--------------|--------------|
| 6  | 3.991802000  | -1.183278000 | -0.404619000 |
| 7  | 3.164433000  | -1.430236000 | 0.602063000  |
| 14 | 1.783233000  | -0.291956000 | -0.179586000 |
| 7  | 3.419283000  | -0.328945000 | -1.245092000 |
| 14 | -1.541934000 | -0.430446000 | -0.233221000 |
| 7  | -2.591738000 | -1.126544000 | 1.291093000  |
| 6  | -3.468663000 | -1.660286000 | 0.454311000  |
| 7  | -3.161837000 | -1.307080000 | -0.793647000 |
| 6  | 3.293751000  | -2.465918000 | 1.601387000  |
| 1  | 2.433040000  | -3.152790000 | 1.541034000  |
| 1  | 4.217255000  | -3.047459000 | 1.447741000  |
| 1  | 3.320709000  | -2.035574000 | 2.615455000  |
| 6  | 4.015839000  | 0.267634000  | -2.418608000 |
| 1  | 3.292102000  | 0.255661000  | -3.247809000 |
| 1  | 4.315168000  | 1.314039000  | -2.237013000 |
| 1  | 4.910216000  | -0.295744000 | -2.731500000 |
| 6  | -3.755124000 | -1.818921000 | -2.010183000 |
| 1  | -4.519094000 | -2.579441000 | -1.780320000 |
| 1  | -4.231500000 | -1.013667000 | -2.592419000 |
| 1  | -2.979005000 | -2.281976000 | -2.640546000 |
| 6  | -2.523241000 | -1.322938000 | 2.720730000  |
| 1  | -3.299155000 | -2.028200000 | 3.061482000  |
| 1  | -1.537982000 | -1.731587000 | 2.997198000  |
| 1  | -2.658772000 | -0.371058000 | 3.260299000  |
| 1  | -4.302423000 | -2.321867000 | 0.735478000  |
| 1  | 4.991030000  | -1.627391000 | -0.532284000 |
| 14 | 0.175091000  | -1.602255000 | -1.117749000 |
| 15 | 2.383345000  | 1.609686000  | 1.026056000  |
| 15 | -2.031841000 | 1.821852000  | -0.017324000 |
| 6  | 1.148138000  | 1.654785000  | 2.448006000  |

|   |              |             |              |
|---|--------------|-------------|--------------|
| 1 | 0.107628000  | 1.729972000 | 2.100264000  |
| 1 | 1.265754000  | 0.754903000 | 3.068175000  |
| 1 | 1.377057000  | 2.530201000 | 3.075496000  |
| 6 | 1.684392000  | 3.001996000 | -0.033390000 |
| 1 | 2.174691000  | 3.000830000 | -1.017541000 |
| 1 | 0.595377000  | 2.928835000 | -0.166258000 |
| 1 | 1.917311000  | 3.959289000 | 0.458478000  |
| 6 | -2.066884000 | 2.293961000 | -1.841192000 |
| 1 | -2.779471000 | 1.697639000 | -2.430289000 |
| 1 | -2.335032000 | 3.358418000 | -1.925660000 |
| 1 | -1.061766000 | 2.155368000 | -2.261745000 |
| 6 | -3.881158000 | 1.839256000 | 0.350836000  |
| 1 | -4.457826000 | 1.166513000 | -0.301786000 |
| 1 | -4.048728000 | 1.552264000 | 1.397764000  |
| 1 | -4.252696000 | 2.866831000 | 0.218531000  |

**5Si(H), T. E.= -2548.23680**

|    |              |              |              |
|----|--------------|--------------|--------------|
| 6  | 3.821018000  | -0.809820000 | -0.498450000 |
| 6  | 2.898962000  | -1.651888000 | -1.083226000 |
| 6  | 1.549033000  | -1.127875000 | -1.159177000 |
| 14 | 1.450676000  | 0.564309000  | -0.377821000 |
| 6  | 3.277444000  | 0.443316000  | -0.016054000 |
| 1  | 4.875394000  | -1.084678000 | -0.413463000 |
| 1  | 3.182462000  | -2.636879000 | -1.463505000 |
| 15 | 4.080668000  | 1.733052000  | 0.760504000  |
| 1  | 3.097024000  | 2.633776000  | 1.263502000  |
| 1  | 4.941219000  | 1.423445000  | 1.873608000  |
| 15 | 0.189301000  | -1.847997000 | -1.912264000 |
| 1  | -0.790519000 | -0.856077000 | -2.201255000 |
| 1  | 0.459823000  | -2.541147000 | -3.138501000 |
| 14 | 0.000474000  | 2.279406000  | 0.001355000  |
| 14 | -1.450500000 | 0.564564000  | 0.378468000  |
| 6  | -3.277041000 | 0.444124000  | 0.015404000  |
| 6  | -3.821174000 | -0.809214000 | 0.496628000  |
| 6  | -2.899699000 | -1.651834000 | 1.081540000  |
| 6  | -1.549687000 | -1.128203000 | 1.158548000  |
| 1  | -4.875533000 | -1.083844000 | 0.410693000  |
| 1  | -3.183681000 | -2.636979000 | 1.461046000  |
| 15 | -0.190736000 | -1.847821000 | 1.913497000  |
| 1  | -0.461752000 | -2.539089000 | 3.140729000  |
| 1  | 0.619270000  | -2.840829000 | 1.244949000  |
| 15 | -4.079312000 | 1.734264000  | -0.761483000 |
| 1  | -3.094971000 | 2.635097000  | -1.262964000 |
| 1  | -4.938723000 | 1.425206000  | -1.875625000 |
| 1  | 0.789233000  | -0.855587000 | 2.201047000  |

|   |              |              |              |
|---|--------------|--------------|--------------|
| 1 | -4.975159000 | 2.629012000  | -0.062326000 |
| 1 | 4.975876000  | 2.628039000  | 0.060805000  |
| 1 | -0.621028000 | -2.839482000 | -1.241825000 |

**5Si(Me), T. E. = -3019.95238**

|    |              |              |              |
|----|--------------|--------------|--------------|
| 6  | -3.649738000 | 1.324653000  | 0.763581000  |
| 6  | -2.630135000 | 1.949134000  | 1.455346000  |
| 6  | -1.309378000 | 1.811843000  | 0.874908000  |
| 14 | -1.380908000 | 0.715379000  | -0.639626000 |
| 6  | -3.238664000 | 0.609142000  | -0.429475000 |
| 1  | -4.690340000 | 1.403444000  | 1.096202000  |
| 1  | -2.833216000 | 2.528677000  | 2.361493000  |
| 15 | -4.360198000 | -0.249424000 | -1.416898000 |
| 15 | 0.080421000  | 2.629491000  | 1.504021000  |
| 14 | 0.010211000  | -0.127717000 | -2.255657000 |
| 14 | 1.381722000  | -0.686780000 | -0.510403000 |
| 6  | 3.222943000  | -0.451729000 | -0.255896000 |
| 6  | 3.647098000  | -1.106040000 | 0.966950000  |
| 6  | 2.639460000  | -1.726652000 | 1.681400000  |
| 6  | 1.327320000  | -1.677862000 | 1.070885000  |
| 1  | 4.681862000  | -1.112032000 | 1.324408000  |
| 1  | 2.843372000  | -2.219590000 | 2.637385000  |
| 15 | -0.060938000 | -2.489750000 | 1.711914000  |
| 15 | 4.337118000  | 0.108313000  | -1.449230000 |
| 6  | -0.391659000 | 4.137390000  | 2.459220000  |
| 1  | -0.987306000 | 4.800357000  | 1.818204000  |
| 1  | -0.994287000 | 3.851956000  | 3.331993000  |
| 1  | 0.510645000  | 4.662903000  | 2.803054000  |
| 6  | 1.199524000  | 3.206589000  | 0.171049000  |
| 1  | 1.364328000  | 2.355884000  | -0.510196000 |
| 1  | 0.702535000  | 4.012863000  | -0.384984000 |
| 1  | 2.154643000  | 3.556598000  | 0.588346000  |
| 6  | 1.172898000  | 1.699877000  | 2.676417000  |
| 1  | 1.551263000  | 0.792804000  | 2.179657000  |
| 1  | 2.016508000  | 2.324579000  | 3.007393000  |
| 1  | 0.572705000  | 1.404252000  | 3.548718000  |
| 6  | -1.265576000 | -1.477948000 | 2.686881000  |
| 1  | -2.126738000 | -2.084904000 | 3.005219000  |
| 1  | -0.748533000 | -1.082011000 | 3.572403000  |
| 1  | -1.607704000 | -0.631734000 | 2.070708000  |
| 6  | -1.054641000 | -3.277252000 | 0.385667000  |
| 1  | -2.032058000 | -3.607901000 | 0.765521000  |
| 1  | -1.177889000 | -2.531486000 | -0.419629000 |
| 1  | -0.491651000 | -4.131600000 | -0.014064000 |
| 6  | 0.417659000  | -3.845162000 | 2.867748000  |



|   |              |              |              |
|---|--------------|--------------|--------------|
| 1 | -0.476454000 | -4.393545000 | 3.196332000  |
| 1 | 1.106667000  | -4.529981000 | 2.356412000  |
| 1 | 0.922435000  | -3.423869000 | 3.747772000  |
| 6 | 4.978057000  | -1.185122000 | -2.619992000 |
| 1 | 4.124778000  | -1.585664000 | -3.184256000 |
| 1 | 5.725780000  | -0.774543000 | -3.316015000 |
| 1 | 5.423745000  | -2.000479000 | -2.033525000 |
| 6 | 3.621263000  | 1.400769000  | -2.532957000 |
| 1 | 2.581551000  | 1.113674000  | -2.781071000 |
| 1 | 3.595499000  | 2.356156000  | -1.992300000 |
| 1 | 4.218258000  | 1.509408000  | -3.449365000 |
| 6 | 5.881186000  | 0.820339000  | -0.724074000 |
| 1 | 6.555028000  | 1.172582000  | -1.518164000 |
| 1 | 5.613828000  | 1.657657000  | -0.066147000 |
| 1 | 6.396853000  | 0.054378000  | -0.128910000 |
| 6 | -3.611684000 | -0.797972000 | -2.990903000 |
| 1 | -4.244321000 | -1.559675000 | -3.469054000 |
| 1 | -3.495003000 | 0.063849000  | -3.660997000 |
| 1 | -2.600375000 | -1.196563000 | -2.785272000 |
| 6 | -5.087756000 | -1.780330000 | -0.648884000 |
| 1 | -5.535503000 | -1.509089000 | 0.317427000  |
| 1 | -5.853899000 | -2.237333000 | -1.293208000 |
| 1 | -4.276756000 | -2.498799000 | -0.471260000 |
| 6 | -5.878274000 | 0.720489000  | -1.857527000 |
| 1 | -6.560240000 | 0.125604000  | -2.483372000 |
| 1 | -6.399868000 | 1.021354000  | -0.938274000 |
| 1 | -5.569961000 | 1.625065000  | -2.398123000 |

**6Ge, T. E.= -6765.27152**

|    |              |              |              |
|----|--------------|--------------|--------------|
| 32 | 0.000054000  | -2.060583000 | 0.000024000  |
| 32 | -1.535458000 | -0.203433000 | 0.148783000  |
| 32 | 1.535506000  | -0.203389000 | -0.148790000 |
| 7  | -1.949056000 | 1.305743000  | 1.201391000  |
| 7  | -3.298107000 | -0.032303000 | -0.497907000 |
| 7  | 3.298230000  | -0.032252000 | 0.497679000  |
| 7  | 1.948825000  | 1.306016000  | -1.201174000 |
| 6  | -3.221618000 | 1.782835000  | 0.948993000  |
| 1  | -3.571341000 | 2.691728000  | 1.438378000  |
| 6  | -3.954651000 | 1.051405000  | 0.052619000  |
| 1  | -4.977086000 | 1.283438000  | -0.245281000 |
| 6  | 3.221404000  | 1.783139000  | -0.948890000 |
| 1  | 3.570994000  | 2.692136000  | -1.438174000 |
| 6  | 3.954622000  | 1.051596000  | -0.052764000 |
| 1  | 4.977091000  | 1.283635000  | 0.245011000  |
| 6  | -1.069018000 | 1.974765000  | 2.148821000  |

|   |              |              |              |
|---|--------------|--------------|--------------|
| 6 | -3.945790000 | -0.889089000 | -1.481017000 |
| 6 | 1.068609000  | 1.975164000  | -2.148347000 |
| 6 | 3.946122000  | -0.889178000 | 1.480527000  |
| 1 | -4.376632000 | -0.292973000 | -2.303540000 |
| 1 | 4.377119000  | -0.293179000 | 2.303051000  |
| 1 | 0.170569000  | 1.359634000  | -2.303847000 |
| 1 | -0.747553000 | 2.966634000  | 1.786903000  |
| 1 | -3.201706000 | -1.576862000 | -1.908696000 |
| 1 | -4.750704000 | -1.493081000 | -1.027811000 |
| 1 | 3.202132000  | -1.577023000 | 1.908257000  |
| 1 | 4.750953000  | -1.493096000 | 1.027074000  |
| 1 | -1.572926000 | 2.102480000  | 3.121717000  |
| 1 | -0.170999000 | 1.359222000  | 2.304390000  |
| 1 | 0.747193000  | 2.966972000  | -1.786221000 |
| 1 | 1.572339000  | 2.103035000  | -3.121317000 |

**7Ge, T. E. = -8871.82118**

|    |              |              |              |
|----|--------------|--------------|--------------|
| 6  | 4.183225000  | 1.310630000  | -0.785031000 |
| 6  | 2.681886000  | 1.294558000  | -1.195303000 |
| 32 | 1.869296000  | -0.053014000 | 0.079909000  |
| 6  | 3.687088000  | -0.766533000 | 0.614125000  |
| 6  | 4.667468000  | -0.104483000 | -0.396388000 |
| 1  | 4.328495000  | 1.988462000  | 0.075401000  |
| 32 | 0.000001000  | -1.532446000 | -0.000002000 |
| 1  | 5.693069000  | -0.048930000 | 0.008618000  |
| 32 | -1.869297000 | -0.053016000 | -0.079909000 |
| 6  | -3.687091000 | -0.766526000 | -0.614131000 |
| 6  | -4.667468000 | -0.104482000 | 0.396389000  |
| 6  | -4.183223000 | 1.310628000  | 0.785040000  |
| 6  | -2.681885000 | 1.294551000  | 1.195311000  |
| 1  | -4.728893000 | -0.720820000 | 1.311026000  |
| 1  | -4.810939000 | 1.709046000  | 1.601478000  |
| 14 | 3.987849000  | -0.180896000 | 2.411714000  |
| 1  | 3.711886000  | 1.288480000  | 2.575047000  |
| 1  | 3.100129000  | -0.927672000 | 3.361668000  |
| 1  | 5.425958000  | -0.420795000 | 2.783222000  |
| 14 | 3.728920000  | -2.669332000 | 0.555404000  |
| 1  | 2.614865000  | -3.250182000 | 1.375874000  |
| 1  | 3.593209000  | -3.127386000 | -0.868067000 |
| 1  | 5.031069000  | -3.197133000 | 1.097015000  |
| 14 | 1.881101000  | 3.016565000  | -1.097820000 |
| 1  | 0.411528000  | 2.936479000  | -1.381171000 |
| 1  | 2.102573000  | 3.611434000  | 0.263203000  |
| 1  | 2.505177000  | 3.932891000  | -2.114937000 |
| 14 | 2.419203000  | 0.601217000  | -2.966345000 |

|    |              |              |              |
|----|--------------|--------------|--------------|
| 1  | 2.844191000  | -0.833459000 | -3.089514000 |
| 1  | 0.976786000  | 0.711086000  | -3.353562000 |
| 1  | 3.255937000  | 1.413300000  | -3.920291000 |
| 14 | -1.881091000 | 3.016553000  | 1.097836000  |
| 1  | -2.102570000 | 3.611435000  | -0.263180000 |
| 1  | -2.505150000 | 3.932876000  | 2.114967000  |
| 1  | -0.411516000 | 2.936454000  | 1.381173000  |
| 14 | -2.419205000 | 0.601200000  | 2.966351000  |
| 1  | -3.255939000 | 1.413280000  | 3.920299000  |
| 1  | -2.844196000 | -0.833476000 | 3.089512000  |
| 1  | -0.976789000 | 0.711065000  | 3.353571000  |
| 14 | -3.987849000 | -0.180872000 | -2.411715000 |
| 1  | -5.425962000 | -0.420756000 | -2.783223000 |
| 1  | -3.711874000 | 1.288503000  | -2.575039000 |
| 1  | -3.100137000 | -0.927649000 | -3.361675000 |
| 14 | -3.728927000 | -2.669326000 | -0.555426000 |
| 1  | -3.593215000 | -3.127393000 | 0.868042000  |
| 1  | -5.031078000 | -3.197119000 | -1.097040000 |
| 1  | -2.614874000 | -3.250170000 | -1.375903000 |
| 1  | -5.693071000 | -0.048927000 | -0.008614000 |
| 1  | -4.328493000 | 1.988465000  | -0.075389000 |
| 1  | 4.728895000  | -0.720815000 | -1.311028000 |
| 1  | 4.810941000  | 1.709052000  | -1.601467000 |

**8Ge, T. E.= -6920.04720**

|    |              |              |              |
|----|--------------|--------------|--------------|
| 6  | -3.485580000 | 1.833876000  | -0.626804000 |
| 7  | -2.206827000 | 1.233754000  | -0.737168000 |
| 32 | -1.726021000 | -0.421899000 | -0.028484000 |
| 7  | -3.405357000 | -1.048102000 | 0.484563000  |
| 6  | -4.528914000 | -0.246266000 | 0.377807000  |
| 6  | -4.576827000 | 1.026077000  | -0.094328000 |
| 32 | 0.079117000  | -1.998758000 | -0.107943000 |
| 1  | -5.453808000 | -0.709843000 | 0.737611000  |
| 1  | -5.550005000 | 1.517063000  | -0.074015000 |
| 32 | 1.614453000  | -0.164825000 | 0.100049000  |
| 7  | 3.381228000  | -0.392708000 | -0.434699000 |
| 6  | 4.458209000  | 0.478836000  | -0.159668000 |
| 6  | 4.163534000  | 1.700635000  | 0.580498000  |
| 6  | 2.979918000  | 2.098342000  | 1.111417000  |
| 7  | 1.766502000  | 1.423274000  | 1.064787000  |
| 1  | 5.011418000  | 2.369515000  | 0.730408000  |
| 1  | 2.941689000  | 3.049711000  | 1.652703000  |
| 6  | -3.719564000 | 3.116671000  | -1.032580000 |
| 1  | -4.729093000 | 3.518658000  | -0.960038000 |
| 1  | -2.952280000 | 3.773278000  | -1.433795000 |

|   |              |              |              |
|---|--------------|--------------|--------------|
| 6 | -1.175444000 | 2.003806000  | -1.425232000 |
| 1 | -1.539532000 | 2.314910000  | -2.419363000 |
| 1 | -0.891648000 | 2.911538000  | -0.864635000 |
| 1 | -0.279019000 | 1.381179000  | -1.563409000 |
| 6 | -3.566483000 | -2.392916000 | 1.034741000  |
| 1 | -4.060573000 | -3.070704000 | 0.317361000  |
| 1 | -2.578501000 | -2.812976000 | 1.278292000  |
| 1 | -4.159044000 | -2.367633000 | 1.964487000  |
| 6 | 3.673284000  | -1.580841000 | -1.231568000 |
| 1 | 4.351891000  | -2.266097000 | -0.694383000 |
| 1 | 2.738357000  | -2.117185000 | -1.454411000 |
| 1 | 4.147573000  | -1.301845000 | -2.188492000 |
| 6 | 0.655914000  | 1.982482000  | 1.834017000  |
| 1 | 0.958641000  | 2.157335000  | 2.879996000  |
| 1 | 0.296388000  | 2.933431000  | 1.405867000  |
| 1 | -0.182880000 | 1.271095000  | 1.842645000  |
| 6 | 5.734498000  | 0.215964000  | -0.566715000 |
| 1 | 6.522855000  | 0.930082000  | -0.333591000 |
| 1 | 6.021889000  | -0.679609000 | -1.111031000 |

**9Ge(H), T. E. = -6689.03055**

|    |              |              |              |
|----|--------------|--------------|--------------|
| 6  | -4.025215000 | -0.015472000 | -0.199866000 |
| 7  | -3.280351000 | -1.109579000 | -0.252589000 |
| 32 | -1.521660000 | -0.009463000 | -0.400681000 |
| 7  | -3.298354000 | 1.085324000  | -0.305174000 |
| 32 | 1.521667000  | 0.009337000  | -0.400678000 |
| 7  | 3.298413000  | -1.085360000 | -0.304862000 |
| 6  | 4.025223000  | 0.015499000  | -0.199859000 |
| 7  | 3.280310000  | 1.109564000  | -0.252884000 |
| 6  | -3.714628000 | -2.454908000 | 0.047232000  |
| 1  | -3.222414000 | -2.831707000 | 0.959884000  |
| 1  | -4.806248000 | -2.492909000 | 0.203746000  |
| 1  | -3.460911000 | -3.139735000 | -0.777805000 |
| 6  | -3.800388000 | 2.434405000  | -0.427491000 |
| 1  | -3.237625000 | 3.108432000  | 0.236867000  |
| 1  | -3.697211000 | 2.815231000  | -1.458804000 |
| 1  | -4.866875000 | 2.488336000  | -0.148134000 |
| 6  | 3.714432000  | 2.454909000  | 0.047127000  |
| 1  | 4.806097000  | 2.493075000  | 0.203290000  |
| 1  | 3.460317000  | 3.139854000  | -0.777682000 |
| 1  | 3.222444000  | 2.831427000  | 0.960021000  |
| 6  | 3.800543000  | -2.434390000 | -0.427379000 |
| 1  | 4.866987000  | -2.488323000 | -0.147853000 |
| 1  | 3.237700000  | -3.108563000 | 0.236757000  |
| 1  | 3.697557000  | -2.815027000 | -1.458784000 |

|    |              |              |              |
|----|--------------|--------------|--------------|
| 1  | 5.121153000  | 0.021970000  | -0.076272000 |
| 1  | -5.121145000 | -0.021858000 | -0.076268000 |
| 32 | 0.000000000  | 0.000140000  | 1.451629000  |
| 1  | 1.337332000  | 0.034450000  | -1.958804000 |
| 1  | -1.337316000 | -0.035014000 | -1.958799000 |

**9Ge(Me), T. E.= -6767.64038**

|    |              |              |              |
|----|--------------|--------------|--------------|
| 6  | 4.038051000  | 0.060030000  | -0.352614000 |
| 7  | 3.354090000  | -1.064679000 | -0.199086000 |
| 32 | 1.624143000  | -0.049651000 | 0.357949000  |
| 7  | 3.339983000  | 1.123526000  | 0.009211000  |
| 32 | -1.623888000 | 0.042186000  | 0.357700000  |
| 7  | -3.346748000 | -1.115986000 | -0.004898000 |
| 6  | -4.038536000 | -0.044085000 | -0.353533000 |
| 7  | -3.347600000 | 1.074592000  | -0.187210000 |
| 6  | 3.792364000  | -2.388913000 | -0.573400000 |
| 1  | 3.054633000  | -2.856216000 | -1.246317000 |
| 1  | 4.762605000  | -2.354059000 | -1.098232000 |
| 1  | 3.903906000  | -3.042733000 | 0.308752000  |
| 6  | 3.745292000  | 2.500182000  | -0.152206000 |
| 1  | 3.019450000  | 3.040517000  | -0.782907000 |
| 1  | 3.795948000  | 3.018995000  | 0.820080000  |
| 1  | 4.737382000  | 2.572294000  | -0.630950000 |
| 6  | -3.772493000 | 2.403865000  | -0.559313000 |
| 1  | -4.745410000 | 2.380210000  | -1.079794000 |
| 1  | -3.872788000 | 3.057952000  | 0.323872000  |
| 1  | -3.032596000 | 2.863718000  | -1.235139000 |
| 6  | -3.767131000 | -2.487965000 | -0.166922000 |
| 1  | -4.757812000 | -2.548969000 | -0.650134000 |
| 1  | -3.044767000 | -3.036673000 | -0.794168000 |
| 1  | -3.828239000 | -3.006076000 | 0.805260000  |
| 1  | -5.067550000 | -0.076035000 | -0.751113000 |
| 1  | 5.066495000  | 0.102938000  | -0.750625000 |
| 32 | 0.000344000  | -0.000051000 | -1.407242000 |
| 6  | -1.764276000 | 0.184160000  | 2.351253000  |
| 1  | -1.236817000 | 1.081888000  | 2.701221000  |
| 1  | -2.825704000 | 0.251820000  | 2.624232000  |
| 1  | -1.318939000 | -0.698099000 | 2.830321000  |
| 6  | 1.764924000  | -0.211474000 | 2.349969000  |
| 1  | 1.313579000  | 0.662818000  | 2.837946000  |
| 1  | 1.243464000  | -1.116280000 | 2.690569000  |
| 1  | 2.826728000  | -0.274493000 | 2.622599000  |

**9Ge(Cl), T. E.= -7608.45438**

|    |              |              |              |
|----|--------------|--------------|--------------|
| 6  | 4.009687000  | -0.213743000 | 0.513628000  |
| 7  | 3.120278000  | 0.397426000  | 1.269400000  |
| 32 | 1.627125000  | 0.002192000  | -0.161701000 |
| 7  | 3.483573000  | -0.637356000 | -0.636684000 |
| 32 | -1.628637000 | -0.020245000 | 0.175283000  |
| 7  | -3.497208000 | -0.723715000 | 0.492557000  |
| 6  | -3.989480000 | -0.123782000 | -0.591875000 |
| 7  | -3.077670000 | 0.594434000  | -1.215243000 |
| 6  | 3.265964000  | 0.749841000  | 2.664241000  |
| 1  | 2.604021000  | 0.130856000  | 3.292059000  |
| 1  | 4.305204000  | 0.602723000  | 3.003707000  |
| 1  | 2.991422000  | 1.804278000  | 2.819017000  |
| 6  | 4.212208000  | -1.084896000 | -1.804733000 |
| 1  | 3.673752000  | -1.914234000 | -2.285940000 |
| 1  | 4.328068000  | -0.275032000 | -2.545280000 |
| 1  | 5.215908000  | -1.443702000 | -1.521829000 |
| 6  | -3.189654000 | 1.200799000  | -2.522412000 |
| 1  | -4.215872000 | 1.107829000  | -2.916397000 |
| 1  | -2.929577000 | 2.269054000  | -2.468860000 |
| 1  | -2.499140000 | 0.718482000  | -3.233492000 |
| 6  | -4.254315000 | -1.387575000 | 1.531847000  |
| 1  | -5.260355000 | -1.654506000 | 1.167687000  |
| 1  | -3.743171000 | -2.311926000 | 1.838961000  |
| 1  | -4.366703000 | -0.745843000 | 2.422347000  |
| 1  | -5.033067000 | -0.235422000 | -0.927470000 |
| 1  | 5.062320000  | -0.376569000 | 0.796185000  |
| 32 | 0.000080000  | -1.762193000 | -0.110188000 |
| 17 | -1.639773000 | 1.878901000  | 1.364410000  |
| 17 | 1.603522000  | 2.064189000  | -1.038743000 |

**9Ge(NMe<sub>2</sub>), T. E. = -6956.92908**

|    |              |              |              |
|----|--------------|--------------|--------------|
| 6  | -3.968475000 | -0.751124000 | 0.643657000  |
| 7  | -3.505700000 | -1.027726000 | -0.562424000 |
| 32 | -1.699026000 | -0.023605000 | -0.171993000 |
| 7  | -3.195288000 | 0.104841000  | 1.302310000  |
| 32 | 1.698906000  | -0.023520000 | 0.171915000  |
| 7  | 3.195293000  | 0.104510000  | -1.302179000 |
| 6  | 3.968425000  | -0.751360000 | -0.643305000 |
| 7  | 3.505560000  | -1.027783000 | 0.562765000  |
| 6  | -4.156704000 | -1.849371000 | -1.557261000 |
| 1  | -3.440641000 | -2.578222000 | -1.968150000 |
| 1  | -5.005991000 | -2.405696000 | -1.123539000 |
| 1  | -4.536575000 | -1.242421000 | -2.397276000 |

|    |              |              |              |
|----|--------------|--------------|--------------|
| 6  | -3.241942000 | 0.311172000  | 2.736005000  |
| 1  | -2.399471000 | -0.200434000 | 3.233621000  |
| 1  | -3.175730000 | 1.384426000  | 2.973347000  |
| 1  | -4.180989000 | -0.079478000 | 3.164486000  |
| 6  | 4.156679000  | -1.848979000 | 1.557889000  |
| 1  | 5.005466000  | -2.406073000 | 1.124166000  |
| 1  | 4.537281000  | -1.241620000 | 2.397285000  |
| 1  | 3.440439000  | -2.577157000 | 1.969650000  |
| 6  | 3.241830000  | 0.310258000  | -2.735966000 |
| 1  | 4.181049000  | -0.080154000 | -3.164290000 |
| 1  | 2.399581000  | -0.201906000 | -3.233389000 |
| 1  | 3.175164000  | 1.383386000  | -2.973738000 |
| 1  | 4.883146000  | -1.199613000 | -1.067375000 |
| 1  | -4.883161000 | -1.199317000 | 1.067855000  |
| 32 | -0.000010000 | -1.727768000 | 0.000031000  |
| 7  | 1.841167000  | 1.697216000  | 0.872559000  |
| 7  | -1.841333000 | 1.696787000  | -0.873324000 |
| 6  | -0.907588000 | 2.145023000  | -1.894881000 |
| 1  | -0.473614000 | 3.129847000  | -1.636054000 |
| 1  | -0.082197000 | 1.424004000  | -1.993698000 |
| 1  | -1.396344000 | 2.241831000  | -2.887194000 |
| 6  | 3.034015000  | 2.520477000  | 0.766629000  |
| 1  | 3.614673000  | 2.540625000  | 1.713232000  |
| 1  | 3.685676000  | 2.142857000  | -0.032548000 |
| 1  | 2.766620000  | 3.568008000  | 0.524359000  |
| 6  | 0.908218000  | 2.145216000  | 1.894973000  |
| 1  | 1.397396000  | 2.240744000  | 2.887209000  |
| 1  | 0.475002000  | 3.130637000  | 1.637184000  |
| 1  | 0.082259000  | 1.424804000  | 1.993440000  |
| 6  | -3.033863000 | 2.520481000  | -0.767367000 |
| 1  | -2.766244000 | 3.567688000  | -0.523913000 |
| 1  | -3.613838000 | 2.541763000  | -1.714354000 |
| 1  | -3.686250000 | 2.142392000  | 0.030999000  |

**<sup>9</sup>Ge(PMe<sub>2</sub>), T. E. =-7530.22612**

|    |              |              |              |
|----|--------------|--------------|--------------|
| 6  | -4.037107000 | -0.804370000 | 0.774481000  |
| 7  | -3.512735000 | -1.217381000 | -0.372352000 |
| 32 | -1.758243000 | -0.195472000 | -0.126755000 |
| 7  | -3.240509000 | 0.025008000  | 1.425764000  |
| 32 | 1.615366000  | -0.289896000 | 0.019139000  |
| 7  | 3.196537000  | -0.304765000 | -1.458723000 |
| 6  | 3.960104000  | -0.979173000 | -0.624091000 |
| 7  | 3.402020000  | -1.129088000 | 0.575367000  |
| 6  | -4.211448000 | -1.919941000 | -1.425111000 |
| 1  | -3.557702000 | -2.694471000 | -1.853869000 |

|    |              |              |              |
|----|--------------|--------------|--------------|
| 1  | -5.118217000 | -2.410947000 | -1.032074000 |
| 1  | -4.513819000 | -1.237266000 | -2.238577000 |
| 6  | -3.387536000 | 0.389330000  | 2.817132000  |
| 1  | -2.620368000 | -0.104992000 | 3.438431000  |
| 1  | -3.273814000 | 1.477122000  | 2.947735000  |
| 1  | -4.380254000 | 0.099415000  | 3.204946000  |
| 6  | 3.929395000  | -1.925924000 | 1.661633000  |
| 1  | 4.862474000  | -2.431498000 | 1.359600000  |
| 1  | 4.146899000  | -1.307426000 | 2.548515000  |
| 1  | 3.201335000  | -2.697511000 | 1.961118000  |
| 6  | 3.482908000  | -0.067671000 | -2.854235000 |
| 1  | 4.438130000  | -0.533245000 | -3.155308000 |
| 1  | 2.682305000  | -0.489788000 | -3.483697000 |
| 1  | 3.544760000  | 1.011894000  | -3.071892000 |
| 1  | 4.947532000  | -1.397864000 | -0.884644000 |
| 1  | -5.024056000 | -1.133690000 | 1.143134000  |
| 32 | -0.108378000 | -1.957352000 | 0.044768000  |
| 15 | 1.704402000  | 1.991520000  | 0.726188000  |
| 15 | -2.390064000 | 1.787824000  | -1.326374000 |
| 6  | -0.880109000 | 2.068636000  | -2.412768000 |
| 1  | 0.047411000  | 2.174396000  | -1.830923000 |
| 1  | -0.772787000 | 1.232137000  | -3.117039000 |
| 1  | -1.042021000 | 2.989345000  | -2.994967000 |
| 6  | 3.522014000  | 2.435619000  | 0.527775000  |
| 1  | 4.194684000  | 1.651667000  | 0.906502000  |
| 1  | 3.740321000  | 2.611911000  | -0.533811000 |
| 1  | 3.716443000  | 3.369722000  | 1.077120000  |
| 6  | 1.654739000  | 1.710447000  | 2.590672000  |
| 1  | 2.490448000  | 1.094822000  | 2.955037000  |
| 1  | 1.685487000  | 2.688193000  | 3.096184000  |
| 1  | 0.710375000  | 1.213770000  | 2.851777000  |
| 6  | -2.111177000 | 3.153787000  | -0.058965000 |
| 1  | -1.085862000 | 3.164456000  | 0.339564000  |
| 1  | -2.311848000 | 4.118280000  | -0.551501000 |
| 1  | -2.830646000 | 3.037590000  | 0.763034000  |

**10Ge(H), T. E. =-7911.51510**

|    |              |              |              |
|----|--------------|--------------|--------------|
| 6  | -3.931079000 | 1.176855000  | -0.418088000 |
| 6  | -2.986149000 | 1.991113000  | -1.010682000 |
| 6  | -1.655376000 | 1.446195000  | -1.128936000 |
| 32 | -1.562928000 | -0.334683000 | -0.341810000 |
| 6  | -3.457719000 | -0.098352000 | 0.063853000  |
| 1  | -4.972015000 | 1.499131000  | -0.326772000 |
| 1  | -3.252178000 | 2.988141000  | -1.373188000 |
| 15 | -4.342402000 | -1.341034000 | 0.823709000  |



|    |              |              |              |
|----|--------------|--------------|--------------|
| 1  | -3.433796000 | -2.291196000 | 1.371808000  |
| 1  | -5.214821000 | -0.972247000 | 1.909459000  |
| 15 | -0.291949000 | 2.136911000  | -1.898960000 |
| 1  | 0.647425000  | 1.115641000  | -2.227364000 |
| 1  | -0.566628000 | 2.864256000  | -3.105532000 |
| 32 | -0.000032000 | -2.149814000 | 0.000048000  |
| 32 | 1.562931000  | -0.334722000 | 0.341809000  |
| 6  | 3.457713000  | -0.098404000 | -0.063899000 |
| 6  | 3.931093000  | 1.176804000  | 0.418018000  |
| 6  | 2.986185000  | 1.991071000  | 1.010638000  |
| 6  | 1.655408000  | 1.446169000  | 1.128909000  |
| 1  | 4.972026000  | 1.499076000  | 0.326666000  |
| 1  | 3.252234000  | 2.988095000  | 1.373136000  |
| 15 | 0.292028000  | 2.136791000  | 1.899101000  |
| 1  | 0.566734000  | 2.863922000  | 3.105800000  |
| 1  | -0.574727000 | 3.083999000  | 1.232019000  |
| 15 | 4.342346000  | -1.341055000 | -0.823865000 |
| 1  | 3.433705000  | -2.291230000 | -1.371883000 |
| 1  | 5.214652000  | -0.972244000 | -1.909700000 |
| 1  | -0.647358000 | 1.115468000  | 2.227320000  |
| 1  | 5.266279000  | -2.211321000 | -0.122121000 |
| 1  | -5.266247000 | -2.211320000 | 0.121870000  |
| 1  | 0.574835000  | 3.083964000  | -1.231689000 |

**10Ge(Me), T. E. = -8383.23205**

|    |              |              |              |
|----|--------------|--------------|--------------|
| 6  | 3.836804000  | -0.923947000 | 1.198977000  |
| 6  | 2.846388000  | -1.548478000 | 1.939155000  |
| 6  | 1.532839000  | -1.596466000 | 1.348504000  |
| 32 | 1.518576000  | -0.654269000 | -0.361038000 |
| 6  | 3.425791000  | -0.331575000 | -0.050104000 |
| 1  | 4.867792000  | -0.890697000 | 1.567413000  |
| 1  | 3.078445000  | -1.988529000 | 2.914899000  |
| 15 | 4.519036000  | 0.267206000  | -1.239611000 |
| 15 | 0.184920000  | -2.432338000 | 2.039829000  |
| 32 | 0.012939000  | -0.175514000 | -2.217957000 |
| 32 | -1.524044000 | 0.670123000  | -0.523213000 |
| 6  | -3.436913000 | 0.418933000  | -0.192756000 |
| 6  | -3.826523000 | 1.088381000  | 1.024934000  |
| 6  | -2.828164000 | 1.768735000  | 1.701265000  |
| 6  | -1.515227000 | 1.753785000  | 1.103947000  |
| 1  | -4.857615000 | 1.107358000  | 1.395664000  |
| 1  | -3.056851000 | 2.317693000  | 2.621108000  |
| 15 | -0.187408000 | 2.704038000  | 1.669975000  |
| 15 | -4.524415000 | -0.471430000 | -1.184394000 |
| 6  | -0.842614000 | -3.237477000 | 0.753126000  |

|   |              |              |              |
|---|--------------|--------------|--------------|
| 1 | -1.031109000 | -2.493857000 | -0.041421000 |
| 1 | -0.278372000 | -4.075011000 | 0.321578000  |
| 1 | -1.792466000 | -3.592896000 | 1.177736000  |
| 6 | -1.013195000 | -1.448786000 | 3.054151000  |
| 1 | -1.457147000 | -0.661477000 | 2.424701000  |
| 1 | -1.806332000 | -2.094303000 | 3.461467000  |
| 1 | -0.465699000 | -0.975469000 | 3.881218000  |
| 6 | 0.727510000  | -3.775559000 | 3.184906000  |
| 1 | 1.249202000  | -3.338472000 | 4.047336000  |
| 1 | -0.142545000 | -4.343238000 | 3.544167000  |
| 1 | 1.416784000  | -4.445843000 | 2.655062000  |
| 6 | 3.742628000  | 1.536454000  | -2.311059000 |
| 1 | 4.326954000  | 1.681408000  | -3.230594000 |
| 1 | 2.714622000  | 1.212863000  | -2.558607000 |
| 1 | 3.680905000  | 2.482773000  | -1.757607000 |
| 6 | 5.216184000  | -0.985883000 | -2.423835000 |
| 1 | 5.700076000  | -1.785322000 | -1.845881000 |
| 1 | 4.380884000  | -1.420198000 | -2.990040000 |
| 1 | 5.942530000  | -0.535502000 | -3.118171000 |
| 6 | 6.030398000  | 1.045553000  | -0.512228000 |
| 1 | 5.724726000  | 1.855690000  | 0.162843000  |
| 1 | 6.587884000  | 0.295599000  | 0.065372000  |
| 1 | 6.680611000  | 1.446749000  | -1.302827000 |
| 6 | -5.186552000 | -2.034700000 | -0.423964000 |
| 1 | -5.633209000 | -1.787053000 | 0.549132000  |
| 1 | -5.942687000 | -2.514438000 | -1.063399000 |
| 1 | -4.347550000 | -2.723771000 | -0.259700000 |
| 6 | -6.083781000 | 0.428804000  | -1.643978000 |
| 1 | -6.744612000 | -0.201766000 | -2.257684000 |
| 1 | -6.614454000 | 0.728542000  | -0.729511000 |
| 1 | -5.808603000 | 1.333802000  | -2.201805000 |
| 6 | -3.739063000 | -0.977719000 | -2.756310000 |
| 1 | -2.722646000 | -1.360264000 | -2.547210000 |
| 1 | -4.345422000 | -1.747935000 | -3.254370000 |
| 1 | -3.638609000 | -0.104508000 | -3.414061000 |
| 6 | -0.752689000 | 4.174632000  | 2.634343000  |
| 1 | -1.428686000 | 4.775622000  | 2.012155000  |
| 1 | -1.294981000 | 3.844639000  | 3.530871000  |
| 1 | 0.110542000  | 4.782201000  | 2.941362000  |
| 6 | 1.044969000  | 1.894837000  | 2.793958000  |
| 1 | 1.866456000  | 2.585505000  | 3.037754000  |
| 1 | 0.535830000  | 1.591895000  | 3.719920000  |
| 1 | 1.446831000  | 0.998414000  | 2.296095000  |
| 6 | 0.816077000  | 3.364514000  | 0.282845000  |
| 1 | 0.223534000  | 4.116553000  | -0.255132000 |
| 1 | 1.752188000  | 3.806237000  | 0.653517000  |

1 1.032523000 2.529714000 -0.404927000

**1Si-H<sup>1+</sup>, T. E.= -1402.4149**

14 0.017385000 -0.416735000 2.073575000  
14 1.668240000 0.182112000 0.490790000  
14 -1.570602000 -0.169704000 0.345332000  
7 3.097054000 -0.746884000 0.090025000  
7 2.144098000 1.438549000 -0.638111000  
7 -2.250475000 -1.365162000 -0.741249000  
7 -3.012905000 0.818236000 0.199417000  
6 3.869150000 -0.084622000 -0.853484000  
1 4.800551000 -0.521778000 -1.207512000  
6 3.347333000 1.116006000 -1.250280000  
1 3.795192000 1.797368000 -1.971058000  
6 -3.906281000 0.245934000 -0.696854000  
1 -4.835602000 0.755010000 -0.944768000  
6 -3.485441000 -0.947173000 -1.216901000  
1 -4.020388000 -1.542807000 -1.953959000  
6 3.533210000 -2.035947000 0.644079000  
6 1.461132000 2.700829000 -0.943497000  
6 -3.327348000 2.092500000 0.858415000  
6 -1.662877000 -2.631938000 -1.192807000  
1 1.248902000 2.771039000 -2.020260000  
1 -1.461585000 -2.608137000 -2.273969000  
1 -2.481709000 2.403389000 1.484815000  
1 3.623435000 -2.787392000 -0.153788000  
1 0.511057000 2.744170000 -0.395928000  
1 2.077974000 3.558710000 -0.638720000  
1 -0.717465000 -2.809132000 -0.664308000  
1 -2.343843000 -3.465991000 -0.969864000  
1 4.503830000 -1.926998000 1.148956000  
1 2.796945000 -2.388419000 1.377563000  
1 -3.520074000 2.876907000 0.112033000  
1 -4.212474000 1.981135000 1.501450000  
1 -0.192742000 1.076784000 2.370959000

**2Si-H<sup>1+</sup>, T. E. =-3508.91046**

6 -4.267109000 1.152701000 0.243819000  
6 -2.743237000 1.549648000 0.253498000  
14 -1.921737000 -0.076457000 -0.194011000  
6 -3.386916000 -1.234306000 -0.013583000  
6 -4.453139000 -0.316562000 0.683930000  
1 -4.665566000 1.278145000 -0.777317000  
14 -0.033775000 -0.709198000 -1.313720000

|    |              |              |              |
|----|--------------|--------------|--------------|
| 1  | -5.477723000 | -0.654128000 | 0.458543000  |
| 14 | 1.890531000  | -0.159524000 | -0.198889000 |
| 6  | 3.190181000  | -1.439321000 | 0.249752000  |
| 6  | 4.517542000  | -0.606419000 | 0.212666000  |
| 6  | 4.243408000  | 0.859379000  | 0.615715000  |
| 6  | 2.939246000  | 1.391983000  | -0.079107000 |
| 1  | 4.932276000  | -0.632688000 | -0.810074000 |
| 1  | 5.107708000  | 1.494506000  | 0.363085000  |
| 14 | -3.962953000 | -1.794106000 | -1.777969000 |
| 1  | -4.313878000 | -0.594452000 | -2.605378000 |
| 1  | -2.859628000 | -2.553235000 | -2.445561000 |
| 1  | -5.172386000 | -2.659631000 | -1.599578000 |
| 14 | -3.013724000 | -2.813010000 | 1.026718000  |
| 1  | -2.066574000 | -3.706719000 | 0.289607000  |
| 1  | -2.409698000 | -2.394070000 | 2.334205000  |
| 1  | -4.309921000 | -3.520220000 | 1.274548000  |
| 14 | -2.367425000 | 2.985232000  | -0.972288000 |
| 1  | -0.887635000 | 3.155324000  | -1.119031000 |
| 1  | -2.976259000 | 2.636607000  | -2.296161000 |
| 1  | -2.973759000 | 4.249254000  | -0.444938000 |
| 14 | -2.191942000 | 2.062111000  | 2.036808000  |
| 1  | -2.288216000 | 0.891482000  | 2.970551000  |
| 1  | -0.775309000 | 2.540808000  | 2.008898000  |
| 1  | -3.113495000 | 3.149202000  | 2.494061000  |
| 14 | 2.264593000  | 2.934966000  | 0.841067000  |
| 1  | 2.041987000  | 2.570505000  | 2.277722000  |
| 1  | 3.293062000  | 4.019806000  | 0.748519000  |
| 1  | 0.986278000  | 3.395132000  | 0.217908000  |
| 14 | 3.276939000  | 1.890337000  | -1.931152000 |
| 1  | 4.476215000  | 2.786653000  | -1.926622000 |
| 1  | 3.558074000  | 0.672215000  | -2.761761000 |
| 1  | 2.071286000  | 2.585401000  | -2.478668000 |
| 14 | 2.737031000  | -1.973599000 | 2.062512000  |
| 1  | 3.985274000  | -2.502087000 | 2.697779000  |
| 1  | 2.239732000  | -0.794002000 | 2.851983000  |
| 1  | 1.657371000  | -3.007286000 | 2.024091000  |
| 14 | 3.291624000  | -3.019982000 | -0.841793000 |
| 1  | 3.675687000  | -2.606153000 | -2.230042000 |
| 1  | 4.345171000  | -3.917209000 | -0.268197000 |
| 1  | 1.974631000  | -3.728569000 | -0.856980000 |
| 1  | 5.283222000  | -1.046927000 | 0.871146000  |
| 1  | 4.122158000  | 0.921993000  | 1.711456000  |
| 1  | -4.340526000 | -0.388631000 | 1.779788000  |
| 1  | -4.853367000 | 1.823806000  | 0.892211000  |
| 1  | -0.074317000 | -2.182250000 | -0.967922000 |

**3Si-H<sup>1+</sup>, T. E.= -1557.17985**

|    |              |              |              |
|----|--------------|--------------|--------------|
| 6  | 3.174951000  | -1.099509000 | -1.220147000 |
| 7  | 2.130785000  | -1.170325000 | -0.237020000 |
| 14 | 1.571735000  | 0.166447000  | 0.698559000  |
| 7  | 2.599429000  | 1.495117000  | 0.298054000  |
| 6  | 3.595163000  | 1.327898000  | -0.688027000 |
| 6  | 3.847348000  | 0.186168000  | -1.364425000 |
| 14 | 0.039465000  | 0.034264000  | 2.479643000  |
| 1  | 4.182394000  | 2.226532000  | -0.889004000 |
| 1  | 4.647568000  | 0.218716000  | -2.103880000 |
| 14 | -1.558053000 | -0.029100000 | 0.744937000  |
| 7  | -2.226995000 | 1.178616000  | -0.292136000 |
| 6  | -3.299596000 | 0.945737000  | -1.222332000 |
| 6  | -3.810358000 | -0.417373000 | -1.309354000 |
| 6  | -3.435788000 | -1.487115000 | -0.574567000 |
| 7  | -2.449431000 | -1.473481000 | 0.433275000  |
| 1  | -4.591602000 | -0.579264000 | -2.052251000 |
| 1  | -3.908093000 | -2.458722000 | -0.733980000 |
| 6  | 3.533043000  | -2.170450000 | -1.969911000 |
| 1  | 4.341601000  | -2.064081000 | -2.691100000 |
| 1  | 3.064965000  | -3.148625000 | -1.899049000 |
| 6  | 1.507960000  | -2.485174000 | -0.034972000 |
| 1  | 0.997033000  | -2.821970000 | -0.950510000 |
| 1  | 2.273953000  | -3.226404000 | 0.240294000  |
| 1  | 0.776919000  | -2.429537000 | 0.783765000  |
| 6  | 2.537216000  | 2.817972000  | 0.944553000  |
| 1  | 2.361550000  | 3.603788000  | 0.194486000  |
| 1  | 1.720228000  | 2.841581000  | 1.676614000  |
| 1  | 3.478833000  | 3.027942000  | 1.473632000  |
| 6  | -1.699753000 | 2.550144000  | -0.237961000 |
| 1  | -2.492923000 | 3.251710000  | 0.062609000  |
| 1  | -0.889354000 | 2.607695000  | 0.499698000  |
| 1  | -1.312812000 | 2.849219000  | -1.224359000 |
| 6  | -2.291291000 | -2.713395000 | 1.213514000  |
| 1  | -3.245807000 | -2.986646000 | 1.687475000  |
| 1  | -1.960526000 | -3.540460000 | 0.567040000  |
| 1  | -1.547692000 | -2.563245000 | 2.007616000  |
| 6  | -3.810048000 | 1.935878000  | -1.994337000 |
| 1  | -4.618708000 | 1.702213000  | -2.684912000 |
| 1  | -3.468549000 | 2.967048000  | -1.969874000 |
| 1  | -0.022621000 | 1.565791000  | 2.414329000  |

**4Si(H)-H<sup>1+</sup>, T. E. =-1324.96179**

|   |              |             |              |
|---|--------------|-------------|--------------|
| 6 | -3.122386000 | 0.249906000 | -0.779887000 |
|---|--------------|-------------|--------------|

|    |              |              |              |
|----|--------------|--------------|--------------|
| 7  | -2.573217000 | -0.936237000 | -0.511749000 |
| 14 | -1.143995000 | -0.105256000 | 0.376309000  |
| 7  | -2.333977000 | 1.207994000  | -0.288670000 |
| 14 | 1.142995000  | -0.098797000 | 0.378441000  |
| 7  | 2.572336000  | -0.925873000 | -0.515943000 |
| 6  | 3.119010000  | 0.261592000  | -0.779548000 |
| 7  | 2.330650000  | 1.217131000  | -0.283415000 |
| 6  | -2.617376000 | 2.632415000  | -0.201572000 |
| 1  | -3.482987000 | 2.884380000  | -0.830958000 |
| 1  | -2.837753000 | 2.927502000  | 0.835327000  |
| 1  | -1.752904000 | 3.210748000  | -0.555121000 |
| 6  | 2.592745000  | 2.647089000  | -0.231653000 |
| 1  | 3.503409000  | 2.884463000  | -0.800152000 |
| 1  | 1.754798000  | 3.205382000  | -0.672116000 |
| 1  | 2.731194000  | 2.980907000  | 0.807315000  |
| 6  | 3.040835000  | -2.242260000 | -0.920231000 |
| 1  | 3.098476000  | -2.906208000 | -0.046563000 |
| 1  | 2.359516000  | -2.690310000 | -1.658557000 |
| 1  | 4.042414000  | -2.164318000 | -1.366741000 |
| 6  | -3.009712000 | -2.251818000 | -0.953938000 |
| 1  | -2.837833000 | -2.980612000 | -0.151039000 |
| 1  | -4.084330000 | -2.236634000 | -1.185861000 |
| 1  | -2.456874000 | -2.577083000 | -1.848583000 |
| 1  | -4.068948000 | 0.410985000  | -1.310583000 |
| 14 | -0.000356000 | -0.834086000 | 2.163252000  |
| 1  | 4.064074000  | 0.425326000  | -1.312167000 |
| 1  | -0.002531000 | -0.563240000 | 3.643178000  |

**4Si(Me)-H<sup>1+</sup>, T. E.= -1483.42435**

|    |              |              |              |
|----|--------------|--------------|--------------|
| 6  | -3.652969000 | 0.566656000  | -0.478098000 |
| 7  | -2.647550000 | 1.177190000  | 0.177375000  |
| 14 | -1.778032000 | -0.465829000 | 0.467350000  |
| 7  | -3.387959000 | -0.749681000 | -0.440026000 |
| 14 | 1.766067000  | -0.462836000 | 0.452753000  |
| 7  | 2.637041000  | 1.166019000  | 0.116247000  |
| 6  | 3.659363000  | 0.535199000  | -0.492599000 |
| 7  | 3.383807000  | -0.778072000 | -0.435947000 |
| 6  | -2.407822000 | 2.602577000  | 0.316890000  |
| 1  | -1.718955000 | 2.764715000  | 1.156281000  |
| 1  | -1.958024000 | 3.038848000  | -0.590245000 |
| 1  | -3.337833000 | 3.144142000  | 0.546217000  |
| 6  | -4.188765000 | -1.837856000 | -0.975487000 |
| 1  | -3.528555000 | -2.684560000 | -1.205514000 |
| 1  | -4.948711000 | -2.178946000 | -0.253488000 |
| 1  | -4.694156000 | -1.539755000 | -1.906056000 |

|    |              |              |              |
|----|--------------|--------------|--------------|
| 6  | 4.128230000  | -1.888233000 | -1.009307000 |
| 1  | 4.516325000  | -1.642718000 | -2.009120000 |
| 1  | 4.967449000  | -2.192581000 | -0.363639000 |
| 1  | 3.449525000  | -2.744505000 | -1.115872000 |
| 6  | 2.494788000  | 2.588344000  | 0.364237000  |
| 1  | 2.924613000  | 3.182033000  | -0.456535000 |
| 1  | 1.426199000  | 2.833564000  | 0.429946000  |
| 1  | 2.978002000  | 2.892790000  | 1.307616000  |
| 6  | 4.851787000  | 1.183189000  | -1.110782000 |
| 1  | 4.541421000  | 1.955170000  | -1.831025000 |
| 1  | 5.459081000  | 1.678396000  | -0.337149000 |
| 1  | 5.482010000  | 0.450810000  | -1.628422000 |
| 6  | -4.824692000 | 1.209326000  | -1.140215000 |
| 1  | -5.763306000 | 0.756548000  | -0.788465000 |
| 1  | -4.856563000 | 2.287407000  | -0.944814000 |
| 1  | -4.772384000 | 1.056909000  | -2.230023000 |
| 14 | -0.010336000 | -1.316935000 | -0.780201000 |
| 6  | 2.002257000  | -0.885751000 | 2.280705000  |
| 1  | 1.767509000  | -1.944698000 | 2.464342000  |
| 1  | 3.038655000  | -0.696971000 | 2.595671000  |
| 1  | 1.335231000  | -0.282665000 | 2.914788000  |
| 6  | -2.013241000 | -0.922563000 | 2.286602000  |
| 1  | -1.800100000 | -1.990070000 | 2.445707000  |
| 1  | -1.328695000 | -0.348432000 | 2.928878000  |
| 1  | -3.042782000 | -0.716239000 | 2.612574000  |
| 1  | -0.014756000 | -0.254310000 | -1.875501000 |

**4Si(Cl)-H<sup>+</sup>, T. E.= -2245.60006**

|    |              |              |              |
|----|--------------|--------------|--------------|
| 6  | -3.660489000 | 0.782002000  | -0.788539000 |
| 7  | -2.638173000 | 1.415076000  | -0.208826000 |
| 14 | -1.746456000 | -0.227809000 | 0.015657000  |
| 7  | -3.417158000 | -0.527404000 | -0.778120000 |
| 14 | 1.746461000  | -0.227471000 | 0.015381000  |
| 7  | 2.637937000  | 1.415656000  | -0.209260000 |
| 6  | 3.660211000  | 0.782658000  | -0.789134000 |
| 7  | 3.417083000  | -0.526780000 | -0.778484000 |
| 6  | -2.476312000 | 2.844110000  | -0.000203000 |
| 1  | -1.601989000 | 3.220451000  | -0.551353000 |
| 1  | -3.367646000 | 3.379463000  | -0.357122000 |
| 1  | -2.345086000 | 3.061673000  | 1.069707000  |
| 6  | -4.252272000 | -1.605642000 | -1.286440000 |
| 1  | -3.697501000 | -2.202558000 | -2.024184000 |
| 1  | -4.566756000 | -2.264455000 | -0.464118000 |
| 1  | -5.147871000 | -1.191513000 | -1.770762000 |
| 6  | 4.254384000  | -1.605500000 | -1.282162000 |

|    |              |              |              |
|----|--------------|--------------|--------------|
| 1  | 5.148570000  | -1.191635000 | -1.769311000 |
| 1  | 4.571121000  | -2.259723000 | -0.457006000 |
| 1  | 3.700267000  | -2.207095000 | -2.016537000 |
| 6  | 2.473777000  | 2.845140000  | -0.005552000 |
| 1  | 3.365985000  | 3.380355000  | -0.360503000 |
| 1  | 1.601212000  | 3.219121000  | -0.561142000 |
| 1  | 2.338291000  | 3.065558000  | 1.063217000  |
| 1  | 4.551062000  | 1.264772000  | -1.212112000 |
| 1  | -4.551486000 | 1.263901000  | -1.211459000 |
| 14 | 0.000009000  | -1.121879000 | -1.252096000 |
| 17 | 1.922174000  | -0.741168000 | 2.019740000  |
| 17 | -1.921703000 | -0.742208000 | 2.019848000  |
| 1  | -0.000003000 | 0.066844000  | -2.220477000 |

**4Si(NMe<sub>2</sub>)-H<sup>+</sup>, T. E.= -1594.11949**

|    |              |              |              |
|----|--------------|--------------|--------------|
| 6  | -2.742167000 | -1.814280000 | 0.700878000  |
| 7  | -2.884321000 | -1.503833000 | -0.581358000 |
| 14 | -1.766304000 | 0.040460000  | -0.335456000 |
| 7  | -2.056013000 | -0.841139000 | 1.310635000  |
| 14 | 1.756702000  | 0.160943000  | -0.167516000 |
| 7  | 3.389026000  | -0.426793000 | -0.978076000 |
| 6  | 3.438380000  | -1.461514000 | -0.150363000 |
| 7  | 2.467269000  | -1.334770000 | 0.760915000  |
| 6  | -3.398751000 | -2.361046000 | -1.637841000 |
| 1  | -2.587803000 | -2.678834000 | -2.311174000 |
| 1  | -3.870836000 | -3.257617000 | -1.209534000 |
| 1  | -4.149190000 | -1.818740000 | -2.229800000 |
| 6  | -1.776888000 | -0.723349000 | 2.731929000  |
| 1  | -0.706865000 | -0.535733000 | 2.900118000  |
| 1  | -2.343946000 | 0.107980000  | 3.179449000  |
| 1  | -2.052278000 | -1.651858000 | 3.253728000  |
| 6  | 2.064326000  | -2.335672000 | 1.734615000  |
| 1  | 2.844479000  | -3.104214000 | 1.837550000  |
| 1  | 1.913410000  | -1.867949000 | 2.718009000  |
| 1  | 1.128093000  | -2.830817000 | 1.431688000  |
| 6  | 4.252644000  | -0.160288000 | -2.116970000 |
| 1  | 4.986533000  | -0.970081000 | -2.241253000 |
| 1  | 3.656184000  | -0.083777000 | -3.037997000 |
| 1  | 4.794455000  | 0.786697000  | -1.976270000 |
| 1  | 4.144398000  | -2.300209000 | -0.212179000 |
| 1  | -3.102168000 | -2.733361000 | 1.182576000  |
| 14 | 0.077533000  | -0.025206000 | -1.794121000 |
| 7  | -2.650467000 | 1.522738000  | -0.271324000 |
| 7  | 1.972577000  | 1.572495000  | 0.799787000  |
| 6  | -2.395390000 | 2.640819000  | -1.187135000 |



|   |              |              |              |
|---|--------------|--------------|--------------|
| 1 | -2.211012000 | 3.571351000  | -0.622725000 |
| 1 | -1.521018000 | 2.432532000  | -1.819387000 |
| 1 | -3.261101000 | 2.810456000  | -1.851212000 |
| 6 | -3.855851000 | 1.716543000  | 0.540583000  |
| 1 | -4.017409000 | 0.862594000  | 1.211158000  |
| 1 | -3.765311000 | 2.627804000  | 1.156625000  |
| 1 | -4.750099000 | 1.826426000  | -0.098104000 |
| 6 | 1.137282000  | 2.765234000  | 0.643478000  |
| 1 | 0.281048000  | 2.552415000  | -0.011063000 |
| 1 | 0.746519000  | 3.095114000  | 1.621625000  |
| 1 | 1.707933000  | 3.600972000  | 0.201209000  |
| 6 | 3.122598000  | 1.773567000  | 1.686298000  |
| 1 | 2.785886000  | 2.088717000  | 2.689010000  |
| 1 | 3.695026000  | 0.842879000  | 1.797178000  |
| 1 | 3.799509000  | 2.553547000  | 1.294357000  |
| 1 | 0.160948000  | -1.554020000 | -1.651146000 |

**4Si(PMe<sub>2</sub>)-H<sup>+</sup>, T. E. =-2167.37232**

|    |              |              |              |
|----|--------------|--------------|--------------|
| 6  | 3.772173000  | -1.550040000 | -0.111314000 |
| 7  | 2.775143000  | -1.487674000 | 0.776205000  |
| 14 | 1.927138000  | -0.135443000 | -0.240263000 |
| 7  | 3.531461000  | -0.680907000 | -1.088071000 |
| 14 | -1.648924000 | -0.327679000 | -0.291474000 |
| 7  | -2.195981000 | -1.378691000 | 1.191033000  |
| 6  | -3.107989000 | -1.992509000 | 0.435085000  |
| 7  | -3.064265000 | -1.476562000 | -0.793520000 |
| 6  | 2.545479000  | -2.392078000 | 1.888680000  |
| 1  | 1.668020000  | -3.030524000 | 1.700248000  |
| 1  | 3.420890000  | -3.041814000 | 2.034989000  |
| 1  | 2.380743000  | -1.827333000 | 2.817440000  |
| 6  | 4.431779000  | -0.291597000 | -2.161352000 |
| 1  | 3.875130000  | -0.216953000 | -3.105599000 |
| 1  | 4.901456000  | 0.681381000  | -1.949177000 |
| 1  | 5.224557000  | -1.044391000 | -2.282558000 |
| 6  | -3.760506000 | -1.962757000 | -1.974890000 |
| 1  | -4.486496000 | -2.739394000 | -1.692600000 |
| 1  | -4.301326000 | -1.142199000 | -2.466446000 |
| 1  | -3.049619000 | -2.392573000 | -2.696745000 |
| 6  | -1.978765000 | -1.547471000 | 2.616794000  |
| 1  | -2.619377000 | -2.352008000 | 3.007019000  |
| 1  | -0.930228000 | -1.811801000 | 2.816945000  |
| 1  | -2.211762000 | -0.620848000 | 3.163363000  |
| 1  | -3.777656000 | -2.796806000 | 0.767218000  |
| 1  | 4.645005000  | -2.212804000 | -0.042208000 |
| 14 | 0.176082000  | -0.665250000 | -1.707582000 |

|    |              |              |              |
|----|--------------|--------------|--------------|
| 15 | 2.557487000  | 1.810988000  | 0.803928000  |
| 15 | -2.304321000 | 1.794076000  | 0.208797000  |
| 6  | 1.392412000  | 1.813517000  | 2.283778000  |
| 1  | 0.329240000  | 1.754622000  | 2.010623000  |
| 1  | 1.653667000  | 0.994037000  | 2.967727000  |
| 1  | 1.559376000  | 2.756579000  | 2.825270000  |
| 6  | 1.710344000  | 3.087183000  | -0.288798000 |
| 1  | 2.155331000  | 3.080461000  | -1.293475000 |
| 1  | 0.623870000  | 2.942406000  | -0.364951000 |
| 1  | 1.900862000  | 4.077157000  | 0.151503000  |
| 6  | -2.531313000 | 2.494929000  | -1.523848000 |
| 1  | -3.291347000 | 1.963854000  | -2.112959000 |
| 1  | -2.832922000 | 3.547452000  | -1.423249000 |
| 1  | -1.576264000 | 2.467619000  | -2.065989000 |
| 6  | -4.086476000 | 1.569084000  | 0.759310000  |
| 1  | -4.691226000 | 0.971582000  | 0.063213000  |
| 1  | -4.112526000 | 1.107673000  | 1.755740000  |
| 1  | -4.535374000 | 2.569159000  | 0.848226000  |
| 1  | 0.273008000  | -2.166011000 | -1.414183000 |

**5Si(H)-H<sup>1+</sup>, T. E.= -2548.67142**

|    |              |              |              |
|----|--------------|--------------|--------------|
| 6  | -3.535291000 | -0.632191000 | 0.504105000  |
| 6  | -3.441268000 | 0.719151000  | 0.796781000  |
| 6  | -2.383951000 | 1.419094000  | 0.102475000  |
| 14 | -1.461435000 | 0.261848000  | -0.985968000 |
| 6  | -2.542157000 | -1.121077000 | -0.420910000 |
| 1  | -4.323058000 | -1.254662000 | 0.934085000  |
| 1  | -4.146644000 | 1.206114000  | 1.473875000  |
| 15 | -2.470631000 | -2.707561000 | -1.107306000 |
| 1  | -1.309655000 | -2.821618000 | -1.914400000 |
| 1  | -2.402224000 | -3.812392000 | -0.201327000 |
| 15 | -2.104246000 | 3.125696000  | 0.157090000  |
| 1  | -1.087587000 | 3.485127000  | -0.762033000 |
| 1  | -3.204707000 | 3.978778000  | -0.169325000 |
| 14 | 0.513280000  | 0.498653000  | -2.218244000 |
| 14 | 1.607271000  | -0.202390000 | -0.231030000 |
| 6  | 3.412614000  | -0.044652000 | 0.095668000  |
| 6  | 3.692550000  | -0.273219000 | 1.488323000  |
| 6  | 2.571546000  | -0.482520000 | 2.269797000  |
| 6  | 1.307900000  | -0.435635000 | 1.571638000  |
| 1  | 4.698294000  | -0.286451000 | 1.913612000  |
| 1  | 2.651108000  | -0.667890000 | 3.344023000  |
| 15 | -0.182971000 | -0.757537000 | 2.403043000  |
| 1  | -0.616248000 | -2.114892000 | 2.572212000  |
| 1  | -0.131012000 | -0.330098000 | 3.762848000  |

|    |              |              |              |
|----|--------------|--------------|--------------|
| 15 | 4.588307000  | 0.282622000  | -1.126466000 |
| 1  | 3.944908000  | 0.604589000  | -2.348563000 |
| 1  | 5.480436000  | 1.374750000  | -0.887268000 |
| 1  | -1.334526000 | -0.123031000 | 1.859698000  |
| 1  | 5.521085000  | -0.738726000 | -1.503052000 |
| 1  | -3.534233000 | -3.135812000 | -1.964773000 |
| 1  | -1.670059000 | 3.712563000  | 1.389672000  |
| 1  | 0.287978000  | -0.931909000 | -2.748572000 |

**5Si(Me)-H<sup>1+</sup>, T. E. =-3020.42428**

|    |              |              |              |
|----|--------------|--------------|--------------|
| 6  | 3.667410000  | -1.139638000 | 0.923565000  |
| 6  | 2.648116000  | -1.810574000 | 1.591297000  |
| 6  | 1.374597000  | -1.820751000 | 0.929226000  |
| 14 | 1.524270000  | -0.947601000 | -0.697812000 |
| 6  | 3.293348000  | -0.549632000 | -0.331224000 |
| 1  | 4.687274000  | -1.135487000 | 1.318919000  |
| 1  | 2.846351000  | -2.344283000 | 2.525305000  |
| 15 | 4.474291000  | 0.230093000  | -1.362520000 |
| 15 | -0.003916000 | -2.680999000 | 1.578154000  |
| 14 | 0.192432000  | 0.370620000  | -2.167360000 |
| 14 | -1.478648000 | 0.743969000  | -0.551568000 |
| 6  | -3.261221000 | 0.347593000  | -0.284948000 |
| 6  | -3.701515000 | 1.016330000  | 0.921047000  |
| 6  | -2.736214000 | 1.750538000  | 1.589375000  |
| 6  | -1.435426000 | 1.782314000  | 0.965123000  |
| 1  | -4.727346000 | 0.960202000  | 1.295227000  |
| 1  | -2.969463000 | 2.275456000  | 2.519463000  |
| 15 | -0.085315000 | 2.689274000  | 1.601028000  |
| 15 | -4.416706000 | -0.274324000 | -1.435112000 |
| 6  | 0.491907000  | -4.187863000 | 2.508701000  |
| 1  | 1.074008000  | -4.846263000 | 1.850767000  |
| 1  | 1.112228000  | -3.907091000 | 3.370358000  |
| 1  | -0.400741000 | -4.717929000 | 2.869675000  |
| 6  | -1.126287000 | -3.222240000 | 0.240449000  |
| 1  | -1.462869000 | -2.325369000 | -0.300600000 |
| 1  | -0.583415000 | -3.883250000 | -0.447002000 |
| 1  | -1.994213000 | -3.745423000 | 0.666038000  |
| 6  | -1.047467000 | -1.711321000 | 2.745036000  |
| 1  | -1.431159000 | -0.818899000 | 2.227832000  |
| 1  | -1.887940000 | -2.318576000 | 3.111038000  |
| 1  | -0.427804000 | -1.399274000 | 3.596930000  |
| 6  | 1.127626000  | 1.725935000  | 2.599599000  |
| 1  | 1.955199000  | 2.369766000  | 2.931411000  |
| 1  | 0.612575000  | 1.315653000  | 3.478808000  |
| 1  | 1.520671000  | 0.893877000  | 1.995861000  |

|   |              |              |              |
|---|--------------|--------------|--------------|
| 6 | 0.884533000  | 3.456539000  | 0.249435000  |
| 1 | 1.780991000  | 3.951290000  | 0.649100000  |
| 1 | 1.174984000  | 2.673670000  | -0.468050000 |
| 1 | 0.252657000  | 4.187627000  | -0.271732000 |
| 6 | -0.643972000 | 4.055821000  | 2.693573000  |
| 1 | 0.221744000  | 4.639932000  | 3.035200000  |
| 1 | -1.334587000 | 4.706214000  | 2.141249000  |
| 1 | -1.163513000 | 3.645191000  | 3.569734000  |
| 6 | -5.160036000 | 1.016520000  | -2.523506000 |
| 1 | -4.362668000 | 1.464411000  | -3.131782000 |
| 1 | -5.933147000 | 0.589843000  | -3.179032000 |
| 1 | -5.601416000 | 1.800165000  | -1.892792000 |
| 6 | -3.688195000 | -1.517153000 | -2.564954000 |
| 1 | -2.751225000 | -1.126994000 | -2.987109000 |
| 1 | -3.467804000 | -2.436741000 | -2.007713000 |
| 1 | -4.392518000 | -1.742862000 | -3.377527000 |
| 6 | -5.854366000 | -1.080121000 | -0.616552000 |
| 1 | -6.547987000 | -1.475903000 | -1.371494000 |
| 1 | -5.500144000 | -1.898572000 | 0.023544000  |
| 1 | -6.385451000 | -0.347030000 | 0.005255000  |
| 6 | 3.887270000  | 0.384181000  | -3.085929000 |
| 1 | 4.599125000  | 0.983137000  | -3.671139000 |
| 1 | 3.792262000  | -0.615388000 | -3.529606000 |
| 1 | 2.895974000  | 0.865728000  | -3.089207000 |
| 6 | 4.925207000  | 1.934900000  | -0.819589000 |
| 1 | 5.268643000  | 1.897583000  | 0.223219000  |
| 1 | 5.720610000  | 2.353987000  | -1.452489000 |
| 1 | 4.034230000  | 2.573660000  | -0.879448000 |
| 6 | 6.073384000  | -0.678590000 | -1.416890000 |
| 1 | 6.779366000  | -0.170964000 | -2.089226000 |
| 1 | 6.509149000  | -0.728606000 | -0.409992000 |
| 1 | 5.890065000  | -1.700459000 | -1.774072000 |
| 1 | -0.572934000 | -0.777239000 | -2.840817000 |

**6Ge-H<sup>1+</sup>, T. E.= -6765.68480**

|    |              |              |              |
|----|--------------|--------------|--------------|
| 32 | -0.136590000 | -0.105129000 | -0.080278000 |
| 7  | -0.313480000 | 0.241125000  | 1.800584000  |
| 6  | 0.857499000  | 0.580427000  | 2.384515000  |
| 6  | 1.926942000  | 0.758182000  | 1.510640000  |
| 7  | 1.643612000  | 0.555289000  | 0.203250000  |
| 32 | -1.850703000 | 1.390029000  | -1.350702000 |
| 1  | 0.944015000  | 0.658339000  | 3.469491000  |
| 1  | 2.941398000  | 0.994668000  | 1.835812000  |
| 32 | -0.245553000 | 3.236631000  | -2.142473000 |
| 7  | -0.928299000 | 4.969117000  | -1.669925000 |

|   |              |              |              |
|---|--------------|--------------|--------------|
| 6 | -1.267137000 | 5.708483000  | -2.747503000 |
| 6 | -1.190863000 | 5.046922000  | -3.971949000 |
| 7 | -0.778575000 | 3.762304000  | -3.909749000 |
| 1 | -1.542747000 | 6.759385000  | -2.645499000 |
| 1 | -1.406305000 | 5.522402000  | -4.930116000 |
| 6 | -1.502857000 | -0.042540000 | 2.612255000  |
| 1 | -2.390860000 | -0.067946000 | 1.967277000  |
| 1 | -1.412876000 | -1.012568000 | 3.123988000  |
| 1 | -1.640647000 | 0.746077000  | 3.366179000  |
| 6 | 2.695811000  | 0.644622000  | -0.814330000 |
| 1 | 3.112963000  | 1.662805000  | -0.841982000 |
| 1 | 3.507745000  | -0.068941000 | -0.608197000 |
| 1 | 2.272062000  | 0.415592000  | -1.800192000 |
| 6 | -0.608067000 | 2.968728000  | -5.132607000 |
| 1 | 0.187612000  | 3.387974000  | -5.766699000 |
| 1 | -0.344445000 | 1.937806000  | -4.866153000 |
| 1 | -1.548387000 | 2.949460000  | -5.702923000 |
| 6 | -0.927527000 | 5.556988000  | -0.326109000 |
| 1 | -0.140282000 | 6.319476000  | -0.225448000 |
| 1 | -1.902939000 | 6.020986000  | -0.118833000 |
| 1 | -0.751873000 | 4.770096000  | 0.418300000  |
| 1 | -1.473575000 | 0.625960000  | -2.709161000 |

**7Ge-H<sup>1+</sup>**, T. E.= -8872.18839

|    |              |              |              |
|----|--------------|--------------|--------------|
| 6  | -4.403684000 | 1.192628000  | 0.220708000  |
| 6  | -2.904798000 | 1.643439000  | 0.247647000  |
| 32 | -1.959018000 | -0.061393000 | -0.069419000 |
| 6  | -3.532172000 | -1.217924000 | 0.210243000  |
| 6  | -4.582448000 | -0.227220000 | 0.805802000  |
| 1  | -4.768674000 | 1.200186000  | -0.820854000 |
| 32 | -0.018459000 | -0.830885000 | -1.317027000 |
| 1  | -5.609477000 | -0.579725000 | 0.614464000  |
| 32 | 1.944317000  | -0.100215000 | -0.072181000 |
| 6  | 3.422258000  | -1.317016000 | 0.416925000  |
| 6  | 4.668717000  | -0.378045000 | 0.388336000  |
| 6  | 4.296078000  | 1.064661000  | 0.798524000  |
| 6  | 3.012186000  | 1.556072000  | 0.056938000  |
| 1  | 5.091993000  | -0.365584000 | -0.631889000 |
| 1  | 5.141871000  | 1.740735000  | 0.591525000  |
| 14 | -4.062782000 | -1.912519000 | -1.516687000 |
| 1  | -4.354689000 | -0.790923000 | -2.468541000 |
| 1  | -2.953480000 | -2.749964000 | -2.073961000 |
| 1  | -5.298932000 | -2.734357000 | -1.314184000 |
| 14 | -3.174061000 | -2.702534000 | 1.381313000  |
| 1  | -2.182165000 | -3.627168000 | 0.747706000  |

|    |              |              |              |
|----|--------------|--------------|--------------|
| 1  | -2.627109000 | -2.177318000 | 2.675746000  |
| 1  | -4.462854000 | -3.420856000 | 1.638259000  |
| 14 | -2.493848000 | 2.971710000  | -1.078986000 |
| 1  | -1.008285000 | 3.122306000  | -1.195732000 |
| 1  | -3.065221000 | 2.524481000  | -2.390355000 |
| 1  | -3.104351000 | 4.279918000  | -0.676991000 |
| 14 | -2.396228000 | 2.304107000  | 1.992034000  |
| 1  | -2.323039000 | 1.188399000  | 2.994385000  |
| 1  | -1.050327000 | 2.951336000  | 1.906128000  |
| 1  | -3.438097000 | 3.291168000  | 2.417452000  |
| 14 | 2.205286000  | 3.059649000  | 0.928524000  |
| 1  | 1.947823000  | 2.703207000  | 2.362035000  |
| 1  | 3.152128000  | 4.218842000  | 0.860684000  |
| 1  | 0.922331000  | 3.414690000  | 0.246650000  |
| 14 | 3.369372000  | 2.016939000  | -1.795851000 |
| 1  | 4.606330000  | 2.860561000  | -1.811967000 |
| 1  | 3.598279000  | 0.780754000  | -2.619205000 |
| 1  | 2.191478000  | 2.751035000  | -2.353392000 |
| 14 | 3.009735000  | -1.936879000 | 2.205269000  |
| 1  | 4.278241000  | -2.458439000 | 2.805535000  |
| 1  | 2.487554000  | -0.811168000 | 3.054853000  |
| 1  | 1.961808000  | -3.002211000 | 2.131642000  |
| 14 | 3.614154000  | -2.841109000 | -0.738685000 |
| 1  | 4.022731000  | -2.352123000 | -2.095909000 |
| 1  | 4.677754000  | -3.738230000 | -0.182348000 |
| 1  | 2.318654000  | -3.585456000 | -0.829214000 |
| 1  | 5.465219000  | -0.758772000 | 1.048374000  |
| 1  | 4.127988000  | 1.103713000  | 1.889272000  |
| 1  | -4.474019000 | -0.186700000 | 1.904468000  |
| 1  | -5.032899000 | 1.907187000  | 0.776452000  |
| 1  | -0.037048000 | -2.270420000 | -0.672823000 |

**8Ge-H<sup>1+</sup>, T. E.= -6920.42637**

|    |              |              |              |
|----|--------------|--------------|--------------|
| 6  | -0.093674000 | 0.532032000  | 0.230943000  |
| 7  | 0.210858000  | -0.590172000 | 1.064034000  |
| 32 | 1.601781000  | -0.658377000 | 2.241525000  |
| 7  | 2.467864000  | 0.923852000  | 1.949680000  |
| 6  | 1.939855000  | 1.833757000  | 1.023172000  |
| 6  | 0.824222000  | 1.666564000  | 0.275205000  |
| 32 | 2.460674000  | -2.685291000 | 3.489563000  |
| 1  | 2.516547000  | 2.757638000  | 0.927884000  |
| 1  | 0.565552000  | 2.490390000  | -0.390579000 |
| 32 | 0.522805000  | -2.345359000 | 5.089042000  |
| 7  | 0.142291000  | -1.146942000 | 6.411024000  |
| 6  | -0.990877000 | -1.235282000 | 7.281722000  |

|   |              |              |              |
|---|--------------|--------------|--------------|
| 6 | -1.900952000 | -2.361215000 | 7.091436000  |
| 6 | -1.828618000 | -3.377841000 | 6.200800000  |
| 7 | -0.829015000 | -3.563834000 | 5.235967000  |
| 1 | -2.754107000 | -2.378180000 | 7.770214000  |
| 1 | -2.602594000 | -4.149728000 | 6.200683000  |
| 6 | -1.181679000 | 0.546116000  | -0.580787000 |
| 1 | -1.364631000 | 1.417853000  | -1.206722000 |
| 1 | -1.895485000 | -0.269827000 | -0.655486000 |
| 6 | -0.687221000 | -1.744609000 | 0.985481000  |
| 1 | -1.712090000 | -1.466668000 | 1.280150000  |
| 1 | -0.710860000 | -2.140320000 | -0.042461000 |
| 1 | -0.331040000 | -2.541788000 | 1.653973000  |
| 6 | 3.711402000  | 1.300779000  | 2.636069000  |
| 1 | 3.582391000  | 2.252605000  | 3.174239000  |
| 1 | 3.990030000  | 0.525938000  | 3.362910000  |
| 1 | 4.534985000  | 1.406304000  | 1.912886000  |
| 6 | 1.052541000  | -0.015286000 | 6.610548000  |
| 1 | 1.475493000  | -0.037798000 | 7.627478000  |
| 1 | 1.879216000  | -0.069423000 | 5.888690000  |
| 1 | 0.518176000  | 0.938312000  | 6.472015000  |
| 6 | -0.909549000 | -4.771255000 | 4.402515000  |
| 1 | -0.867739000 | -5.676111000 | 5.028359000  |
| 1 | -1.844525000 | -4.781223000 | 3.820797000  |
| 1 | -0.063218000 | -4.802639000 | 3.702365000  |
| 6 | -1.220639000 | -0.311537000 | 8.249556000  |
| 1 | -2.096022000 | -0.420168000 | 8.887760000  |
| 1 | -0.578144000 | 0.544026000  | 8.438169000  |
| 1 | 3.254184000  | -1.617217000 | 4.384016000  |

**9Ge(H)-H<sup>1+</sup>, T. E.= -6689.43639**

|    |              |              |              |
|----|--------------|--------------|--------------|
| 6  | 3.932968000  | 0.651549000  | -0.266386000 |
| 7  | 3.615461000  | -0.603619000 | 0.032158000  |
| 32 | 1.763816000  | -0.064818000 | 0.538786000  |
| 7  | 2.900563000  | 1.465554000  | -0.058073000 |
| 32 | -1.764013000 | -0.065435000 | 0.539108000  |
| 7  | -3.615634000 | -0.603288000 | 0.031444000  |
| 6  | -3.932629000 | 0.652214000  | -0.266318000 |
| 7  | -2.900016000 | 1.465708000  | -0.057248000 |
| 6  | 4.502438000  | -1.755268000 | 0.052228000  |
| 1  | 4.052063000  | -2.592050000 | -0.500167000 |
| 1  | 5.460683000  | -1.500973000 | -0.425211000 |
| 1  | 4.702196000  | -2.083083000 | 1.084026000  |
| 6  | 2.818144000  | 2.877848000  | -0.386352000 |
| 1  | 2.089913000  | 3.052984000  | -1.193369000 |
| 1  | 2.516113000  | 3.461833000  | 0.495182000  |

|    |              |              |              |
|----|--------------|--------------|--------------|
| 1  | 3.799932000  | 3.244216000  | -0.722200000 |
| 6  | -2.817410000 | 2.878472000  | -0.383268000 |
| 1  | -3.798519000 | 3.244953000  | -0.720978000 |
| 1  | -2.517629000 | 3.461426000  | 0.499739000  |
| 1  | -2.087361000 | 3.054968000  | -1.188336000 |
| 6  | -4.502931000 | -1.754704000 | 0.049684000  |
| 1  | -5.461364000 | -1.499148000 | -0.426702000 |
| 1  | -4.053172000 | -2.590585000 | -0.504596000 |
| 1  | -4.702238000 | -2.084465000 | 1.080942000  |
| 1  | -4.915348000 | 0.976726000  | -0.635159000 |
| 1  | 4.915880000  | 0.975497000  | -0.635202000 |
| 32 | 0.000013000  | -1.196767000 | -0.795160000 |
| 1  | -1.841685000 | 0.002017000  | 2.094909000  |
| 1  | 1.840927000  | 0.003335000  | 2.094591000  |
| 1  | -0.000564000 | -0.034118000 | -1.880440000 |

**9Ge(Me)-H<sup>+</sup>, T. E.= -6768.06066**

|    |              |              |              |
|----|--------------|--------------|--------------|
| 6  | 3.818416000  | 0.692663000  | -0.753839000 |
| 7  | 3.584468000  | -0.569149000 | -0.413037000 |
| 32 | 1.836117000  | -0.071331000 | 0.432978000  |
| 7  | 2.844575000  | 1.493388000  | -0.327097000 |
| 32 | -1.835578000 | -0.068832000 | 0.432804000  |
| 7  | -3.585009000 | -0.571014000 | -0.408511000 |
| 6  | -3.819653000 | 0.689165000  | -0.754803000 |
| 7  | -2.845470000 | 1.492038000  | -0.332844000 |
| 6  | 4.448223000  | -1.713785000 | -0.646725000 |
| 1  | 3.899801000  | -2.506634000 | -1.176157000 |
| 1  | 5.311359000  | -1.419199000 | -1.262902000 |
| 1  | 4.824098000  | -2.125364000 | 0.302717000  |
| 6  | 2.688761000  | 2.904065000  | -0.632336000 |
| 1  | 1.853714000  | 3.069767000  | -1.331439000 |
| 1  | 2.496639000  | 3.477318000  | 0.286323000  |
| 1  | 3.607330000  | 3.296535000  | -1.094887000 |
| 6  | -2.689536000 | 2.901030000  | -0.645745000 |
| 1  | -3.608336000 | 3.291239000  | -1.109736000 |
| 1  | -2.496610000 | 3.479128000  | 0.269703000  |
| 1  | -1.854929000 | 3.062734000  | -1.346304000 |
| 6  | -4.449063000 | -1.716819000 | -0.635203000 |
| 1  | -5.312960000 | -1.425475000 | -1.251860000 |
| 1  | -3.901240000 | -2.512373000 | -1.161184000 |
| 1  | -4.823779000 | -2.123486000 | 0.316816000  |
| 1  | -4.701716000 | 1.026307000  | -1.317609000 |
| 1  | 4.699760000  | 1.032563000  | -1.316117000 |
| 32 | -0.000448000 | -1.239411000 | -0.773840000 |
| 6  | -2.193110000 | -0.038256000 | 2.375686000  |



|   |              |              |              |
|---|--------------|--------------|--------------|
| 1 | -1.491577000 | 0.641161000  | 2.879410000  |
| 1 | -3.220862000 | 0.297754000  | 2.563470000  |
| 1 | -2.054629000 | -1.048332000 | 2.786554000  |
| 6 | 2.196378000  | -0.049488000 | 2.375451000  |
| 1 | 1.493593000  | 0.625100000  | 2.883872000  |
| 1 | 2.061436000  | -1.062149000 | 2.781128000  |
| 1 | 3.223436000  | 0.288462000  | 2.563533000  |
| 1 | 0.000107000  | -0.146964000 | -1.931944000 |

**9Ge(Cl)-H<sup>1+</sup>, T. E.= -7608.85799**

|    |              |              |              |
|----|--------------|--------------|--------------|
| 6  | -3.877206000 | 0.557316000  | -0.700649000 |
| 7  | -2.774164000 | 1.295745000  | -0.776086000 |
| 32 | -1.724407000 | -0.130502000 | 0.144458000  |
| 7  | -3.648495000 | -0.589721000 | -0.065437000 |
| 32 | 1.702859000  | 0.080809000  | -0.184650000 |
| 7  | 3.608642000  | -0.229205000 | -0.669354000 |
| 6  | 3.951041000  | -0.252845000 | 0.616465000  |
| 7  | 2.900283000  | -0.019963000 | 1.397747000  |
| 6  | -2.585586000 | 2.548188000  | -1.490079000 |
| 1  | -1.917282000 | 2.413464000  | -2.353539000 |
| 1  | -3.555845000 | 2.920374000  | -1.851501000 |
| 1  | -2.148260000 | 3.301666000  | -0.820677000 |
| 6  | -4.620701000 | -1.589684000 | 0.346640000  |
| 1  | -4.307490000 | -2.588696000 | 0.012281000  |
| 1  | -4.727539000 | -1.600599000 | 1.441876000  |
| 1  | -5.601364000 | -1.366127000 | -0.099053000 |
| 6  | 2.868692000  | 0.074864000  | 2.848480000  |
| 1  | 3.869835000  | -0.125645000 | 3.258090000  |
| 1  | 2.556525000  | 1.082441000  | 3.159444000  |
| 1  | 2.166307000  | -0.658186000 | 3.270239000  |
| 6  | 4.463810000  | -0.446349000 | -1.825034000 |
| 1  | 5.506696000  | -0.575620000 | -1.499526000 |
| 1  | 4.157867000  | -1.346833000 | -2.377947000 |
| 1  | 4.415074000  | 0.418572000  | -2.502141000 |
| 1  | 4.968177000  | -0.444345000 | 0.985026000  |
| 1  | -4.851578000 | 0.853864000  | -1.112566000 |
| 32 | 0.023306000  | -1.730791000 | -0.728265000 |
| 17 | 1.400478000  | 2.232416000  | -0.501544000 |
| 17 | -1.534243000 | 0.538506000  | 2.220938000  |
| 1  | -0.117550000 | -0.961449000 | -2.132086000 |

**9Ge(NMe<sub>2</sub>)-H<sup>1+</sup>, T. E.= -6957.358339**

|   |              |              |              |
|---|--------------|--------------|--------------|
| 6 | -3.121553000 | -1.623972000 | 1.148610000  |
| 7 | -3.256909000 | -1.491907000 | -0.160511000 |

|    |              |              |              |
|----|--------------|--------------|--------------|
| 32 | -1.869661000 | 0.021091000  | -0.177627000 |
| 7  | -2.316737000 | -0.689408000 | 1.653941000  |
| 32 | 1.830359000  | 0.116247000  | 0.002522000  |
| 7  | 3.653135000  | -0.337128000 | -0.817826000 |
| 6  | 3.819391000  | -1.322334000 | 0.048958000  |
| 7  | 2.845841000  | -1.340701000 | 0.960001000  |
| 6  | -3.983415000 | -2.379826000 | -1.051866000 |
| 1  | -3.292613000 | -2.964533000 | -1.679391000 |
| 1  | -4.605705000 | -3.081537000 | -0.474997000 |
| 1  | -4.641580000 | -1.797485000 | -1.712647000 |
| 6  | -1.943983000 | -0.523713000 | 3.047527000  |
| 1  | -0.881935000 | -0.764144000 | 3.211636000  |
| 1  | -2.116097000 | 0.513893000  | 3.369749000  |
| 1  | -2.548932000 | -1.186139000 | 3.685544000  |
| 6  | 2.605883000  | -2.388370000 | 1.937646000  |
| 1  | 3.494511000  | -3.030749000 | 2.034196000  |
| 1  | 2.394365000  | -1.946710000 | 2.922080000  |
| 1  | 1.752976000  | -3.022658000 | 1.646719000  |
| 6  | 4.542770000  | 0.024068000  | -1.908045000 |
| 1  | 5.395826000  | -0.670283000 | -1.957256000 |
| 1  | 4.011378000  | -0.013204000 | -2.870726000 |
| 1  | 4.932285000  | 1.044075000  | -1.769426000 |
| 1  | 4.650591000  | -2.041563000 | 0.024980000  |
| 1  | -3.607469000 | -2.405668000 | 1.750025000  |
| 32 | 0.073190000  | -0.399563000 | -1.721189000 |
| 7  | 1.983537000  | 1.610375000  | 1.043211000  |
| 7  | -2.717987000 | 1.635395000  | -0.289168000 |
| 6  | -2.324827000 | 2.637215000  | -1.279999000 |
| 1  | -2.129539000 | 3.610680000  | -0.795553000 |
| 1  | -1.410702000 | 2.327388000  | -1.807762000 |
| 1  | -3.116206000 | 2.787575000  | -2.036598000 |
| 6  | 3.176337000  | 1.906943000  | 1.834741000  |
| 1  | 2.891212000  | 2.208209000  | 2.858241000  |
| 1  | 3.820705000  | 1.020977000  | 1.910859000  |
| 1  | 3.765252000  | 2.729799000  | 1.389530000  |
| 6  | 1.043169000  | 2.722821000  | 0.929263000  |
| 1  | 0.713707000  | 3.051718000  | 1.930769000  |
| 1  | 1.493512000  | 3.592609000  | 0.416512000  |
| 1  | 0.147365000  | 2.419761000  | 0.366912000  |
| 6  | -3.949025000 | 1.956877000  | 0.429726000  |
| 1  | -3.846839000 | 2.919751000  | 0.961081000  |
| 1  | -4.807650000 | 2.040758000  | -0.261208000 |
| 1  | -4.178877000 | 1.181117000  | 1.172036000  |
| 1  | 0.111402000  | -1.897078000 | -1.150815000 |

**9Ge(PMe<sub>2</sub>)-H<sup>+</sup>, T. E.=-7530.64522**

|    |              |              |              |
|----|--------------|--------------|--------------|
| 6  | -3.769630000 | -0.793418000 | 1.376066000  |
| 7  | -3.575635000 | -1.286576000 | 0.160406000  |
| 32 | -1.912274000 | -0.184450000 | -0.102687000 |
| 7  | -2.853567000 | 0.124835000  | 1.676515000  |
| 32 | 1.828510000  | -0.172278000 | 0.024520000  |
| 7  | 3.090596000  | -0.215619000 | -1.540942000 |
| 6  | 3.947584000  | -0.982718000 | -0.873653000 |
| 7  | 3.537069000  | -1.193623000 | 0.372991000  |
| 6  | -4.430607000 | -2.213763000 | -0.559515000 |
| 1  | -3.863248000 | -3.107111000 | -0.859716000 |
| 1  | -5.269708000 | -2.532040000 | 0.078121000  |
| 1  | -4.839327000 | -1.742591000 | -1.466411000 |
| 6  | -2.637231000 | 0.716066000  | 2.984159000  |
| 1  | -1.746881000 | 0.289833000  | 3.475019000  |
| 1  | -2.502261000 | 1.803714000  | 2.896483000  |
| 1  | -3.506269000 | 0.531581000  | 3.635103000  |
| 6  | 4.193001000  | -2.016669000 | 1.373957000  |
| 1  | 5.127806000  | -2.434397000 | 0.968946000  |
| 1  | 4.438755000  | -1.426051000 | 2.269283000  |
| 1  | 3.544654000  | -2.852181000 | 1.678101000  |
| 6  | 3.171418000  | 0.143889000  | -2.946238000 |
| 1  | 4.138329000  | -0.175717000 | -3.364548000 |
| 1  | 2.369467000  | -0.340475000 | -3.524943000 |
| 1  | 3.084714000  | 1.232948000  | -3.073496000 |
| 1  | 4.872118000  | -1.396842000 | -1.301719000 |
| 1  | -4.579729000 | -1.104562000 | 2.051534000  |
| 32 | -0.024416000 | -1.857582000 | -0.229771000 |
| 15 | 1.995030000  | 2.070850000  | 0.767914000  |
| 15 | -2.650154000 | 1.353585000  | -1.738743000 |
| 6  | -1.078636000 | 2.317337000  | -2.099059000 |
| 1  | -0.593865000 | 2.754532000  | -1.215193000 |
| 1  | -0.366112000 | 1.661118000  | -2.618568000 |
| 1  | -1.343600000 | 3.127215000  | -2.795177000 |
| 6  | 3.846487000  | 2.363841000  | 0.829638000  |
| 1  | 4.391062000  | 1.608236000  | 1.411967000  |
| 1  | 4.244855000  | 2.394212000  | -0.193047000 |
| 1  | 4.015284000  | 3.351501000  | 1.284479000  |
| 6  | 1.604457000  | 1.834897000  | 2.594263000  |
| 1  | 2.315260000  | 1.181463000  | 3.118213000  |
| 1  | 1.623782000  | 2.826351000  | 3.069752000  |
| 1  | 0.590286000  | 1.428386000  | 2.710319000  |
| 6  | -3.626042000 | 2.594589000  | -0.722508000 |
| 1  | -3.029654000 | 3.097610000  | 0.050144000  |
| 1  | -4.020148000 | 3.352910000  | -1.415323000 |
| 1  | -4.483354000 | 2.093034000  | -0.254193000 |

1 -0.037658000 -1.918676000 1.375871000

**10Ge(H)-H<sup>1+</sup>, T. E.= -7911.94820**

6 4.115728000 1.341099000 0.307065000  
6 3.199489000 2.066637000 1.059110000  
6 1.917778000 1.459728000 1.234721000  
32 1.889251000 -0.334378000 0.499088000  
6 3.653171000 0.082420000 -0.184952000  
1 5.129888000 1.716920000 0.149432000  
1 3.479645000 3.022069000 1.510349000  
15 4.612096000 -1.040110000 -1.085810000  
1 3.824581000 -2.142790000 -1.501528000  
1 5.199612000 -0.550923000 -2.294780000  
15 0.659428000 2.080829000 2.246413000  
1 -0.525568000 1.312760000 2.068811000  
1 0.837463000 2.134438000 3.670261000  
32 0.216569000 -1.708896000 -0.830919000  
32 -1.678244000 -0.192178000 -0.265637000  
6 -3.313336000 -0.519162000 0.698395000  
6 -4.331784000 0.406926000 0.304637000  
6 -3.976664000 1.308096000 -0.688179000  
6 -2.642363000 1.190051000 -1.199129000  
1 -5.323739000 0.438663000 0.761679000  
1 -4.681034000 2.071682000 -1.027780000  
15 -2.004646000 2.114857000 -2.510111000  
1 -2.661084000 1.996679000 -3.777064000  
1 -1.932310000 3.543678000 -2.394796000  
15 -3.489017000 -1.825934000 1.814541000  
1 -2.247481000 -2.497422000 1.959028000  
1 -3.900201000 -1.536404000 3.157436000  
1 -0.665510000 1.743289000 -2.782270000  
1 -4.411576000 -2.869733000 1.483570000  
1 5.751254000 -1.667912000 -0.479416000  
1 0.252850000 3.427806000 1.988399000  
1 -0.209232000 -2.567709000 0.462121000

**10Ge(Me)-H<sup>1+</sup>, T. E.= -8383.70374**

6 -3.786340000 0.885532000 1.124705000  
6 -2.841073000 1.695641000 1.742646000  
6 -1.573456000 1.816206000 1.083709000  
32 -1.567140000 0.743469000 -0.511564000  
6 -3.375801000 0.214808000 -0.077688000  
1 -4.792860000 0.790519000 1.542757000  
1 -3.086236000 2.226543000 2.667284000

|    |              |              |              |
|----|--------------|--------------|--------------|
| 15 | -4.531569000 | -0.486945000 | -1.180948000 |
| 15 | -0.254747000 | 2.776716000  | 1.699837000  |
| 32 | 0.212073000  | 0.252127000  | -2.195189000 |
| 32 | 1.653797000  | -1.135110000 | -0.590257000 |
| 6  | 3.350094000  | -0.360136000 | -0.009207000 |
| 6  | 3.600957000  | -0.679291000 | 1.354835000  |
| 6  | 2.576560000  | -1.354507000 | 2.029850000  |
| 6  | 1.408574000  | -1.650315000 | 1.275385000  |
| 1  | 4.557253000  | -0.495523000 | 1.856519000  |
| 1  | 2.731748000  | -1.694872000 | 3.059447000  |
| 15 | 0.068034000  | -2.569407000 | 1.925951000  |
| 15 | 4.597330000  | 0.300277000  | -1.046170000 |
| 6  | 0.881050000  | 3.266505000  | 0.351620000  |
| 1  | 1.287277000  | 2.357575000  | -0.117054000 |
| 1  | 0.328496000  | 3.844437000  | -0.400025000 |
| 1  | 1.705017000  | 3.869492000  | 0.758283000  |
| 6  | 0.809640000  | 1.943169000  | 2.953499000  |
| 1  | 1.241092000  | 1.035557000  | 2.504988000  |
| 1  | 1.616719000  | 2.611190000  | 3.288269000  |
| 1  | 0.189852000  | 1.663057000  | 3.816373000  |
| 6  | -0.837567000 | 4.325201000  | 2.504508000  |
| 1  | -1.479338000 | 4.077978000  | 3.360983000  |
| 1  | 0.017815000  | 4.917852000  | 2.857949000  |
| 1  | -1.421387000 | 4.909567000  | 1.781442000  |
| 6  | -3.776969000 | -1.775537000 | -2.240806000 |
| 1  | -4.457152000 | -2.035741000 | -3.063512000 |
| 1  | -2.826538000 | -1.402388000 | -2.650623000 |
| 1  | -3.572582000 | -2.670295000 | -1.638527000 |
| 6  | -5.307386000 | 0.723738000  | -2.337257000 |
| 1  | -5.770234000 | 1.527544000  | -1.748670000 |
| 1  | -4.520242000 | 1.159499000  | -2.967231000 |
| 1  | -6.067484000 | 0.243133000  | -2.970701000 |
| 6  | -5.947570000 | -1.275819000 | -0.308887000 |
| 1  | -5.570869000 | -2.038132000 | 0.385332000  |
| 1  | -6.502356000 | -0.517684000 | 0.260026000  |
| 1  | -6.626053000 | -1.742276000 | -1.036746000 |
| 6  | 5.025267000  | 2.047789000  | -0.642338000 |
| 1  | 5.315594000  | 2.110366000  | 0.415261000  |
| 1  | 5.854058000  | 2.405065000  | -1.269990000 |
| 1  | 4.141857000  | 2.678581000  | -0.806341000 |
| 6  | 6.200223000  | -0.604664000 | -0.953274000 |
| 1  | 6.941367000  | -0.155563000 | -1.629858000 |
| 1  | 6.583034000  | -0.571246000 | 0.075812000  |
| 1  | 6.031429000  | -1.653503000 | -1.230853000 |
| 6  | 4.087414000  | 0.286940000  | -2.801874000 |
| 1  | 3.108359000  | 0.779195000  | -2.904200000 |

|   |              |              |              |
|---|--------------|--------------|--------------|
| 1 | 4.834743000  | 0.815326000  | -3.410013000 |
| 1 | 3.998363000  | -0.750628000 | -3.148999000 |
| 6 | 0.601815000  | -3.995675000 | 2.962504000  |
| 1 | 1.226523000  | -4.666311000 | 2.357951000  |
| 1 | 1.194619000  | -3.633575000 | 3.813681000  |
| 1 | -0.272665000 | -4.542704000 | 3.342870000  |
| 6 | -1.071439000 | -1.594957000 | 2.994777000  |
| 1 | -1.871810000 | -2.237407000 | 3.389407000  |
| 1 | -0.498873000 | -1.175685000 | 3.833473000  |
| 1 | -1.509171000 | -0.773294000 | 2.408131000  |
| 6 | -0.965559000 | -3.246074000 | 0.579120000  |
| 1 | -0.354748000 | -3.886518000 | -0.069798000 |
| 1 | -1.796497000 | -3.824992000 | 1.005998000  |
| 1 | -1.363169000 | -2.402784000 | -0.005266000 |
| 1 | -0.640639000 | -1.007840000 | -2.704517000 |

**1Si-H<sub>2</sub><sup>12+</sup>, T. E.= -1402.66465**

|           |                     |                     |                     |
|-----------|---------------------|---------------------|---------------------|
| <b>14</b> | <b>-0.000063000</b> | <b>-0.000392000</b> | <b>-0.895439000</b> |
| 14        | 1.946698000         | 0.380947000         | 0.458831000         |
| 14        | -1.946854000        | -0.381430000        | 0.458882000         |
| 7         | 3.283073000         | 0.952085000         | -0.608455000        |
| 7         | 2.889226000         | -1.129271000        | 0.736502000         |
| 7         | -2.888639000        | 1.129197000         | 0.736859000         |
| 7         | -3.283590000        | -0.951745000        | -0.608417000        |
| 6         | 4.362488000         | 0.149360000         | -0.501486000        |
| 1         | 5.325593000         | 0.433573000         | -0.927893000        |
| 6         | 4.142835000         | -1.012225000        | 0.250536000         |
| 1         | 4.913807000         | -1.747144000        | 0.486584000         |
| 6         | -4.362603000        | -0.148513000        | -0.501233000        |
| 1         | -5.325879000        | -0.432204000        | -0.927603000        |
| 6         | -4.142331000        | 1.012852000         | 0.250952000         |
| 1         | -4.912913000        | 1.748141000         | 0.487127000         |
| 6         | 3.367849000         | 2.245600000         | -1.319536000        |
| 6         | 2.515025000         | -2.270015000        | 1.598430000         |
| 6         | -3.369142000        | -2.245268000        | -1.319393000        |
| 6         | -2.513755000        | 2.269712000         | 1.598786000         |
| 1         | 3.082970000         | -2.244800000        | 2.538775000         |
| 1         | -3.082248000        | 2.245248000         | 2.538818000         |
| 1         | -2.375054000        | -2.704246000        | -1.371566000        |
| 1         | 4.048675000         | 2.928378000         | -0.792561000        |
| 1         | 1.444844000         | -2.220366000        | 1.831987000         |
| 1         | 2.725317000         | -3.209777000        | 1.070163000         |
| 1         | -1.443760000        | 2.219003000         | 1.832965000         |
| 1         | -2.722788000        | 3.209597000         | 1.070231000         |
| 1         | 3.737032000         | 2.076003000         | -2.339947000        |

|   |              |              |              |
|---|--------------|--------------|--------------|
| 1 | 2.373971000  | 2.705290000  | -1.369331000 |
| 1 | -4.048275000 | -2.928553000 | -0.790883000 |
| 1 | -3.740833000 | -2.075858000 | -2.338916000 |
| 1 | 0.153428000  | -1.239583000 | -1.723665000 |
| 1 | -0.153501000 | 1.238665000  | -1.723873000 |

**2Si- H<sub>2</sub><sup>12+</sup>, T. E.= -3509.16654**

|    |              |              |              |
|----|--------------|--------------|--------------|
| 6  | -3.922851000 | 1.184466000  | 0.721737000  |
| 6  | -2.408438000 | 1.619093000  | 0.581779000  |
| 14 | -1.690144000 | 0.095434000  | -0.229501000 |
| 6  | -3.144464000 | -1.068401000 | -0.221257000 |
| 6  | -4.055363000 | -0.351294000 | 0.840566000  |
| 1  | -4.484768000 | 1.529478000  | -0.164163000 |
| 14 | 0.054355000  | 0.076448000  | -1.871156000 |
| 1  | -5.107659000 | -0.648140000 | 0.708089000  |
| 14 | 2.072519000  | -0.231026000 | -0.649954000 |
| 6  | 2.200806000  | -1.457006000 | 0.777672000  |
| 6  | 3.534054000  | -1.001562000 | 1.491624000  |
| 6  | 3.783921000  | 0.514887000  | 1.319548000  |
| 6  | 3.447804000  | 0.991282000  | -0.134354000 |
| 1  | 4.374369000  | -1.566198000 | 1.051130000  |
| 1  | 4.824469000  | 0.756915000  | 1.585824000  |
| 14 | -3.843623000 | -0.886717000 | -2.043203000 |
| 1  | -3.322812000 | 0.393696000  | -2.646359000 |
| 1  | -3.332441000 | -2.028523000 | -2.859756000 |
| 1  | -5.332210000 | -0.837761000 | -1.944680000 |
| 14 | -2.873721000 | -2.944305000 | 0.112082000  |
| 1  | -1.703792000 | -3.402928000 | -0.705737000 |
| 1  | -2.572826000 | -3.109655000 | 1.570658000  |
| 1  | -4.107006000 | -3.695135000 | -0.269801000 |
| 14 | -2.214948000 | 3.210188000  | -0.513383000 |
| 1  | -0.760613000 | 3.567935000  | -0.573673000 |
| 1  | -2.722758000 | 2.905399000  | -1.888707000 |
| 1  | -3.011048000 | 4.300473000  | 0.124142000  |
| 14 | -1.637633000 | 2.017035000  | 2.308802000  |
| 1  | -1.900770000 | 0.870469000  | 3.237956000  |
| 1  | -0.154192000 | 2.174723000  | 2.140271000  |
| 1  | -2.249776000 | 3.278298000  | 2.821979000  |
| 14 | 3.217712000  | 2.897749000  | -0.324215000 |
| 1  | 2.145561000  | 3.298150000  | 0.639928000  |
| 1  | 4.514225000  | 3.567570000  | -0.010832000 |
| 1  | 2.792450000  | 3.166395000  | -1.733600000 |
| 14 | 4.412524000  | 0.176117000  | -1.546065000 |
| 1  | 5.475022000  | -0.829937000 | -1.270039000 |
| 1  | 3.112540000  | -0.862893000 | -1.888864000 |

|    |              |              |              |
|----|--------------|--------------|--------------|
| 1  | 4.461943000  | 0.901549000  | -2.843913000 |
| 14 | 0.679374000  | -1.276399000 | 1.924432000  |
| 1  | 0.900315000  | -0.313845000 | 3.041269000  |
| 1  | -0.510934000 | -0.632863000 | 1.080649000  |
| 1  | 0.101464000  | -2.581526000 | 2.356116000  |
| 14 | 2.286945000  | -3.320366000 | 0.211792000  |
| 1  | 3.442929000  | -3.432615000 | -0.732042000 |
| 1  | 2.482364000  | -4.158857000 | 1.431393000  |
| 1  | 0.998910000  | -3.651492000 | -0.474616000 |
| 1  | 3.532938000  | -1.267062000 | 2.560893000  |
| 1  | 3.146035000  | 1.078730000  | 2.021034000  |
| 1  | -3.761697000 | -0.675282000 | 1.853197000  |
| 1  | -4.392397000 | 1.674547000  | 1.589574000  |
| 1  | -0.105424000 | -1.118912000 | -2.756963000 |
| 1  | 0.127746000  | 1.362274000  | -2.629058000 |

**3Si-H<sub>2</sub><sup>12+</sup>, T. E.= -1557.41086**

|    |              |              |              |
|----|--------------|--------------|--------------|
| 6  | 3.795582000  | -0.931117000 | -1.228458000 |
| 7  | 2.561431000  | -1.143145000 | -0.487644000 |
| 14 | 1.982987000  | 0.005889000  | 0.621783000  |
| 7  | 3.007331000  | 1.361329000  | 0.692358000  |
| 6  | 4.168943000  | 1.328692000  | -0.131500000 |
| 6  | 4.499956000  | 0.323823000  | -0.972077000 |
| 14 | -0.015908000 | -0.212394000 | 1.879426000  |
| 1  | 4.805543000  | 2.209768000  | -0.034323000 |
| 1  | 5.423262000  | 0.456584000  | -1.537780000 |
| 14 | -1.995253000 | -0.138050000 | 0.572132000  |
| 7  | -2.461269000 | 1.162011000  | -0.417510000 |
| 6  | -3.709016000 | 1.140786000  | -1.165339000 |
| 6  | -4.523353000 | -0.065836000 | -1.034881000 |
| 6  | -4.288321000 | -1.175065000 | -0.299870000 |
| 7  | -3.141281000 | -1.392716000 | 0.515925000  |
| 1  | -5.451636000 | -0.058519000 | -1.607979000 |
| 1  | -5.000948000 | -2.001512000 | -0.289988000 |
| 6  | 4.261863000  | -1.847322000 | -2.102753000 |
| 1  | 5.191759000  | -1.646284000 | -2.632994000 |
| 1  | 3.774101000  | -2.794087000 | -2.321267000 |
| 6  | 1.854566000  | -2.416512000 | -0.707783000 |
| 1  | 1.553273000  | -2.504772000 | -1.762030000 |
| 1  | 2.507707000  | -3.260923000 | -0.442792000 |
| 1  | 0.955104000  | -2.464425000 | -0.076512000 |
| 6  | 2.854669000  | 2.536751000  | 1.577612000  |
| 1  | 2.816535000  | 3.453426000  | 0.972271000  |
| 1  | 1.929076000  | 2.459643000  | 2.161884000  |
| 1  | 3.703329000  | 2.591952000  | 2.273941000  |



|   |              |              |              |
|---|--------------|--------------|--------------|
| 6 | -1.635657000 | 2.376449000  | -0.521418000 |
| 1 | -2.196202000 | 3.248888000  | -0.154688000 |
| 1 | -0.726302000 | 2.266756000  | 0.088084000  |
| 1 | -1.341081000 | 2.544413000  | -1.567841000 |
| 6 | -3.098695000 | -2.660866000 | 1.276928000  |
| 1 | -3.958562000 | -2.714119000 | 1.959473000  |
| 1 | -3.127573000 | -3.511297000 | 0.581271000  |
| 1 | -2.178563000 | -2.720388000 | 1.871380000  |
| 6 | -4.089222000 | 2.181574000  | -1.935760000 |
| 1 | -5.032120000 | 2.121261000  | -2.477694000 |
| 1 | -3.517420000 | 3.098351000  | -2.056464000 |
| 1 | -0.049456000 | 0.936966000  | 2.831902000  |
| 1 | 0.003232000  | -1.548416000 | 2.545278000  |

**4Si(H)-H<sub>2</sub><sup>12+</sup>, T. E.= -1326.43410**

|    |              |              |              |
|----|--------------|--------------|--------------|
| 6  | 4.015291000  | 0.249040000  | -0.355228000 |
| 7  | 3.517355000  | -0.950531000 | -0.025193000 |
| 14 | 2.025044000  | -0.118461000 | 0.644840000  |
| 7  | 3.118369000  | 1.192554000  | -0.030085000 |
| 14 | -2.025047000 | -0.118484000 | 0.644843000  |
| 7  | -3.517360000 | -0.950526000 | -0.025222000 |
| 6  | -4.015281000 | 0.249056000  | -0.355239000 |
| 7  | -3.118364000 | 1.192557000  | -0.030043000 |
| 6  | 4.162701000  | -2.260425000 | -0.151513000 |
| 1  | 3.539865000  | -2.936245000 | -0.752374000 |
| 1  | 5.132993000  | -2.139265000 | -0.651395000 |
| 1  | 4.327913000  | -2.701516000 | 0.840834000  |
| 6  | 3.263690000  | 2.645014000  | -0.153781000 |
| 1  | 2.458220000  | 3.059213000  | -0.774860000 |
| 1  | 3.243124000  | 3.118231000  | 0.837451000  |
| 1  | 4.225569000  | 2.873619000  | -0.631925000 |
| 6  | -3.263677000 | 2.645022000  | -0.153698000 |
| 1  | -4.225563000 | 2.873646000  | -0.631821000 |
| 1  | -3.243094000 | 3.118213000  | 0.837546000  |
| 1  | -2.458215000 | 3.059231000  | -0.774779000 |
| 6  | -4.162716000 | -2.260412000 | -0.151579000 |
| 1  | -5.133021000 | -2.139226000 | -0.651429000 |
| 1  | -3.539900000 | -2.936210000 | -0.752484000 |
| 1  | -4.327905000 | -2.701543000 | 0.840754000  |
| 1  | -4.997878000 | 0.430999000  | -0.807940000 |
| 1  | 4.997894000  | 0.430965000  | -0.807923000 |
| 14 | 0.000000000  | -0.625569000 | -0.517998000 |
| 1  | -1.988408000 | -0.118136000 | 2.135855000  |
| 1  | 1.988399000  | -0.118064000 | 2.135853000  |
| 1  | -0.000003000 | 0.030966000  | -1.861208000 |

1 0.000008000 -2.121836000 -0.633707000

**4Si(Me)-H<sub>2</sub><sup>12+</sup>, T. E.= -1483.71288**

6 4.015291000 0.249040000 -0.355228000  
7 3.517355000 -0.950531000 -0.025193000  
14 2.025044000 -0.118461000 0.644840000  
7 3.118369000 1.192554000 -0.030085000  
14 -2.025047000 -0.118484000 0.644843000  
7 -3.517360000 -0.950526000 -0.025222000  
6 -4.015281000 0.249056000 -0.355239000  
7 -3.118364000 1.192557000 -0.030043000  
6 4.162701000 -2.260425000 -0.151513000  
1 3.539865000 -2.936245000 -0.752374000  
1 5.132993000 -2.139265000 -0.651395000  
1 4.327913000 -2.701516000 0.840834000  
6 3.263690000 2.645014000 -0.153781000  
1 2.458220000 3.059213000 -0.774860000  
1 3.243124000 3.118231000 0.837451000  
1 4.225569000 2.873619000 -0.631925000  
6 -3.263677000 2.645022000 -0.153698000  
1 -4.225563000 2.873646000 -0.631821000  
1 -3.243094000 3.118213000 0.837546000  
1 -2.458215000 3.059231000 -0.774779000  
6 -4.162716000 -2.260412000 -0.151579000  
1 -5.133021000 -2.139226000 -0.651429000  
1 -3.539900000 -2.936210000 -0.752484000  
1 -4.327905000 -2.701543000 0.840754000  
1 -4.997878000 0.430999000 -0.807940000  
1 4.997894000 0.430965000 -0.807923000  
14 0.000000000 -0.625569000 -0.517998000  
1 -1.988408000 -0.118136000 2.135855000  
1 1.988399000 -0.118064000 2.135853000  
1 -0.000003000 0.030966000 -1.861208000  
1 0.000008000 -2.121836000 -0.633707000

**4Si(Cl)-H<sub>2</sub><sup>12+</sup>, T. E.= -2245.85654**

6 -3.974363000 0.456374000 -0.909808000  
7 -3.090545000 1.314667000 -0.377744000  
14 -2.035335000 -0.110514000 0.092711000  
7 -3.526935000 -0.793740000 -0.729375000  
14 2.036288000 -0.117567000 0.091964000  
7 3.082228000 1.321781000 -0.355322000  
6 3.969101000 0.478341000 -0.905806000  
7 3.528975000 -0.777286000 -0.747349000

|    |              |              |              |
|----|--------------|--------------|--------------|
| 6  | -3.191261000 | 2.772991000  | -0.285158000 |
| 1  | -2.380367000 | 3.253951000  | -0.848627000 |
| 1  | -4.151919000 | 3.098142000  | -0.706138000 |
| 1  | -3.144548000 | 3.085871000  | 0.766657000  |
| 6  | -4.171073000 | -2.054825000 | -1.107458000 |
| 1  | -3.547648000 | -2.606354000 | -1.823810000 |
| 1  | -4.335622000 | -2.672422000 | -0.214386000 |
| 1  | -5.141327000 | -1.840808000 | -1.574903000 |
| 6  | 4.179124000  | -2.027765000 | -1.149592000 |
| 1  | 5.146907000  | -1.800107000 | -1.615738000 |
| 1  | 4.349540000  | -2.660225000 | -0.268098000 |
| 1  | 3.556757000  | -2.569920000 | -1.873968000 |
| 6  | 3.174549000  | 2.778811000  | -0.237246000 |
| 1  | 4.134504000  | 3.116579000  | -0.649822000 |
| 1  | 2.362451000  | 3.265175000  | -0.794345000 |
| 1  | 3.123411000  | 3.072979000  | 0.819735000  |
| 1  | 4.902485000  | 0.770197000  | -1.403042000 |
| 1  | -4.910817000 | 0.733846000  | -1.409513000 |
| 14 | -0.000243000 | -0.492100000 | -1.098332000 |
| 17 | 1.953285000  | -0.504885000 | 2.089472000  |
| 17 | -1.944154000 | -0.459620000 | 2.096946000  |
| 1  | 0.000645000  | 0.314614000  | -2.358432000 |
| 1  | -0.002142000 | -1.963910000 | -1.384540000 |

**4Si(NMe<sub>2</sub>)-H<sub>2</sub><sup>12+</sup>, T. E.= -1594.40608**

|    |              |              |              |
|----|--------------|--------------|--------------|
| 6  | -3.241498000 | -1.702586000 | 0.774510000  |
| 7  | -3.267313000 | -1.437382000 | -0.530606000 |
| 14 | -2.098401000 | 0.004838000  | -0.244850000 |
| 7  | -2.503841000 | -0.765410000 | 1.390462000  |
| 14 | 2.073592000  | 0.084315000  | -0.034312000 |
| 7  | 3.474744000  | -0.250297000 | -1.234302000 |
| 6  | 3.821436000  | -1.319569000 | -0.517128000 |
| 7  | 3.042344000  | -1.376943000 | 0.573217000  |
| 6  | -3.893649000 | -2.224098000 | -1.593100000 |
| 1  | -3.135515000 | -2.737094000 | -2.201983000 |
| 1  | -4.562080000 | -2.977016000 | -1.153935000 |
| 1  | -4.485214000 | -1.564777000 | -2.241586000 |
| 6  | -2.275671000 | -0.613959000 | 2.826567000  |
| 1  | -1.200936000 | -0.634974000 | 3.052897000  |
| 1  | -2.695485000 | 0.336732000  | 3.184074000  |
| 1  | -2.761225000 | -1.436719000 | 3.368637000  |
| 6  | 3.022372000  | -2.422704000 | 1.595541000  |
| 1  | 3.979390000  | -2.961961000 | 1.593971000  |
| 1  | 2.885961000  | -1.966001000 | 2.584196000  |
| 1  | 2.211916000  | -3.144441000 | 1.416053000  |

|    |              |              |              |
|----|--------------|--------------|--------------|
| 6  | 4.075206000  | 0.230432000  | -2.478176000 |
| 1  | 4.899101000  | -0.432477000 | -2.775350000 |
| 1  | 3.329873000  | 0.246004000  | -3.285316000 |
| 1  | 4.471042000  | 1.245744000  | -2.338699000 |
| 1  | 4.608473000  | -2.038344000 | -0.776135000 |
| 1  | -3.734056000 | -2.549173000 | 1.268467000  |
| 14 | 0.046102000  | -0.505055000 | -1.135534000 |
| 7  | -2.676430000 | 1.586253000  | -0.483754000 |
| 7  | 2.136220000  | 1.458792000  | 0.965004000  |
| 6  | -2.046894000 | 2.593627000  | -1.354569000 |
| 1  | -1.888766000 | 3.529519000  | -0.795751000 |
| 1  | -1.075227000 | 2.243085000  | -1.728931000 |
| 1  | -2.687680000 | 2.810600000  | -2.223885000 |
| 6  | -3.996113000 | 2.003702000  | 0.036140000  |
| 1  | -4.428977000 | 1.228301000  | 0.682744000  |
| 1  | -3.890500000 | 2.926372000  | 0.627704000  |
| 1  | -4.694813000 | 2.194813000  | -0.793478000 |
| 6  | 1.066257000  | 2.458476000  | 1.090416000  |
| 1  | 0.153429000  | 2.118181000  | 0.580544000  |
| 1  | 0.827910000  | 2.623424000  | 2.153083000  |
| 1  | 1.371650000  | 3.420200000  | 0.647766000  |
| 6  | 3.378103000  | 1.828566000  | 1.677049000  |
| 1  | 3.167578000  | 1.964951000  | 2.749219000  |
| 1  | 4.137664000  | 1.041858000  | 1.574759000  |
| 1  | 3.790489000  | 2.767697000  | 1.275839000  |
| 1  | 0.096426000  | -2.001074000 | -1.225565000 |
| 1  | 0.114109000  | 0.072789000  | -2.517259000 |

**4Si(PMe<sub>2</sub>)-H<sub>2</sub><sup>12+</sup>, T. E.= -2167.65867**

|    |              |              |              |
|----|--------------|--------------|--------------|
| 6  | 3.839988000  | -1.710840000 | -0.212225000 |
| 7  | 2.978952000  | -1.549166000 | 0.800749000  |
| 14 | 2.183679000  | -0.141579000 | -0.114189000 |
| 7  | 3.528026000  | -0.847443000 | -1.184209000 |
| 14 | -2.008262000 | -0.307935000 | -0.210597000 |
| 7  | -2.510179000 | -1.361675000 | 1.230593000  |
| 6  | -3.357907000 | -2.040432000 | 0.443489000  |
| 7  | -3.278856000 | -1.550143000 | -0.795701000 |
| 6  | 3.005793000  | -2.231927000 | 2.092032000  |
| 1  | 2.034733000  | -2.702758000 | 2.296771000  |
| 1  | 3.774173000  | -3.017013000 | 2.076724000  |
| 1  | 3.245768000  | -1.527096000 | 2.900570000  |
| 6  | 4.234832000  | -0.640296000 | -2.447623000 |
| 1  | 3.522947000  | -0.637255000 | -3.283546000 |
| 1  | 4.781939000  | 0.312936000  | -2.434882000 |
| 1  | 4.953197000  | -1.456422000 | -2.605148000 |

|    |              |              |              |
|----|--------------|--------------|--------------|
| 6  | -3.990099000 | -2.014076000 | -1.986028000 |
| 1  | -4.707493000 | -2.797473000 | -1.705441000 |
| 1  | -4.541271000 | -1.183761000 | -2.447217000 |
| 1  | -3.286786000 | -2.428683000 | -2.721674000 |
| 6  | -2.337060000 | -1.507090000 | 2.673919000  |
| 1  | -3.025201000 | -2.275134000 | 3.052908000  |
| 1  | -1.309126000 | -1.812807000 | 2.913045000  |
| 1  | -2.555125000 | -0.559985000 | 3.186685000  |
| 1  | -4.011295000 | -2.859850000 | 0.768572000  |
| 1  | 4.667948000  | -2.430667000 | -0.236881000 |
| 14 | 0.122718000  | -0.854656000 | -1.134081000 |
| 15 | 2.856462000  | 1.843545000  | 0.776646000  |
| 15 | -2.441975000 | 1.871120000  | 0.158987000  |
| 6  | 1.548035000  | 2.099280000  | 2.102760000  |
| 1  | 0.512787000  | 2.086206000  | 1.734180000  |
| 1  | 1.674687000  | 1.363711000  | 2.909011000  |
| 1  | 1.746572000  | 3.089926000  | 2.539433000  |
| 6  | 2.279995000  | 3.041508000  | -0.552237000 |
| 1  | 2.859777000  | 2.900239000  | -1.474375000 |
| 1  | 1.205497000  | 2.993877000  | -0.772614000 |
| 1  | 2.511603000  | 4.049724000  | -0.176876000 |
| 6  | -2.416014000 | 2.599551000  | -1.572885000 |
| 1  | -3.187458000 | 2.186389000  | -2.234567000 |
| 1  | -2.589882000 | 3.679610000  | -1.461934000 |
| 1  | -1.427480000 | 2.470303000  | -2.033846000 |
| 6  | -4.260448000 | 1.901767000  | 0.604784000  |
| 1  | -4.913526000 | 1.484824000  | -0.172371000 |
| 1  | -4.425211000 | 1.378303000  | 1.555627000  |
| 1  | -4.527562000 | 2.957621000  | 0.760334000  |
| 1  | 0.186276000  | -2.345859000 | -1.288916000 |
| 1  | 0.130021000  | -0.206184000 | -2.489889000 |

**5Si(H)-H<sub>2</sub><sup>12+</sup>, T. E.= -2548.97613**

|    |             |              |              |
|----|-------------|--------------|--------------|
| 6  | 3.485546000 | 0.785772000  | 0.908467000  |
| 6  | 3.667201000 | -0.575101000 | 0.649860000  |
| 6  | 2.806103000 | -1.130877000 | -0.345126000 |
| 14 | 1.832852000 | 0.232000000  | -1.120503000 |
| 6  | 2.460872000 | 1.425359000  | 0.142598000  |
| 1  | 4.144745000 | 1.314226000  | 1.601677000  |
| 1  | 4.469326000 | -1.132697000 | 1.139667000  |
| 15 | 2.282664000 | 3.171358000  | 0.110475000  |
| 1  | 1.172163000 | 3.560360000  | -0.676702000 |
| 1  | 2.063776000 | 3.772289000  | 1.382698000  |
| 15 | 3.052454000 | -2.741866000 | -0.998104000 |
| 1  | 2.059179000 | -3.062132000 | -1.954565000 |

|    |              |              |              |
|----|--------------|--------------|--------------|
| 1  | 4.287955000  | -2.986219000 | -1.667932000 |
| 14 | -0.400863000 | -0.002567000 | -1.826599000 |
| 14 | -1.867802000 | 0.476724000  | -0.033828000 |
| 6  | -3.636534000 | -0.107186000 | -0.119301000 |
| 6  | -3.975480000 | -0.752079000 | 1.091659000  |
| 6  | -2.906248000 | -0.968264000 | 1.980624000  |
| 6  | -1.647733000 | -0.512695000 | 1.528167000  |
| 1  | -4.995268000 | -1.023106000 | 1.377791000  |
| 1  | -3.085764000 | -1.403836000 | 2.966874000  |
| 15 | -0.206937000 | -0.569594000 | 2.529781000  |
| 1  | -0.223129000 | 0.173929000  | 3.748702000  |
| 1  | 0.142200000  | -1.877163000 | 2.971407000  |
| 15 | -4.854522000 | 0.324654000  | -1.312094000 |
| 1  | -4.271403000 | 0.989323000  | -2.417589000 |
| 1  | -5.550016000 | -0.784957000 | -1.869504000 |
| 1  | 0.922279000  | -0.081187000 | 1.820095000  |
| 1  | -5.905105000 | 1.191645000  | -0.888616000 |
| 1  | 3.373924000  | 3.926417000  | -0.414058000 |
| 1  | 2.998000000  | -3.792420000 | -0.038162000 |
| 1  | -0.648271000 | 0.970307000  | -2.939839000 |
| 1  | -0.480447000 | -1.398849000 | -2.381473000 |

**5Si(Me)-H<sub>2</sub><sup>12+</sup>, T. E.= -3020.76803**

|    |              |              |              |
|----|--------------|--------------|--------------|
| 6  | -3.790419000 | 0.598002000  | 0.842158000  |
| 6  | -2.906274000 | 1.457614000  | 1.517032000  |
| 6  | -1.684857000 | 1.738206000  | 0.851287000  |
| 14 | -1.768663000 | 0.983967000  | -0.839604000 |
| 6  | -3.353659000 | 0.109587000  | -0.418769000 |
| 1  | -4.785856000 | 0.405932000  | 1.254209000  |
| 1  | -3.209130000 | 1.927072000  | 2.457981000  |
| 15 | -4.517917000 | -0.686548000 | -1.498036000 |
| 15 | -0.569436000 | 2.973318000  | 1.450622000  |
| 14 | 0.051104000  | -0.114184000 | -1.878985000 |
| 14 | 1.814843000  | -1.118338000 | -0.658332000 |
| 6  | 3.407020000  | -0.211990000 | -0.324296000 |
| 6  | 3.790830000  | -0.496353000 | 1.011454000  |
| 6  | 2.857824000  | -1.207389000 | 1.788708000  |
| 6  | 1.656555000  | -1.573565000 | 1.134263000  |
| 1  | 4.781364000  | -0.273095000 | 1.419392000  |
| 1  | 3.116336000  | -1.518839000 | 2.805003000  |
| 15 | 0.435886000  | -2.582916000 | 1.922129000  |
| 15 | 4.633209000  | 0.325788000  | -1.492719000 |
| 6  | -1.338663000 | 4.636485000  | 1.552825000  |
| 1  | -1.680161000 | 4.936027000  | 0.552920000  |
| 1  | -2.205686000 | 4.598749000  | 2.226242000  |

|   |              |              |              |
|---|--------------|--------------|--------------|
| 1 | -0.615690000 | 5.371866000  | 1.934039000  |
| 6 | 0.885668000  | 3.109802000  | 0.354045000  |
| 1 | 1.414897000  | 2.145876000  | 0.320674000  |
| 1 | 0.558589000  | 3.389694000  | -0.656619000 |
| 1 | 1.560683000  | 3.885738000  | 0.740979000  |
| 6 | 0.053718000  | 2.580179000  | 3.130058000  |
| 1 | 0.635084000  | 1.649867000  | 3.086145000  |
| 1 | 0.691064000  | 3.395390000  | 3.500295000  |
| 1 | -0.793525000 | 2.447578000  | 3.816384000  |
| 6 | -0.684761000 | -1.616202000 | 3.006640000  |
| 1 | -1.440059000 | -2.273447000 | 3.460692000  |
| 1 | -0.094204000 | -1.145588000 | 3.804611000  |
| 1 | -1.178378000 | -0.835977000 | 2.409304000  |
| 6 | -0.616119000 | -3.399248000 | 0.670074000  |
| 1 | -1.360581000 | -4.033913000 | 1.170506000  |
| 1 | -1.133186000 | -2.629451000 | 0.079733000  |
| 1 | 0.006961000  | -4.015116000 | 0.008676000  |
| 6 | 1.182099000  | -3.894790000 | 2.962265000  |
| 1 | 0.393059000  | -4.511109000 | 3.415688000  |
| 1 | 1.832374000  | -4.525468000 | 2.341657000  |
| 1 | 1.782727000  | -3.440976000 | 3.761869000  |
| 6 | 5.917122000  | -0.951358000 | -1.790045000 |
| 1 | 5.438535000  | -1.854124000 | -2.192773000 |
| 1 | 6.669902000  | -0.582421000 | -2.501455000 |
| 1 | 6.406786000  | -1.203052000 | -0.839577000 |
| 6 | 3.895503000  | 0.726857000  | -3.115041000 |
| 1 | 3.395097000  | -0.160138000 | -3.525907000 |
| 1 | 3.165714000  | 1.539133000  | -3.007226000 |
| 1 | 4.689476000  | 1.041302000  | -3.806606000 |
| 6 | 5.514528000  | 1.820572000  | -0.900429000 |
| 1 | 6.285005000  | 2.112962000  | -1.627478000 |
| 1 | 4.800473000  | 2.644354000  | -0.772279000 |
| 1 | 5.996057000  | 1.610030000  | 0.063965000  |
| 6 | -3.747595000 | -1.196026000 | -3.073803000 |
| 1 | -4.506696000 | -1.673054000 | -3.709088000 |
| 1 | -3.349020000 | -0.314971000 | -3.594055000 |
| 1 | -2.933672000 | -1.907794000 | -2.886569000 |
| 6 | -5.237763000 | -2.185317000 | -0.723206000 |
| 1 | -5.711884000 | -1.915284000 | 0.230071000  |
| 1 | -5.993948000 | -2.628504000 | -1.386337000 |
| 1 | -4.443445000 | -2.918721000 | -0.533273000 |
| 6 | -5.929648000 | 0.405844000  | -1.923505000 |
| 1 | -6.629336000 | -0.116564000 | -2.591429000 |
| 1 | -6.455877000 | 0.700581000  | -1.005557000 |
| 1 | -5.548073000 | 1.308053000  | -2.420071000 |
| 1 | 0.724707000  | 0.852386000  | -2.814241000 |

1 -0.591260000 -1.155290000 -2.753816000

**6Ge-H<sub>2</sub><sup>12+</sup>, T. E.= -6765.935990**

32 -2.352008000 -0.230504000 -0.899626000  
7 -2.835347000 1.371439000 0.136187000  
6 -3.442599000 1.068079000 1.275787000  
6 -3.448846000 -0.309281000 1.629715000  
7 -2.852354000 -1.129382000 0.775330000  
32 0.175010000 -0.362412000 -1.039957000  
1 -3.954344000 1.828498000 1.871855000  
1 -3.959938000 -0.683799000 2.520648000  
32 1.776431000 -0.084937000 0.981880000  
7 2.757901000 1.498526000 0.260396000  
6 3.922794000 1.189177000 -0.276012000  
6 4.197515000 -0.205884000 -0.414676000  
7 3.258154000 -1.024832000 0.017884000  
1 4.643009000 1.957715000 -0.571237000  
1 5.138781000 -0.577670000 -0.829633000  
6 -2.879967000 2.741870000 -0.406973000  
1 -2.057557000 2.884364000 -1.118400000  
1 -3.831151000 2.910312000 -0.933364000  
1 -2.791836000 3.471348000 0.409246000  
6 -2.901767000 -2.591521000 0.965046000  
1 -2.785581000 -2.834875000 2.029645000  
1 -3.865589000 -2.986335000 0.610762000  
1 -2.097207000 -3.067314000 0.391592000  
6 3.451972000 -2.484061000 -0.000124000  
1 3.771627000 -2.827303000 0.995085000  
1 2.505127000 -2.978291000 -0.254121000  
1 4.216172000 -2.759873000 -0.738298000  
6 2.398021000 2.899517000 0.534370000  
1 2.693654000 3.167269000 1.559834000  
1 2.906019000 3.569896000 -0.171226000  
1 1.312301000 3.025527000 0.438964000  
1 0.353288000 -1.833831000 -1.508722000  
1 0.540170000 0.568020000 -2.227474000

**7Ge-H<sub>2</sub><sup>12+</sup>, T. E.= -8872.42694**

6 -4.606643000 0.950918000 0.677829000  
6 -3.175952000 1.574056000 0.663867000  
32 -2.111919000 0.067915000 -0.099154000  
6 -3.523789000 -1.297019000 -0.022343000  
6 -4.579123000 -0.587469000 0.882761000  
1 -5.108560000 1.189405000 -0.275553000



|    |              |              |              |
|----|--------------|--------------|--------------|
| 32 | -0.019092000 | 0.084664000  | -1.457316000 |
| 1  | -5.581448000 | -0.997960000 | 0.680133000  |
| 32 | 2.193735000  | -0.044397000 | -0.313014000 |
| 6  | 3.114820000  | -1.495937000 | 0.636855000  |
| 6  | 4.511448000  | -0.841697000 | 0.892332000  |
| 6  | 4.426204000  | 0.688676000  | 1.135384000  |
| 6  | 3.518643000  | 1.400621000  | 0.084994000  |
| 1  | 5.166714000  | -1.037144000 | 0.025010000  |
| 1  | 5.441259000  | 1.116470000  | 1.113152000  |
| 14 | -4.027217000 | -1.330717000 | -1.908833000 |
| 1  | -3.355534000 | -0.145177000 | -2.576005000 |
| 1  | -3.498498000 | -2.572152000 | -2.547445000 |
| 1  | -5.507760000 | -1.173088000 | -2.010029000 |
| 14 | -3.007220000 | -3.051559000 | 0.581240000  |
| 1  | -1.810396000 | -3.480970000 | -0.210555000 |
| 1  | -2.658870000 | -2.952242000 | 2.035149000  |
| 1  | -4.151698000 | -3.986210000 | 0.360712000  |
| 14 | -3.048264000 | 3.321997000  | -0.127352000 |
| 1  | -1.592750000 | 3.665018000  | -0.232785000 |
| 1  | -3.671795000 | 3.255846000  | -1.484953000 |
| 1  | -3.753977000 | 4.299479000  | 0.755141000  |
| 14 | -2.171452000 | 1.326837000  | 2.266320000  |
| 1  | -1.322367000 | 0.054672000  | 1.771977000  |
| 1  | -1.107231000 | 2.341302000  | 2.507485000  |
| 1  | -2.887417000 | 0.817274000  | 3.469842000  |
| 14 | 2.908738000  | 3.154069000  | 0.571590000  |
| 1  | 2.260314000  | 3.051072000  | 1.917653000  |
| 1  | 4.074105000  | 4.087684000  | 0.606126000  |
| 1  | 1.905611000  | 3.593123000  | -0.451330000 |
| 14 | 4.075939000  | 1.197485000  | -1.729732000 |
| 1  | 5.435093000  | 0.647869000  | -1.993523000 |
| 1  | 3.106955000  | -0.057734000 | -2.067005000 |
| 1  | 3.564709000  | 2.234919000  | -2.667293000 |
| 14 | 2.099041000  | -1.742324000 | 2.273586000  |
| 1  | 3.019685000  | -2.324749000 | 3.294317000  |
| 1  | 1.569119000  | -0.416291000 | 2.754527000  |
| 1  | 0.928566000  | -2.629001000 | 1.983808000  |
| 14 | 3.201652000  | -3.169056000 | -0.328899000 |
| 1  | 4.112616000  | -2.962561000 | -1.499142000 |
| 1  | 3.726718000  | -4.220514000 | 0.594166000  |
| 1  | 1.818998000  | -3.510660000 | -0.791571000 |
| 1  | 5.001531000  | -1.322737000 | 1.754254000  |
| 1  | 4.028200000  | 0.885843000  | 2.144908000  |
| 1  | -4.365393000 | -0.815658000 | 1.941799000  |
| 1  | -5.215723000 | 1.413048000  | 1.471189000  |
| 1  | -0.107904000 | -1.157780000 | -2.368413000 |

1 -0.020733000 1.400638000 -2.263184000

**8Ge-H<sub>2</sub><sup>12+</sup>, T. E.= -6920.66030**

6 4.183335000 1.327658000 -1.324399000  
7 3.349463000 0.230915000 -1.503715000  
32 2.577868000 -0.823575000 -0.140420000  
7 3.324452000 0.148744000 1.341876000  
6 4.203901000 1.162446000 1.198180000  
6 4.582437000 1.731956000 -0.007197000  
32 -0.000019000 -1.339241000 -0.000233000  
1 4.640093000 1.560926000 2.120891000  
1 5.272061000 2.574127000 0.051545000  
32 -2.578028000 -0.823700000 0.140097000  
7 -3.349442000 0.230788000 1.503534000  
6 -4.183010000 1.327771000 1.324368000  
6 -4.581966000 1.732396000 0.007222000  
6 -4.203529000 1.162987000 -1.198239000  
7 -3.324338000 0.149093000 -1.342064000  
1 -5.271377000 2.574750000 -0.051402000  
1 -4.639588000 1.561736000 -2.120898000  
6 4.685886000 2.064729000 -2.394467000  
1 5.375596000 2.885828000 -2.203000000  
1 4.435254000 1.859511000 -3.433128000  
6 3.058416000 -0.213626000 -2.879047000  
1 2.496125000 0.553123000 -3.434622000  
1 3.987053000 -0.448131000 -3.420852000  
1 2.450310000 -1.128801000 -2.844447000  
6 3.064237000 -0.347933000 2.707603000  
1 2.717945000 0.476708000 3.347719000  
1 2.292288000 -1.127514000 2.679191000  
1 3.978586000 -0.780512000 3.141582000  
6 -3.058573000 -0.214068000 2.878802000  
1 -3.987296000 -0.448402000 3.420535000  
1 -2.450727000 -1.129411000 2.844070000  
1 -2.496080000 0.552421000 3.434531000  
6 -3.064143000 -0.347377000 -2.707868000  
1 -3.978683000 -0.779208000 -3.142186000  
1 -2.717130000 0.477206000 -3.347671000  
1 -2.292736000 -1.127497000 -2.679491000  
6 -4.685424000 2.064802000 2.394536000  
1 -5.374931000 2.886096000 2.203173000  
1 -4.434883000 1.859357000 3.433175000  
1 0.074489000 -2.337540000 1.206255000  
1 -0.074345000 -2.337305000 -1.206919000

**9Ge(H)-H<sub>2</sub><sup>12+</sup>, T. E.= -6689.67610**

|    |              |              |              |
|----|--------------|--------------|--------------|
| 6  | 4.189253000  | 0.272493000  | -0.443314000 |
| 7  | 3.669390000  | -0.909767000 | -0.105077000 |
| 32 | 2.091370000  | -0.022092000 | 0.616044000  |
| 7  | 3.341187000  | 1.262337000  | -0.149716000 |
| 32 | -2.091325000 | -0.021688000 | 0.616012000  |
| 7  | -3.669314000 | -0.909919000 | -0.104496000 |
| 6  | -4.189335000 | 0.272106000  | -0.443314000 |
| 7  | -3.341321000 | 1.262188000  | -0.150379000 |
| 6  | 4.285544000  | -2.231828000 | -0.213245000 |
| 1  | 3.649994000  | -2.905552000 | -0.803767000 |
| 1  | 5.256855000  | -2.136933000 | -0.718791000 |
| 1  | 4.448878000  | -2.665181000 | 0.783249000  |
| 6  | 3.554799000  | 2.701418000  | -0.295400000 |
| 1  | 2.761621000  | 3.148198000  | -0.910172000 |
| 1  | 3.575474000  | 3.192349000  | 0.687665000  |
| 1  | 4.519195000  | 2.874929000  | -0.793195000 |
| 6  | -3.555003000 | 2.701163000  | -0.296999000 |
| 1  | -4.519552000 | 2.874311000  | -0.794622000 |
| 1  | -3.575401000 | 3.192758000  | 0.685739000  |
| 1  | -2.762017000 | 3.147549000  | -0.912308000 |
| 6  | -4.285372000 | -2.232094000 | -0.211809000 |
| 1  | -5.256693000 | -2.137600000 | -0.717410000 |
| 1  | -3.649774000 | -2.906150000 | -0.801900000 |
| 1  | -4.448665000 | -2.664815000 | 0.784967000  |
| 1  | -5.179679000 | 0.412209000  | -0.894138000 |
| 1  | 5.179545000  | 0.412941000  | -0.894144000 |
| 32 | -0.000007000 | -0.459635000 | -0.643341000 |
| 1  | -2.112366000 | 0.016950000  | 2.157793000  |
| 1  | 2.112531000  | 0.015687000  | 2.157844000  |
| 1  | 0.000076000  | 0.380265000  | -1.933253000 |
| 1  | -0.000136000 | -1.976060000 | -0.930283000 |

**9Ge(Me)-H<sub>2</sub><sup>12+</sup>, T. E.= -6768.31526**

|    |              |              |              |
|----|--------------|--------------|--------------|
| 6  | 3.972873000  | 0.441134000  | -0.954214000 |
| 7  | 3.630136000  | -0.786735000 | -0.562476000 |
| 32 | 2.149605000  | -0.055545000 | 0.498182000  |
| 7  | 3.141572000  | 1.351719000  | -0.441332000 |
| 32 | -2.149648000 | -0.055796000 | 0.498176000  |
| 7  | -3.630157000 | -0.786486000 | -0.562855000 |
| 6  | -3.972806000 | 0.441556000  | -0.954125000 |
| 7  | -3.141467000 | 1.351892000  | -0.440863000 |
| 6  | 4.306374000  | -2.045720000 | -0.869132000 |
| 1  | 3.613990000  | -2.749423000 | -1.351282000 |

|    |              |              |              |
|----|--------------|--------------|--------------|
| 1  | 5.141657000  | -1.853628000 | -1.557367000 |
| 1  | 4.705454000  | -2.504130000 | 0.046611000  |
| 6  | 3.196422000  | 2.801256000  | -0.611630000 |
| 1  | 2.287908000  | 3.171200000  | -1.107626000 |
| 1  | 3.305953000  | 3.300801000  | 0.361142000  |
| 1  | 4.062720000  | 3.063781000  | -1.235204000 |
| 6  | -3.196230000 | 2.801497000  | -0.610619000 |
| 1  | -4.062512000 | 3.064303000  | -1.234096000 |
| 1  | -3.305736000 | 3.300687000  | 0.362337000  |
| 1  | -2.287695000 | 3.171576000  | -1.106476000 |
| 6  | -4.306419000 | -2.045318000 | -0.870082000 |
| 1  | -5.141733000 | -1.852890000 | -1.558187000 |
| 1  | -3.614067000 | -2.748804000 | -1.352596000 |
| 1  | -4.705465000 | -2.504154000 | 0.045461000  |
| 1  | -4.825871000 | 0.673856000  | -1.604346000 |
| 1  | 4.825984000  | 0.673131000  | -1.604482000 |
| 32 | 0.000012000  | -0.654258000 | -0.590379000 |
| 6  | -2.466444000 | -0.093119000 | 2.424792000  |
| 1  | -1.845163000 | 0.665686000  | 2.920477000  |
| 1  | -3.527096000 | 0.117738000  | 2.614761000  |
| 1  | -2.208491000 | -1.084974000 | 2.821776000  |
| 6  | 2.466275000  | -0.092146000 | 2.424834000  |
| 1  | 1.845050000  | 0.666923000  | 2.920183000  |
| 1  | 2.208192000  | -1.083818000 | 2.822192000  |
| 1  | 3.526939000  | 0.118668000  | 2.614787000  |
| 1  | -0.000011000 | -0.074156000 | -2.018429000 |
| 1  | 0.000111000  | -2.200744000 | -0.617233000 |

**${}^9\text{Ge}(\text{Cl})\text{-H}_2^{12+}$ , T. E.= -7609.08288**

|    |              |              |              |
|----|--------------|--------------|--------------|
| 6  | 4.183830000  | -0.676648000 | -0.267696000 |
| 7  | 3.219914000  | -1.285645000 | 0.428204000  |
| 32 | 2.010020000  | 0.198282000  | 0.056985000  |
| 7  | 3.759825000  | 0.490809000  | -0.756992000 |
| 32 | -2.012399000 | -0.199341000 | 0.066392000  |
| 7  | -3.769659000 | -0.505029000 | -0.726406000 |
| 6  | -4.172878000 | 0.692925000  | -0.297221000 |
| 7  | -3.196863000 | 1.320878000  | 0.364269000  |
| 6  | 3.278459000  | -2.556420000 | 1.149127000  |
| 1  | 2.560536000  | -3.274639000 | 0.730040000  |
| 1  | 4.289437000  | -2.977356000 | 1.056082000  |
| 1  | 3.061612000  | -2.399156000 | 2.214462000  |
| 6  | 4.510564000  | 1.492379000  | -1.513828000 |
| 1  | 4.050431000  | 1.660756000  | -2.496915000 |
| 1  | 4.546878000  | 2.439693000  | -0.958656000 |
| 1  | 5.538358000  | 1.133676000  | -1.665042000 |

|    |              |              |              |
|----|--------------|--------------|--------------|
| 6  | -3.238085000 | 2.619400000  | 1.035266000  |
| 1  | -4.244627000 | 3.047994000  | 0.929880000  |
| 1  | -3.018529000 | 2.501455000  | 2.105168000  |
| 1  | -2.513866000 | 3.312282000  | 0.585602000  |
| 6  | -4.532099000 | -1.522630000 | -1.449330000 |
| 1  | -5.563850000 | -1.169696000 | -1.586504000 |
| 1  | -4.091200000 | -1.710623000 | -2.437852000 |
| 1  | -4.555138000 | -2.458010000 | -0.873901000 |
| 1  | -5.175552000 | 1.106266000  | -0.463123000 |
| 1  | 5.192673000  | -1.081703000 | -0.415775000 |
| 32 | 0.000384000  | -0.054265000 | -1.385192000 |
| 17 | -1.692730000 | -1.366523000 | 1.828228000  |
| 17 | 1.675578000  | 1.447167000  | 1.759272000  |
| 1  | 0.106630000  | -1.377003000 | -2.166945000 |
| 1  | -0.099631000 | 1.204357000  | -2.267332000 |

**9Ge(NMe<sub>2</sub>)-H<sub>2</sub><sup>12+</sup>, T. E.= -6957.61503**

|    |              |              |              |
|----|--------------|--------------|--------------|
| 6  | -3.513188000 | -1.415662000 | 1.201854000  |
| 7  | -3.519740000 | -1.460947000 | -0.122906000 |
| 32 | -2.150796000 | 0.011819000  | -0.178870000 |
| 7  | -2.695006000 | -0.455048000 | 1.648605000  |
| 32 | 2.112445000  | 0.108066000  | 0.044248000  |
| 7  | 3.700009000  | -0.285498000 | -1.121459000 |
| 6  | 4.110593000  | -1.202461000 | -0.254405000 |
| 7  | 3.305816000  | -1.252385000 | 0.812862000  |
| 6  | -4.276676000 | -2.361623000 | -0.987393000 |
| 1  | -3.601139000 | -3.012695000 | -1.560332000 |
| 1  | -4.938603000 | -2.994632000 | -0.379099000 |
| 1  | -4.893682000 | -1.783843000 | -1.689292000 |
| 6  | -2.426446000 | -0.089683000 | 3.036673000  |
| 1  | -1.385026000 | -0.311757000 | 3.311315000  |
| 1  | -2.616599000 | 0.980960000  | 3.194536000  |
| 1  | -3.088917000 | -0.659953000 | 3.703064000  |
| 6  | 3.359424000  | -2.199970000 | 1.923515000  |
| 1  | 4.364384000  | -2.641245000 | 1.984935000  |
| 1  | 3.156900000  | -1.676425000 | 2.866971000  |
| 1  | 2.627491000  | -3.012175000 | 1.798354000  |
| 6  | 4.347654000  | 0.129269000  | -2.362259000 |
| 1  | 5.238488000  | -0.489137000 | -2.543331000 |
| 1  | 3.662945000  | 0.008822000  | -3.213216000 |
| 1  | 4.658052000  | 1.182035000  | -2.301359000 |
| 1  | 4.997109000  | -1.835111000 | -0.387790000 |
| 1  | -4.102467000 | -2.072923000 | 1.853578000  |
| 32 | 0.044395000  | -0.774003000 | -0.990477000 |
| 7  | 2.104323000  | 1.616808000  | 1.030091000  |

|   |              |              |              |
|---|--------------|--------------|--------------|
| 7 | -2.679408000 | 1.670206000  | -0.649604000 |
| 6 | -2.086456000 | 2.397399000  | -1.781438000 |
| 1 | -1.902877000 | 3.444539000  | -1.492116000 |
| 1 | -1.126036000 | 1.952124000  | -2.079001000 |
| 1 | -2.754001000 | 2.390637000  | -2.658841000 |
| 6 | 3.336782000  | 2.087099000  | 1.687105000  |
| 1 | 3.101688000  | 2.407017000  | 2.714794000  |
| 1 | 4.080554000  | 1.281342000  | 1.745078000  |
| 1 | 3.779294000  | 2.940175000  | 1.146844000  |
| 6 | 1.035050000  | 2.618754000  | 0.957417000  |
| 1 | 0.764453000  | 2.942902000  | 1.975260000  |
| 1 | 1.348781000  | 3.506250000  | 0.382739000  |
| 1 | 0.134387000  | 2.200004000  | 0.483900000  |
| 6 | -3.970702000 | 2.210259000  | -0.189918000 |
| 1 | -3.833352000 | 3.252803000  | 0.138579000  |
| 1 | -4.721967000 | 2.194033000  | -0.996585000 |
| 1 | -4.355767000 | 1.633299000  | 0.661509000  |
| 1 | 0.072900000  | -2.293560000 | -0.726548000 |
| 1 | 0.131448000  | -0.473931000 | -2.500773000 |

**9Ge(PMe<sub>2</sub>)-H<sub>2</sub><sup>12+</sup>, T. E.= -7530.91492**

|    |              |              |              |
|----|--------------|--------------|--------------|
| 6  | 4.062323000  | -1.422351000 | -0.436776000 |
| 7  | 3.299619000  | -1.447231000 | 0.657794000  |
| 32 | 2.133624000  | -0.030690000 | -0.067170000 |
| 7  | 3.613968000  | -0.524442000 | -1.311443000 |
| 32 | -2.120600000 | -0.174588000 | -0.078407000 |
| 7  | -2.479036000 | -0.757935000 | 1.770208000  |
| 6  | -3.367644000 | -1.659439000 | 1.344273000  |
| 7  | -3.468312000 | -1.641581000 | 0.017819000  |
| 6  | 3.435956000  | -2.331190000 | 1.810680000  |
| 1  | 2.605897000  | -3.051493000 | 1.856444000  |
| 1  | 4.378791000  | -2.892031000 | 1.736229000  |
| 1  | 3.453548000  | -1.747844000 | 2.741414000  |
| 6  | 4.200409000  | -0.167494000 | -2.598547000 |
| 1  | 3.465607000  | -0.294156000 | -3.405822000 |
| 1  | 4.549148000  | 0.875077000  | -2.594793000 |
| 1  | 5.059632000  | -0.821411000 | -2.807425000 |
| 6  | -4.265768000 | -2.525859000 | -0.825677000 |
| 1  | -4.894129000 | -3.171214000 | -0.194665000 |
| 1  | -4.921408000 | -1.939979000 | -1.484106000 |
| 1  | -3.620294000 | -3.165782000 | -1.444523000 |
| 6  | -2.180434000 | -0.405124000 | 3.154779000  |
| 1  | -2.733054000 | -1.072451000 | 3.831791000  |
| 1  | -1.106731000 | -0.514257000 | 3.361101000  |
| 1  | -2.477375000 | 0.631385000  | 3.370364000  |

|    |              |              |              |
|----|--------------|--------------|--------------|
| 1  | -3.939285000 | -2.325310000 | 2.004132000  |
| 1  | 4.943730000  | -2.058101000 | -0.593228000 |
| 32 | 0.036080000  | -1.070934000 | -0.928179000 |
| 15 | -2.681446000 | 2.069900000  | -0.425405000 |
| 15 | 2.174152000  | 1.829681000  | 1.348612000  |
| 6  | 1.483618000  | 3.196347000  | 0.266846000  |
| 1  | 2.057064000  | 3.377293000  | -0.650787000 |
| 1  | 0.429197000  | 2.999667000  | 0.026479000  |
| 1  | 1.512082000  | 4.110059000  | 0.879951000  |
| 6  | -4.463598000 | 2.144814000  | 0.137132000  |
| 1  | -5.130809000 | 1.464674000  | -0.407407000 |
| 1  | -4.529386000 | 1.954912000  | 1.216417000  |
| 1  | -4.799814000 | 3.179055000  | -0.034905000 |
| 6  | -2.840603000 | 2.131358000  | -2.294210000 |
| 1  | -3.623244000 | 1.476254000  | -2.696818000 |
| 1  | -3.092981000 | 3.172491000  | -2.545770000 |
| 1  | -1.878770000 | 1.903358000  | -2.773201000 |
| 6  | 3.996114000  | 2.245000000  | 1.416936000  |
| 1  | 4.429174000  | 2.511919000  | 0.444544000  |
| 1  | 4.091351000  | 3.109141000  | 2.092596000  |
| 1  | 4.557065000  | 1.414877000  | 1.865939000  |
| 1  | 0.034339000  | -0.835315000 | -2.456329000 |
| 1  | 0.092825000  | -2.583787000 | -0.618804000 |

**10Ge(H)-H<sub>2</sub><sup>12+</sup>, T. E.= -7912.24921**

|    |              |              |              |
|----|--------------|--------------|--------------|
| 6  | -4.481543000 | -0.533997000 | -0.493503000 |
| 6  | -4.048774000 | -1.463232000 | 0.490886000  |
| 6  | -2.768238000 | -1.254835000 | 1.004407000  |
| 32 | -2.020388000 | 0.491275000  | 0.418772000  |
| 6  | -3.575885000 | 0.475715000  | -0.819088000 |
| 1  | -5.490937000 | -0.619982000 | -0.907521000 |
| 1  | -4.731473000 | -2.250297000 | 0.825663000  |
| 15 | -3.995008000 | 1.757458000  | -1.955354000 |
| 1  | -2.907779000 | 2.646798000  | -2.132859000 |
| 1  | -4.316508000 | 1.303460000  | -3.265322000 |
| 15 | -2.143733000 | -2.241217000 | 2.323463000  |
| 1  | -0.747615000 | -2.050211000 | 2.482157000  |
| 1  | -2.668609000 | -2.025615000 | 3.633644000  |
| 32 | -0.013420000 | -0.007903000 | -0.996759000 |
| 32 | 1.995693000  | -0.396258000 | 0.454944000  |
| 6  | 2.875972000  | 1.353252000  | 0.789396000  |
| 6  | 4.150628000  | 1.400332000  | 0.223331000  |
| 6  | 4.489177000  | 0.323832000  | -0.640131000 |
| 6  | 3.508438000  | -0.653510000 | -0.807667000 |
| 1  | 4.897224000  | 2.170439000  | 0.440667000  |

|    |              |              |              |
|----|--------------|--------------|--------------|
| 1  | 5.488667000  | 0.283056000  | -1.083806000 |
| 15 | 3.800469000  | -2.095173000 | -1.779811000 |
| 1  | 4.086306000  | -1.835889000 | -3.149747000 |
| 1  | 4.860547000  | -2.963396000 | -1.380871000 |
| 15 | 2.350131000  | 2.567375000  | 1.952297000  |
| 1  | 1.037068000  | 2.293107000  | 2.406353000  |
| 1  | 3.108333000  | 2.725897000  | 3.151861000  |
| 1  | 2.656372000  | -2.928919000 | -1.796645000 |
| 1  | 2.286387000  | 3.891841000  | 1.434374000  |
| 1  | -5.091626000 | 2.608064000  | -1.622915000 |
| 1  | -2.308081000 | -3.641463000 | 2.132299000  |
| 1  | 0.184214000  | 1.188274000  | -1.971821000 |
| 1  | -0.199357000 | -1.294757000 | -1.852851000 |

**10Ge(Me)-H<sub>2</sub><sup>12+</sup>, T. E. =-8384.03909**

|    |              |              |              |
|----|--------------|--------------|--------------|
| 6  | -3.862975000 | -0.019556000 | 0.837521000  |
| 6  | -3.338802000 | 1.194929000  | 1.352115000  |
| 6  | -2.259809000 | 1.765215000  | 0.660688000  |
| 32 | -1.981537000 | 0.786273000  | -1.019924000 |
| 6  | -3.247416000 | -0.546830000 | -0.308245000 |
| 1  | -4.766792000 | -0.441306000 | 1.290223000  |
| 1  | -3.847696000 | 1.677896000  | 2.193620000  |
| 15 | -4.054106000 | -1.810835000 | -1.267495000 |
| 15 | -1.672702000 | 3.398573000  | 1.033656000  |
| 32 | 0.301982000  | 0.011577000  | -1.599252000 |
| 32 | 2.068400000  | -1.191239000 | -0.263789000 |
| 6  | 3.642428000  | -0.010210000 | -0.014448000 |
| 6  | 3.950144000  | 0.083275000  | 1.342980000  |
| 6  | 3.002810000  | -0.466322000 | 2.254235000  |
| 6  | 1.860884000  | -1.045885000 | 1.700034000  |
| 1  | 4.897148000  | 0.472877000  | 1.733622000  |
| 1  | 3.244208000  | -0.487044000 | 3.323000000  |
| 15 | 0.678749000  | -1.898221000 | 2.708926000  |
| 15 | 4.839952000  | 0.435951000  | -1.254228000 |
| 6  | -0.513383000 | 3.967383000  | -0.259150000 |
| 1  | 0.305169000  | 3.242581000  | -0.363654000 |
| 1  | -1.041877000 | 4.056688000  | -1.217416000 |
| 1  | -0.101444000 | 4.946674000  | 0.021283000  |
| 6  | -0.772555000 | 3.457905000  | 2.632077000  |
| 1  | 0.103716000  | 2.798451000  | 2.577311000  |
| 1  | -0.447265000 | 4.485680000  | 2.846528000  |
| 1  | -1.435510000 | 3.115029000  | 3.437985000  |
| 6  | -3.020194000 | 4.639466000  | 1.142986000  |
| 1  | -3.717551000 | 4.363000000  | 1.945404000  |
| 1  | -2.605169000 | 5.635286000  | 1.354236000  |



|   |              |              |              |
|---|--------------|--------------|--------------|
| 1 | -3.565488000 | 4.662353000  | 0.190067000  |
| 6 | -2.887768000 | -2.586378000 | -2.440593000 |
| 1 | -3.419409000 | -3.321274000 | -3.060959000 |
| 1 | -2.453884000 | -1.815296000 | -3.091528000 |
| 1 | -2.081314000 | -3.088714000 | -1.891166000 |
| 6 | -5.451500000 | -1.157304000 | -2.262572000 |
| 1 | -6.188210000 | -0.693811000 | -1.592514000 |
| 1 | -5.070816000 | -0.394714000 | -2.955260000 |
| 1 | -5.930145000 | -1.967670000 | -2.831062000 |
| 6 | -4.738745000 | -3.135545000 | -0.200700000 |
| 1 | -3.930678000 | -3.595732000 | 0.382299000  |
| 1 | -5.485237000 | -2.714943000 | 0.486277000  |
| 1 | -5.221905000 | -3.902321000 | -0.822301000 |
| 6 | 5.246045000  | 2.222298000  | -1.170221000 |
| 1 | 5.658242000  | 2.458648000  | -0.179888000 |
| 1 | 5.986569000  | 2.479738000  | -1.940496000 |
| 1 | 4.332328000  | 2.810210000  | -1.327562000 |
| 6 | 6.421733000  | -0.479068000 | -1.085879000 |
| 1 | 7.120358000  | -0.182154000 | -1.881131000 |
| 1 | 6.872039000  | -0.260682000 | -0.108195000 |
| 1 | 6.222416000  | -1.556967000 | -1.153380000 |
| 6 | 4.188501000  | 0.094666000  | -2.926022000 |
| 1 | 3.268940000  | 0.672601000  | -3.089213000 |
| 1 | 4.936451000  | 0.380893000  | -3.678259000 |
| 1 | 3.967098000  | -0.976511000 | -3.025286000 |
| 6 | 1.441583000  | -3.014404000 | 3.950290000  |
| 1 | 2.052480000  | -3.766457000 | 3.433311000  |
| 1 | 2.086586000  | -2.435310000 | 4.625012000  |
| 1 | 0.661811000  | -3.513545000 | 4.543035000  |
| 6 | -0.390095000 | -0.728521000 | 3.633603000  |
| 1 | -1.121847000 | -1.280283000 | 4.240566000  |
| 1 | 0.234837000  | -0.110645000 | 4.292566000  |
| 1 | -0.916845000 | -0.086340000 | 2.914017000  |
| 6 | -0.430438000 | -2.905599000 | 1.663486000  |
| 1 | 0.161177000  | -3.630675000 | 1.089366000  |
| 1 | -1.147530000 | -3.440112000 | 2.301923000  |
| 1 | -0.973892000 | -2.238074000 | 0.977789000  |
| 1 | 0.023982000  | -0.904222000 | -2.829544000 |
| 1 | 0.970823000  | 1.275548000  | -2.231741000 |

**1Si-BH<sub>3</sub>, T. E.= -1428.63438**

|    |              |              |              |
|----|--------------|--------------|--------------|
| 14 | -0.035111000 | -0.603213000 | 2.185774000  |
| 14 | -1.343481000 | 0.154702000  | 0.436069000  |
| 14 | 1.375303000  | -0.240270000 | 0.390476000  |
| 7  | -1.865805000 | 1.748032000  | -0.146402000 |

|   |              |              |              |
|---|--------------|--------------|--------------|
| 7 | -2.581688000 | -0.588243000 | -0.590191000 |
| 7 | 2.551850000  | 1.046846000  | 0.056627000  |
| 7 | 2.025936000  | -1.140057000 | -0.991360000 |
| 6 | -2.892823000 | 1.647259000  | -1.077676000 |
| 1 | -3.305632000 | 2.539463000  | -1.545420000 |
| 6 | -3.291522000 | 0.362174000  | -1.313656000 |
| 1 | -4.086177000 | 0.056436000  | -1.992222000 |
| 6 | 3.045223000  | -0.446071000 | -1.629152000 |
| 1 | 3.538446000  | -0.870452000 | -2.502185000 |
| 6 | 3.334657000  | 0.759973000  | -1.055499000 |
| 1 | 4.096326000  | 1.460405000  | -1.393808000 |
| 6 | -1.334702000 | 3.049858000  | 0.242895000  |
| 6 | -2.918109000 | -2.010564000 | -0.693030000 |
| 6 | 1.586363000  | -2.447684000 | -1.480244000 |
| 6 | 2.773895000  | 2.262282000  | 0.834193000  |
| 1 | -2.746641000 | -2.380299000 | -1.717100000 |
| 1 | 2.551448000  | 3.165015000  | 0.241657000  |
| 1 | 0.875975000  | -2.879971000 | -0.763065000 |
| 1 | -0.797382000 | 3.532203000  | -0.590409000 |
| 1 | -2.290111000 | -2.583218000 | 0.001847000  |
| 1 | -3.974642000 | -2.177139000 | -0.428967000 |
| 1 | 2.116647000  | 2.249704000  | 1.714748000  |
| 1 | 3.817391000  | 2.318633000  | 1.183823000  |
| 1 | -2.144930000 | 3.718315000  | 0.575900000  |
| 1 | -0.634975000 | 2.917850000  | 1.079535000  |
| 1 | 1.094048000  | -2.356944000 | -2.462328000 |
| 1 | 2.443954000  | -3.132351000 | -1.574860000 |
| 5 | -0.385945000 | -2.689583000 | 2.071104000  |
| 1 | -0.373589000 | -3.217576000 | 0.973469000  |
| 1 | -1.473786000 | -2.745881000 | 2.623116000  |
| 1 | 0.539449000  | -3.052733000 | 2.780574000  |

**2Si-BH<sub>3</sub>, T. E.= -3535.13644**

|    |              |              |              |
|----|--------------|--------------|--------------|
| 6  | -3.831854000 | -1.540444000 | -0.742416000 |
| 6  | -2.365197000 | -1.246662000 | -1.190531000 |
| 14 | -1.821108000 | 0.154449000  | -0.005556000 |
| 6  | -3.577120000 | 0.630326000  | 0.571329000  |
| 6  | -4.526831000 | -0.222207000 | -0.330607000 |
| 1  | -3.820747000 | -2.232552000 | 0.117439000  |
| 14 | -0.014781000 | 1.495595000  | 0.047680000  |
| 1  | -5.485192000 | -0.434730000 | 0.172789000  |
| 14 | 1.809024000  | 0.178013000  | 0.031207000  |
| 6  | 3.535388000  | 0.627875000  | -0.650167000 |
| 6  | 4.527824000  | -0.173087000 | 0.253468000  |
| 6  | 3.862197000  | -1.472141000 | 0.761687000  |

|    |              |              |              |
|----|--------------|--------------|--------------|
| 6  | 2.413577000  | -1.165184000 | 1.254874000  |
| 1  | 4.814672000  | 0.446413000  | 1.122739000  |
| 1  | 4.473495000  | -1.924720000 | 1.560904000  |
| 14 | -3.677178000 | 0.073123000  | 2.410309000  |
| 1  | -3.183784000 | -1.336730000 | 2.585393000  |
| 1  | -2.858632000 | 0.973860000  | 3.281842000  |
| 1  | -5.116816000 | 0.114171000  | 2.842491000  |
| 14 | -4.004325000 | 2.496748000  | 0.488855000  |
| 1  | -3.054117000 | 3.311286000  | 1.303942000  |
| 1  | -3.989380000 | 2.934290000  | -0.945465000 |
| 1  | -5.398824000 | 2.683840000  | 1.022454000  |
| 14 | -1.303521000 | -2.814669000 | -1.351654000 |
| 1  | 0.153909000  | -2.465113000 | -1.412813000 |
| 1  | -1.562364000 | -3.735382000 | -0.196231000 |
| 1  | -1.661958000 | -3.538858000 | -2.619903000 |
| 14 | -2.322676000 | -0.397882000 | -2.928705000 |
| 1  | -2.778499000 | 1.030393000  | -2.882329000 |
| 1  | -0.928874000 | -0.442854000 | -3.473551000 |
| 1  | -3.251819000 | -1.167996000 | -3.828283000 |
| 14 | 1.363194000  | -2.726359000 | 1.529902000  |
| 1  | 1.620927000  | -3.718434000 | 0.435103000  |
| 1  | 1.733078000  | -3.366103000 | 2.839715000  |
| 1  | -0.096198000 | -2.383301000 | 1.578528000  |
| 14 | 2.431052000  | -0.243074000 | 2.955465000  |
| 1  | 3.392109000  | -0.975113000 | 3.853255000  |
| 1  | 2.882289000  | 1.182657000  | 2.835779000  |
| 1  | 1.057387000  | -0.266746000 | 3.550877000  |
| 14 | 3.544296000  | -0.037319000 | -2.456486000 |
| 1  | 4.948320000  | 0.041853000  | -2.990104000 |
| 1  | 3.113145000  | -1.476908000 | -2.511423000 |
| 1  | 2.624647000  | 0.765773000  | -3.322011000 |
| 14 | 3.991427000  | 2.487999000  | -0.703697000 |
| 1  | 3.898227000  | 3.067782000  | 0.675303000  |
| 1  | 5.421079000  | 2.591737000  | -1.162031000 |
| 1  | 3.122469000  | 3.238568000  | -1.659774000 |
| 1  | 5.465360000  | -0.405548000 | -0.279473000 |
| 1  | 3.822361000  | -2.208209000 | -0.059835000 |
| 1  | -4.779500000 | 0.350648000  | -1.241318000 |
| 1  | -4.404972000 | -2.039690000 | -1.542116000 |
| 5  | -0.045244000 | 3.581822000  | 0.060092000  |
| 1  | -0.418302000 | 3.790184000  | 1.199728000  |
| 1  | -0.815796000 | 3.883495000  | -0.824240000 |
| 1  | 1.124948000  | 3.839321000  | -0.136147000 |

**3Si-BH<sub>3</sub>, T. E.= -1583.40734**

|    |              |              |              |
|----|--------------|--------------|--------------|
| 6  | 3.038703000  | -1.604938000 | -0.846290000 |
| 7  | 2.053874000  | -1.284511000 | 0.129380000  |
| 14 | 1.440446000  | 0.319531000  | 0.500439000  |
| 7  | 2.506224000  | 1.357506000  | -0.425302000 |
| 6  | 3.484076000  | 0.829747000  | -1.268517000 |
| 6  | 3.725751000  | -0.486340000 | -1.476307000 |
| 14 | 0.036255000  | 0.985063000  | 2.204710000  |
| 1  | 4.077446000  | 1.579473000  | -1.799900000 |
| 1  | 4.512835000  | -0.745915000 | -2.184264000 |
| 14 | -1.399919000 | 0.112978000  | 0.623966000  |
| 7  | -2.199919000 | 0.818905000  | -0.764276000 |
| 6  | -3.211042000 | 0.213013000  | -1.562066000 |
| 6  | -3.630595000 | -1.129518000 | -1.182811000 |
| 6  | -3.192144000 | -1.845212000 | -0.121606000 |
| 7  | -2.239916000 | -1.417243000 | 0.808966000  |
| 1  | -4.378215000 | -1.595098000 | -1.825339000 |
| 1  | -3.595345000 | -2.845197000 | 0.061873000  |
| 6  | 3.358845000  | -2.889231000 | -1.168520000 |
| 1  | 4.141648000  | -3.069943000 | -1.903665000 |
| 1  | 2.874659000  | -3.760851000 | -0.736573000 |
| 6  | 1.474792000  | -2.415104000 | 0.858516000  |
| 1  | 0.867404000  | -3.054108000 | 0.195369000  |
| 1  | 2.278717000  | -3.028872000 | 1.296985000  |
| 1  | 0.842374000  | -2.033495000 | 1.671669000  |
| 6  | 2.398862000  | 2.825802000  | -0.373241000 |
| 1  | 2.161638000  | 3.232276000  | -1.369734000 |
| 1  | 1.605112000  | 3.116658000  | 0.327321000  |
| 1  | 3.346162000  | 3.265803000  | -0.023232000 |
| 6  | -1.759662000 | 2.158544000  | -1.176411000 |
| 1  | -2.614379000 | 2.853877000  | -1.180435000 |
| 1  | -1.016956000 | 2.537955000  | -0.462282000 |
| 1  | -1.323760000 | 2.127869000  | -2.188727000 |
| 6  | -2.044558000 | -2.277395000 | 1.983405000  |
| 1  | -2.998840000 | -2.425536000 | 2.513972000  |
| 1  | -1.641856000 | -3.261704000 | 1.693594000  |
| 1  | -1.338938000 | -1.792149000 | 2.671697000  |
| 6  | -3.764109000 | 0.832445000  | -2.640737000 |
| 1  | -4.531297000 | 0.312366000  | -3.212577000 |
| 1  | -3.487987000 | 1.829208000  | -2.973408000 |
| 5  | -0.111288000 | 3.049977000  | 2.269306000  |
| 1  | 0.974725000  | 3.326342000  | 2.754892000  |
| 1  | -1.024189000 | 3.092092000  | 3.082808000  |
| 1  | -0.364818000 | 3.649559000  | 1.241961000  |

**4Si(H)-BH<sub>3</sub>, T. E.= -1352.37907**

|    |              |              |              |
|----|--------------|--------------|--------------|
| 6  | 3.655786000  | 0.446857000  | -0.070988000 |
| 7  | 2.604997000  | 1.187244000  | -0.420086000 |
| 14 | 1.525712000  | -0.390110000 | -0.634166000 |
| 7  | 3.342638000  | -0.837681000 | -0.198295000 |
| 14 | -1.504163000 | -0.372259000 | -0.700027000 |
| 7  | -2.547534000 | 1.209663000  | -0.410962000 |
| 6  | -3.606543000 | 0.471724000  | -0.078509000 |
| 7  | -3.326943000 | -0.809287000 | -0.290427000 |
| 6  | 2.402905000  | 2.589562000  | -0.105221000 |
| 1  | 1.711053000  | 2.696422000  | 0.746591000  |
| 1  | 3.360627000  | 3.067319000  | 0.155745000  |
| 1  | 1.979428000  | 3.116635000  | -0.972863000 |
| 6  | 4.211099000  | -1.981134000 | -0.022238000 |
| 1  | 3.696672000  | -2.745231000 | 0.579089000  |
| 1  | 4.484963000  | -2.432742000 | -0.990344000 |
| 1  | 5.135672000  | -1.690686000 | 0.501566000  |
| 6  | -4.217216000 | -1.941084000 | -0.152582000 |
| 1  | -5.129794000 | -1.653056000 | 0.392994000  |
| 1  | -4.510416000 | -2.345478000 | -1.135720000 |
| 1  | -3.713978000 | -2.740366000 | 0.411463000  |
| 6  | -2.292145000 | 2.570841000  | 0.029077000  |
| 1  | -3.232169000 | 3.057571000  | 0.333760000  |
| 1  | -1.599395000 | 2.572161000  | 0.886585000  |
| 1  | -1.850081000 | 3.156566000  | -0.790191000 |
| 1  | -4.549138000 | 0.859221000  | 0.334068000  |
| 1  | 4.618675000  | 0.836483000  | 0.290234000  |
| 14 | -0.025081000 | -1.031100000 | 0.893394000  |
| 1  | -1.435460000 | -0.539505000 | -2.197609000 |
| 1  | 1.480804000  | -0.618290000 | -2.124562000 |
| 5  | -0.212212000 | 0.221769000  | 2.570901000  |
| 1  | -1.423654000 | 0.310326000  | 2.730112000  |
| 1  | 0.323141000  | 1.296005000  | 2.332463000  |
| 1  | 0.328133000  | -0.393780000 | 3.474473000  |

**4Si(Me)-BH<sub>3</sub>, T. E.= -1509.61297**

|    |              |              |              |
|----|--------------|--------------|--------------|
| 6  | -3.427874000 | 0.661705000  | -0.098328000 |
| 7  | -2.514690000 | 0.816314000  | 0.874574000  |
| 14 | -1.655449000 | -0.822617000 | 0.375122000  |
| 7  | -3.269745000 | -0.576363000 | -0.587816000 |
| 14 | 1.659596000  | -0.792314000 | 0.444011000  |
| 7  | 2.464976000  | 0.892312000  | 0.827870000  |
| 6  | 3.416308000  | 0.672430000  | -0.095876000 |
| 7  | 3.326050000  | -0.619102000 | -0.449492000 |

|    |              |              |              |
|----|--------------|--------------|--------------|
| 6  | -2.102271000 | 2.075331000  | 1.462079000  |
| 1  | -1.596963000 | 1.877743000  | 2.417763000  |
| 1  | -1.403020000 | 2.613379000  | 0.798353000  |
| 1  | -2.968793000 | 2.723831000  | 1.670162000  |
| 6  | -3.957989000 | -1.187720000 | -1.705585000 |
| 1  | -3.268938000 | -1.894181000 | -2.190897000 |
| 1  | -4.853178000 | -1.747736000 | -1.383002000 |
| 1  | -4.257417000 | -0.444388000 | -2.460741000 |
| 6  | 4.007661000  | -1.289518000 | -1.536658000 |
| 1  | 4.958948000  | -0.792747000 | -1.780739000 |
| 1  | 4.230266000  | -2.328541000 | -1.252904000 |
| 1  | 3.379455000  | -1.307403000 | -2.443425000 |
| 6  | 1.976561000  | 2.195198000  | 1.238873000  |
| 1  | 1.328218000  | 2.635464000  | 0.461960000  |
| 1  | 1.392391000  | 2.081304000  | 2.162392000  |
| 1  | 2.808255000  | 2.885961000  | 1.452782000  |
| 6  | 4.339813000  | 1.699685000  | -0.664944000 |
| 1  | 3.827873000  | 2.221264000  | -1.489805000 |
| 1  | 4.612430000  | 2.444577000  | 0.094783000  |
| 1  | 5.256448000  | 1.243036000  | -1.059654000 |
| 6  | -4.376739000 | 1.701019000  | -0.603109000 |
| 1  | -3.890410000 | 2.281839000  | -1.403763000 |
| 1  | -5.285602000 | 1.242147000  | -1.013486000 |
| 1  | -4.660662000 | 2.398343000  | 0.196188000  |
| 14 | 0.030509000  | -0.818122000 | -1.170191000 |
| 6  | 1.965721000  | -1.899604000 | 1.966204000  |
| 1  | 1.817901000  | -2.957892000 | 1.704663000  |
| 1  | 2.988817000  | -1.766072000 | 2.347699000  |
| 1  | 1.259163000  | -1.656383000 | 2.774511000  |
| 6  | -2.025970000 | -2.043914000 | 1.792517000  |
| 1  | -1.883889000 | -3.078506000 | 1.446920000  |
| 1  | -1.341740000 | -1.881269000 | 2.639210000  |
| 1  | -3.058574000 | -1.926601000 | 2.153291000  |
| 5  | 0.133756000  | 1.138233000  | -1.955068000 |
| 1  | -0.431323000 | 1.950488000  | -1.225493000 |
| 1  | -0.388487000 | 1.075087000  | -3.059591000 |
| 1  | 1.337417000  | 1.379025000  | -2.054035000 |

**4Si(Cl)-BH<sub>3</sub>, T. E.= -2271.81138**

|    |              |              |              |
|----|--------------|--------------|--------------|
| 6  | -3.405545000 | -0.934712000 | 0.558531000  |
| 7  | -3.346412000 | -0.256492000 | -0.584526000 |
| 14 | -1.572552000 | 0.284529000  | -0.196773000 |
| 7  | -2.329245000 | -0.653020000 | 1.290630000  |
| 14 | 1.609484000  | 0.307638000  | -0.428462000 |
| 7  | 3.139364000  | -0.810511000 | -0.430441000 |

|    |              |              |              |
|----|--------------|--------------|--------------|
| 6  | 3.131446000  | -0.842184000 | 0.903219000  |
| 7  | 2.227098000  | 0.022640000  | 1.351621000  |
| 6  | -4.332485000 | -0.188317000 | -1.641398000 |
| 1  | -3.857943000 | -0.411902000 | -2.608484000 |
| 1  | -5.135127000 | -0.921578000 | -1.468219000 |
| 1  | -4.778871000 | 0.817322000  | -1.698400000 |
| 6  | -1.834578000 | -1.438348000 | 2.408815000  |
| 1  | -1.007021000 | -2.086114000 | 2.077444000  |
| 1  | -1.484097000 | -0.769741000 | 3.208795000  |
| 1  | -2.639764000 | -2.069962000 | 2.815463000  |
| 6  | 2.007973000  | 0.446477000  | 2.717116000  |
| 1  | 2.610299000  | -0.162246000 | 3.409210000  |
| 1  | 2.284030000  | 1.505208000  | 2.847338000  |
| 1  | 0.948339000  | 0.331053000  | 2.988153000  |
| 6  | 3.679871000  | -1.842693000 | -1.302513000 |
| 1  | 4.498471000  | -2.375218000 | -0.793826000 |
| 1  | 2.897489000  | -2.569450000 | -1.573895000 |
| 1  | 4.078184000  | -1.380712000 | -2.215838000 |
| 1  | 3.751300000  | -1.500464000 | 1.527367000  |
| 1  | -4.196455000 | -1.644065000 | 0.839008000  |
| 14 | -0.066540000 | -0.764823000 | -1.564104000 |
| 17 | 2.288473000  | 2.282027000  | -0.791628000 |
| 17 | -1.758343000 | 2.332805000  | 0.332686000  |
| 5  | 0.013376000  | -2.639046000 | -0.564422000 |
| 1  | 0.630963000  | -2.607446000 | 0.493386000  |
| 1  | 0.572866000  | -3.327480000 | -1.408381000 |
| 1  | -1.152985000 | -2.986570000 | -0.417858000 |

**4Si(NMe<sub>2</sub>)-BH<sub>3</sub>, T. E.= -1620.31187**

|    |              |              |              |
|----|--------------|--------------|--------------|
| 6  | 3.331846000  | -1.253788000 | 0.183999000  |
| 7  | 2.434252000  | -0.887462000 | 1.102636000  |
| 14 | 1.626980000  | 0.297810000  | -0.168272000 |
| 7  | 3.309831000  | -0.381561000 | -0.818862000 |
| 14 | -1.708850000 | 0.055695000  | -0.329044000 |
| 7  | -1.914546000 | -0.354486000 | 1.517481000  |
| 6  | -2.582233000 | -1.471868000 | 1.211338000  |
| 7  | -2.900253000 | -1.442347000 | -0.079822000 |
| 6  | 1.974821000  | -1.747286000 | 2.180018000  |
| 1  | 1.076836000  | -2.302637000 | 1.864220000  |
| 1  | 2.758162000  | -2.472880000 | 2.450377000  |
| 1  | 1.744424000  | -1.143752000 | 3.070169000  |
| 6  | 3.971608000  | -0.542160000 | -2.098442000 |
| 1  | 3.224556000  | -0.724118000 | -2.888639000 |
| 1  | 4.536960000  | 0.365906000  | -2.358410000 |
| 1  | 4.666593000  | -1.396117000 | -2.074625000 |

|    |              |              |              |
|----|--------------|--------------|--------------|
| 6  | -3.308101000 | -2.602010000 | -0.859292000 |
| 1  | -3.834060000 | -3.327526000 | -0.218356000 |
| 1  | -3.991518000 | -2.284814000 | -1.659308000 |
| 1  | -2.427047000 | -3.091889000 | -1.304784000 |
| 6  | -1.423080000 | 0.039030000  | 2.820367000  |
| 1  | -1.333456000 | -0.831496000 | 3.489946000  |
| 1  | -0.428275000 | 0.495441000  | 2.713792000  |
| 1  | -2.087028000 | 0.780275000  | 3.297812000  |
| 1  | -2.776299000 | -2.306349000 | 1.898781000  |
| 1  | 3.952133000  | -2.158619000 | 0.230959000  |
| 14 | 0.082808000  | -0.584218000 | -1.653737000 |
| 7  | 1.829852000  | 1.903544000  | 0.493539000  |
| 7  | -2.620994000 | 1.519396000  | -0.605231000 |
| 6  | 0.997247000  | 3.023313000  | 0.069609000  |
| 1  | 1.559203000  | 3.737881000  | -0.563508000 |
| 1  | 0.137502000  | 2.657129000  | -0.507568000 |
| 1  | 0.612040000  | 3.580445000  | 0.944434000  |
| 6  | 2.994305000  | 2.305003000  | 1.275561000  |
| 1  | 3.561520000  | 1.420566000  | 1.595734000  |
| 1  | 3.671407000  | 2.963370000  | 0.696215000  |
| 1  | 2.686270000  | 2.859701000  | 2.182186000  |
| 6  | -2.384713000 | 2.356002000  | -1.779145000 |
| 1  | -1.506231000 | 1.986039000  | -2.328681000 |
| 1  | -3.252628000 | 2.339375000  | -2.466676000 |
| 1  | -2.206796000 | 3.409094000  | -1.489038000 |
| 6  | -3.807175000 | 1.900262000  | 0.152106000  |
| 1  | -4.721819000 | 1.845352000  | -0.469892000 |
| 1  | -3.941468000 | 1.234268000  | 1.015265000  |
| 1  | -3.721817000 | 2.937670000  | 0.527797000  |
| 5  | 0.290263000  | -2.599388000 | -0.995944000 |
| 1  | 1.497758000  | -2.835032000 | -0.993578000 |
| 1  | -0.260354000 | -3.250703000 | -1.874685000 |
| 1  | -0.215145000 | -2.798235000 | 0.109630000  |

**4Si(PMe<sub>2</sub>)-BH<sub>3</sub>, T. E.= -2193.56933**

|    |              |              |              |
|----|--------------|--------------|--------------|
| 6  | 3.704464000  | -1.326957000 | 0.168874000  |
| 7  | 2.745816000  | -1.079354000 | 1.064218000  |
| 14 | 1.841683000  | 0.053586000  | -0.194386000 |
| 7  | 3.507890000  | -0.567848000 | -0.901395000 |
| 14 | -1.547991000 | -0.209876000 | -0.207078000 |
| 7  | -2.139479000 | -1.007640000 | 1.448507000  |
| 6  | -2.915245000 | -1.846601000 | 0.768569000  |
| 7  | -2.933572000 | -1.484812000 | -0.514811000 |
| 6  | 2.349818000  | -1.992338000 | 2.123122000  |
| 1  | 1.530099000  | -2.643726000 | 1.776875000  |



|    |              |              |              |
|----|--------------|--------------|--------------|
| 1  | 3.202518000  | -2.623677000 | 2.420313000  |
| 1  | 2.021195000  | -1.424339000 | 3.005543000  |
| 6  | 4.384583000  | -0.416542000 | -2.041841000 |
| 1  | 3.797817000  | -0.472135000 | -2.970755000 |
| 1  | 4.909986000  | 0.552643000  | -2.018867000 |
| 1  | 5.136217000  | -1.221520000 | -2.058385000 |
| 6  | -3.360044000 | -2.328128000 | -1.619938000 |
| 1  | -4.078003000 | -3.084570000 | -1.264956000 |
| 1  | -3.850346000 | -1.717942000 | -2.391293000 |
| 1  | -2.494173000 | -2.844550000 | -2.065196000 |
| 6  | -1.864774000 | -1.052434000 | 2.868225000  |
| 1  | -2.391817000 | -1.899282000 | 3.335783000  |
| 1  | -0.786374000 | -1.179836000 | 3.047882000  |
| 1  | -2.188392000 | -0.124102000 | 3.366076000  |
| 1  | -3.429761000 | -2.722164000 | 1.188555000  |
| 1  | 4.510675000  | -2.064907000 | 0.287595000  |
| 14 | 0.216067000  | -0.977215000 | -1.461021000 |
| 15 | 2.423926000  | 2.160216000  | 0.566768000  |
| 15 | -2.390932000 | 1.922706000  | -0.078134000 |
| 6  | 1.299307000  | 2.290770000  | 2.075932000  |
| 1  | 0.238336000  | 2.116992000  | 1.844036000  |
| 1  | 1.634068000  | 1.577266000  | 2.842161000  |
| 1  | 1.404762000  | 3.303732000  | 2.493310000  |
| 6  | 1.465562000  | 3.251656000  | -0.633243000 |
| 1  | 1.883541000  | 3.145310000  | -1.644203000 |
| 1  | 0.391255000  | 3.019569000  | -0.660009000 |
| 1  | 1.593112000  | 4.299741000  | -0.322416000 |
| 6  | -2.590024000 | 2.275607000  | -1.919354000 |
| 1  | -3.247852000 | 1.554172000  | -2.425630000 |
| 1  | -3.005471000 | 3.287040000  | -2.042297000 |
| 1  | -1.602982000 | 2.245678000  | -2.400737000 |
| 6  | -4.186688000 | 1.627682000  | 0.409764000  |
| 1  | -4.683457000 | 0.869915000  | -0.213268000 |
| 1  | -4.228185000 | 1.309232000  | 1.460572000  |
| 1  | -4.732761000 | 2.579078000  | 0.324001000  |
| 5  | 0.346145000  | -3.010914000 | -0.903226000 |
| 1  | -0.195170000 | -3.585562000 | -1.840253000 |
| 1  | -0.228718000 | -3.211580000 | 0.162373000  |
| 1  | 1.541256000  | -3.279393000 | -0.851698000 |

**5Ge(H)-BH<sub>3</sub>, T. E.= -2574.86466**

|    |              |              |             |
|----|--------------|--------------|-------------|
| 6  | -3.736313000 | -0.982205000 | 1.148115000 |
| 6  | -2.688255000 | -1.508249000 | 1.879205000 |
| 6  | -1.381822000 | -0.988003000 | 1.542202000 |
| 14 | -1.505376000 | 0.274182000  | 0.185250000 |

|    |              |              |              |
|----|--------------|--------------|--------------|
| 6  | -3.337391000 | -0.018620000 | 0.153404000  |
| 1  | -4.770633000 | -1.288917000 | 1.321358000  |
| 1  | -2.851930000 | -2.266768000 | 2.649646000  |
| 15 | -4.288163000 | 0.890474000  | -0.945788000 |
| 1  | -3.393479000 | 1.551289000  | -1.840421000 |
| 1  | -5.226668000 | 0.185188000  | -1.775713000 |
| 15 | 0.104528000  | -1.435696000 | 2.288283000  |
| 1  | 1.193424000  | -0.736230000 | 1.681929000  |
| 1  | 0.250491000  | -1.192589000 | 3.698242000  |
| 14 | -0.391867000 | 1.718820000  | -1.257726000 |
| 14 | 1.388099000  | 0.335325000  | -0.754780000 |
| 6  | 2.893499000  | 0.514000000  | 0.303342000  |
| 6  | 3.706106000  | -0.680646000 | 0.256473000  |
| 6  | 3.189181000  | -1.703517000 | -0.519480000 |
| 6  | 1.944532000  | -1.383983000 | -1.182171000 |
| 1  | 4.657797000  | -0.786433000 | 0.784326000  |
| 1  | 3.703301000  | -2.662248000 | -0.624300000 |
| 15 | 1.018408000  | -2.338962000 | -2.261977000 |
| 1  | 1.671048000  | -2.888911000 | -3.418552000 |
| 1  | 0.337717000  | -3.525747000 | -1.809509000 |
| 15 | 3.253011000  | 2.044024000  | 1.034294000  |
| 1  | 2.108966000  | 2.910208000  | 0.894184000  |
| 1  | 3.575108000  | 2.019268000  | 2.433707000  |
| 1  | -0.041979000 | -1.542723000 | -2.774338000 |
| 1  | 4.401128000  | 2.766814000  | 0.557584000  |
| 1  | -5.150136000 | 1.948468000  | -0.487865000 |
| 1  | 0.487816000  | -2.821603000 | 2.266090000  |
| 5  | 0.136754000  | 3.486563000  | -0.201979000 |
| 1  | -0.856895000 | 4.187407000  | -0.308235000 |
| 1  | 1.082817000  | 3.925177000  | -0.848491000 |
| 1  | 0.412358000  | 3.298696000  | 0.983133000  |

**5Si(Me)-BH<sub>3</sub>, T. E.= -3046.58932**

|    |              |              |              |
|----|--------------|--------------|--------------|
| 6  | 3.795051000  | -0.868896000 | 1.123694000  |
| 6  | 2.829105000  | -1.360926000 | 1.987098000  |
| 6  | 1.506137000  | -1.479219000 | 1.422814000  |
| 14 | 1.497838000  | -0.887842000 | -0.338079000 |
| 6  | 3.319343000  | -0.543805000 | -0.201321000 |
| 1  | 4.841967000  | -0.786375000 | 1.432863000  |
| 1  | 3.083027000  | -1.671191000 | 3.005581000  |
| 15 | 4.356156000  | 0.015921000  | -1.473287000 |
| 15 | 0.158125000  | -2.213140000 | 2.236782000  |
| 14 | 0.031758000  | -0.263097000 | -2.056958000 |
| 14 | -1.460385000 | 0.586636000  | -0.482318000 |
| 6  | -3.294960000 | 0.458653000  | -0.228841000 |

|    |              |              |              |
|----|--------------|--------------|--------------|
| 6  | -3.717335000 | 1.436308000  | 0.753791000  |
| 6  | -2.711750000 | 2.225101000  | 1.282359000  |
| 6  | -1.390885000 | 1.982769000  | 0.741457000  |
| 1  | -4.756168000 | 1.553707000  | 1.076369000  |
| 1  | -2.922374000 | 2.975563000  | 2.050190000  |
| 15 | 0.003273000  | 2.943560000  | 1.109147000  |
| 15 | -4.416268000 | -0.455977000 | -1.195843000 |
| 6  | 0.708334000  | -3.422109000 | 3.515882000  |
| 1  | 1.349016000  | -4.177456000 | 3.042248000  |
| 1  | 1.285197000  | -2.903454000 | 4.293502000  |
| 1  | -0.160578000 | -3.910661000 | 3.979051000  |
| 6  | -0.900570000 | -3.135426000 | 1.063513000  |
| 1  | -1.113682000 | -2.488003000 | 0.198162000  |
| 1  | -0.350858000 | -4.014383000 | 0.702048000  |
| 1  | -1.836853000 | -3.445539000 | 1.549213000  |
| 6  | -0.973267000 | -1.069176000 | 3.146895000  |
| 1  | -1.359568000 | -0.317543000 | 2.440662000  |
| 1  | -1.810810000 | -1.620264000 | 3.599734000  |
| 1  | -0.400451000 | -0.560465000 | 3.935081000  |
| 6  | 1.240491000  | 2.215860000  | 2.274438000  |
| 1  | 2.097839000  | 2.892005000  | 2.411245000  |
| 1  | 0.751230000  | 2.043637000  | 3.243300000  |
| 1  | 1.587144000  | 1.249001000  | 1.876471000  |
| 6  | 0.958617000  | 3.347854000  | -0.403983000 |
| 1  | 1.937957000  | 3.780013000  | -0.152611000 |
| 1  | 1.081553000  | 2.415199000  | -0.983870000 |
| 1  | 0.375556000  | 4.053539000  | -1.011106000 |
| 6  | -0.462068000 | 4.552053000  | 1.877482000  |
| 1  | 0.433230000  | 5.167127000  | 2.044467000  |
| 1  | -1.157326000 | 5.082497000  | 1.213765000  |
| 1  | -0.958140000 | 4.372020000  | 2.840806000  |
| 6  | -4.484609000 | 0.057557000  | -2.964613000 |
| 1  | -3.499754000 | -0.157290000 | -3.407031000 |
| 1  | -5.259477000 | -0.499614000 | -3.512550000 |
| 1  | -4.684679000 | 1.136190000  | -3.014690000 |
| 6  | -4.081135000 | -2.256857000 | -1.260963000 |
| 1  | -3.072867000 | -2.416514000 | -1.685002000 |
| 1  | -4.127338000 | -2.666976000 | -0.243216000 |
| 1  | -4.824226000 | -2.757190000 | -1.899873000 |
| 6  | -6.138624000 | -0.272983000 | -0.566397000 |
| 1  | -6.824985000 | -0.869311000 | -1.183331000 |
| 1  | -6.188145000 | -0.620114000 | 0.474256000  |
| 1  | -6.440309000 | 0.782125000  | -0.606738000 |
| 6  | 3.616102000  | -0.251199000 | -3.121102000 |
| 1  | 4.210527000  | 0.254095000  | -3.895910000 |
| 1  | 3.562051000  | -1.327764000 | -3.328427000 |

|   |              |              |              |
|---|--------------|--------------|--------------|
| 1 | 2.583019000  | 0.147196000  | -3.105602000 |
| 6 | 4.783039000  | 1.820073000  | -1.415961000 |
| 1 | 5.220091000  | 2.050688000  | -0.434653000 |
| 1 | 5.494568000  | 2.092017000  | -2.209813000 |
| 1 | 3.857356000  | 2.397909000  | -1.538067000 |
| 6 | 6.009896000  | -0.808092000 | -1.467771000 |
| 1 | 6.633220000  | -0.434542000 | -2.292951000 |
| 1 | 6.516762000  | -0.609215000 | -0.513494000 |
| 1 | 5.866393000  | -1.891578000 | -1.571693000 |
| 5 | -0.842198000 | -1.959312000 | -2.931739000 |
| 1 | -1.210202000 | -2.803217000 | -2.117992000 |
| 1 | 0.029816000  | -2.403260000 | -3.667774000 |
| 1 | -1.781441000 | -1.516497000 | -3.593773000 |

**6Ge-BH<sub>3</sub>, T. E.= -6791.89855**

|    |              |              |              |
|----|--------------|--------------|--------------|
| 32 | -0.000070000 | -0.399820000 | 1.142301000  |
| 32 | -1.880028000 | 0.152168000  | -0.477932000 |
| 32 | 1.880165000  | 0.151285000  | -0.477961000 |
| 7  | -3.173147000 | 1.492224000  | -0.024208000 |
| 7  | -3.385000000 | -1.014933000 | -0.355036000 |
| 7  | 3.172687000  | 1.492900000  | -0.027052000 |
| 7  | 3.385536000  | -1.014932000 | -0.352247000 |
| 6  | -4.447526000 | 1.007502000  | 0.034912000  |
| 1  | -5.295706000 | 1.678205000  | 0.180609000  |
| 6  | -4.560202000 | -0.359078000 | -0.135605000 |
| 1  | -5.506641000 | -0.901697000 | -0.124610000 |
| 6  | 4.560454000  | -0.358159000 | -0.133952000 |
| 1  | 5.507107000  | -0.900377000 | -0.121642000 |
| 6  | 4.447233000  | 1.008747000  | 0.033429000  |
| 1  | 5.295160000  | 1.680113000  | 0.177554000  |
| 6  | -2.907301000 | 2.917488000  | 0.134769000  |
| 6  | -3.360237000 | -2.460842000 | -0.582543000 |
| 6  | 3.361465000  | -2.461354000 | -0.576548000 |
| 6  | 2.906476000  | 2.918486000  | 0.128349000  |
| 1  | -3.720598000 | -2.711675000 | -1.593932000 |
| 1  | 3.316795000  | 3.507356000  | -0.709248000 |
| 1  | 2.334268000  | -2.830423000 | -0.457366000 |
| 1  | -3.314466000 | 3.507995000  | -0.703212000 |
| 1  | -2.333640000 | -2.830408000 | -0.459577000 |
| 1  | -3.997515000 | -2.970094000 | 0.157159000  |
| 1  | 1.820743000  | 3.081704000  | 0.169746000  |
| 1  | 3.343566000  | 3.292114000  | 1.068603000  |
| 1  | -3.347796000 | 3.289393000  | 1.074101000  |
| 1  | -1.821683000 | 3.080386000  | 0.180530000  |
| 1  | 3.726368000  | -2.714550000 | -1.585725000 |

|   |              |              |              |
|---|--------------|--------------|--------------|
| 1 | 3.995204000  | -2.969119000 | 0.167222000  |
| 5 | -0.000706000 | -2.519572000 | 1.038628000  |
| 1 | -1.016065000 | -2.757154000 | 1.685348000  |
| 1 | 1.013858000  | -2.757793000 | 1.686376000  |
| 1 | -0.000286000 | -3.055950000 | -0.057190000 |

**7Ge-BH<sub>3</sub>, T. E.= -8898.43588**

|    |              |              |              |
|----|--------------|--------------|--------------|
| 6  | -4.215011000 | 1.370681000  | 0.786448000  |
| 6  | -2.788417000 | 1.138065000  | 1.383520000  |
| 32 | -1.992855000 | -0.208957000 | 0.086897000  |
| 6  | -3.738050000 | -0.505431000 | -0.882565000 |
| 6  | -4.768775000 | 0.090665000  | 0.120116000  |
| 1  | -4.183491000 | 2.177138000  | 0.030915000  |
| 32 | 0.114914000  | -1.339543000 | -0.346516000 |
| 1  | -5.726847000 | 0.318693000  | -0.379092000 |
| 32 | 2.009639000  | 0.034709000  | 0.174328000  |
| 6  | 3.783090000  | -0.900401000 | 0.458324000  |
| 6  | 4.722561000  | -0.261500000 | -0.604146000 |
| 6  | 4.381305000  | 1.229685000  | -0.806555000 |
| 6  | 2.850326000  | 1.429453000  | -1.028099000 |
| 1  | 4.601513000  | -0.787451000 | -1.567626000 |
| 1  | 4.959705000  | 1.638243000  | -1.653893000 |
| 14 | -3.643596000 | 0.480716000  | -2.520909000 |
| 1  | -2.982316000 | 1.819670000  | -2.343971000 |
| 1  | -2.860650000 | -0.289252000 | -3.541945000 |
| 1  | -5.036501000 | 0.715795000  | -3.034237000 |
| 14 | -4.082398000 | -2.334373000 | -1.297659000 |
| 1  | -2.900926000 | -2.959717000 | -1.976243000 |
| 1  | -4.412023000 | -3.087330000 | -0.043084000 |
| 1  | -5.261326000 | -2.429785000 | -2.228522000 |
| 14 | -1.774216000 | 2.750839000  | 1.381643000  |
| 1  | -0.400430000 | 2.526996000  | 1.940320000  |
| 1  | -1.662336000 | 3.278787000  | -0.019883000 |
| 1  | -2.467627000 | 3.791217000  | 2.216474000  |
| 14 | -2.867723000 | 0.442758000  | 3.163217000  |
| 1  | -3.770387000 | -0.753539000 | 3.238874000  |
| 1  | -1.504651000 | 0.073962000  | 3.659009000  |
| 1  | -3.436687000 | 1.511015000  | 4.057991000  |
| 14 | 2.317132000  | 3.199199000  | -0.561912000 |
| 1  | 2.618459000  | 3.458619000  | 0.887087000  |
| 1  | 3.091523000  | 4.193601000  | -1.382177000 |
| 1  | 0.855419000  | 3.410314000  | -0.810189000 |
| 14 | 2.328892000  | 1.074064000  | -2.838542000 |
| 1  | 3.060958000  | 2.030450000  | -3.743448000 |
| 1  | 2.685504000  | -0.322186000 | -3.258459000 |

|    |              |              |              |
|----|--------------|--------------|--------------|
| 1  | 0.853928000  | 1.270707000  | -3.004868000 |
| 14 | 4.322934000  | -0.493483000 | 2.251540000  |
| 1  | 5.780602000  | -0.823143000 | 2.413978000  |
| 1  | 4.142183000  | 0.963267000  | 2.581178000  |
| 1  | 3.516662000  | -1.292454000 | 3.230718000  |
| 14 | 3.638204000  | -2.793602000 | 0.282419000  |
| 1  | 3.398783000  | -3.137654000 | -1.159884000 |
| 1  | 4.913514000  | -3.463940000 | 0.719611000  |
| 1  | 2.516717000  | -3.325717000 | 1.121982000  |
| 1  | 5.785053000  | -0.367281000 | -0.322649000 |
| 1  | 4.707831000  | 1.794826000  | 0.085807000  |
| 1  | -4.992974000 | -0.651863000 | 0.906082000  |
| 1  | -4.913447000 | 1.716200000  | 1.568734000  |
| 5  | -1.112732000 | -2.287023000 | 1.148252000  |
| 1  | -1.454162000 | -3.355433000 | 0.698108000  |
| 1  | -2.248272000 | -1.659081000 | 1.249745000  |
| 1  | -0.635352000 | -2.220192000 | 2.252219000  |

**8Ge-BH<sub>3</sub>, T. E.= -6946.65838**

|    |              |              |              |
|----|--------------|--------------|--------------|
| 6  | -3.537674000 | 2.059738000  | -0.661612000 |
| 7  | -2.233088000 | 1.520036000  | -0.508598000 |
| 32 | -1.828851000 | -0.238994000 | -0.057425000 |
| 7  | -3.540453000 | -0.945422000 | 0.059835000  |
| 6  | -4.658581000 | -0.152391000 | -0.146205000 |
| 6  | -4.672233000 | 1.168657000  | -0.455865000 |
| 32 | -0.034636000 | -1.742089000 | 0.747822000  |
| 1  | -5.612353000 | -0.680343000 | -0.043244000 |
| 1  | -5.652109000 | 1.629358000  | -0.583004000 |
| 32 | 1.694174000  | -0.056350000 | 0.157265000  |
| 7  | 3.273622000  | -0.354781000 | -0.753393000 |
| 6  | 4.448450000  | 0.436254000  | -0.678613000 |
| 6  | 4.436712000  | 1.574873000  | 0.234546000  |
| 6  | 3.441474000  | 1.983321000  | 1.061147000  |
| 7  | 2.197272000  | 1.383539000  | 1.218683000  |
| 1  | 5.351725000  | 2.167980000  | 0.247165000  |
| 1  | 3.602879000  | 2.866774000  | 1.687611000  |
| 6  | -3.744153000 | 3.366153000  | -0.997995000 |
| 1  | -4.765474000 | 3.726642000  | -1.111249000 |
| 1  | -2.945635000 | 4.083287000  | -1.166573000 |
| 6  | -1.121329000 | 2.423689000  | -0.784850000 |
| 1  | -1.189490000 | 2.826288000  | -1.809943000 |
| 1  | -1.112144000 | 3.272443000  | -0.079579000 |
| 1  | -0.167675000 | 1.882199000  | -0.691784000 |
| 6  | -3.758018000 | -2.354248000 | 0.406863000  |
| 1  | -4.481602000 | -2.810986000 | -0.287191000 |

|   |              |              |              |
|---|--------------|--------------|--------------|
| 1 | -2.817778000 | -2.915914000 | 0.316742000  |
| 1 | -4.135968000 | -2.460776000 | 1.437847000  |
| 6 | 3.277322000  | -1.475791000 | -1.699466000 |
| 1 | 4.067129000  | -2.197915000 | -1.434096000 |
| 1 | 2.309878000  | -1.995883000 | -1.669695000 |
| 1 | 3.463594000  | -1.117014000 | -2.725644000 |
| 6 | 1.294400000  | 1.943904000  | 2.226010000  |
| 1 | 1.788213000  | 1.975817000  | 3.211208000  |
| 1 | 0.969743000  | 2.964156000  | 1.959945000  |
| 1 | 0.403067000  | 1.306581000  | 2.317435000  |
| 6 | 5.556602000  | 0.163659000  | -1.424236000 |
| 1 | 6.433853000  | 0.800992000  | -1.322416000 |
| 1 | 5.624262000  | -0.667208000 | -2.121088000 |
| 5 | 0.069295000  | -3.340488000 | -0.681136000 |
| 1 | -0.860534000 | -4.020625000 | -0.272167000 |
| 1 | 1.154521000  | -3.782583000 | -0.333148000 |
| 1 | -0.015875000 | -3.003504000 | -1.840634000 |

**9Ge(H)-BH<sub>3</sub>, T. E.= -6715.64606**

|    |              |              |              |
|----|--------------|--------------|--------------|
| 6  | 3.865728000  | 0.566569000  | 0.005611000  |
| 7  | 2.866347000  | 1.393305000  | -0.276267000 |
| 32 | 1.613034000  | -0.173075000 | -0.675054000 |
| 7  | 3.535384000  | -0.696716000 | -0.228274000 |
| 32 | -1.620869000 | -0.210560000 | -0.665523000 |
| 7  | -2.886651000 | 1.380380000  | -0.372707000 |
| 6  | -3.874784000 | 0.568477000  | -0.022070000 |
| 7  | -3.533401000 | -0.705770000 | -0.164767000 |
| 6  | 2.737958000  | 2.756045000  | 0.207547000  |
| 1  | 2.034685000  | 2.799831000  | 1.055155000  |
| 1  | 3.716251000  | 3.142091000  | 0.539141000  |
| 1  | 2.363379000  | 3.409294000  | -0.594499000 |
| 6  | 4.421746000  | -1.839169000 | -0.199100000 |
| 1  | 3.946709000  | -2.669971000 | 0.343983000  |
| 1  | 4.665904000  | -2.190759000 | -1.216293000 |
| 1  | 5.364495000  | -1.587072000 | 0.314433000  |
| 6  | -4.389934000 | -1.856875000 | 0.014199000  |
| 1  | -5.325498000 | -1.570856000 | 0.522952000  |
| 1  | -4.650109000 | -2.323574000 | -0.951228000 |
| 1  | -3.880738000 | -2.612341000 | 0.631690000  |
| 6  | -2.794407000 | 2.791584000  | -0.053208000 |
| 1  | -3.776023000 | 3.183375000  | 0.261616000  |
| 1  | -2.072590000 | 2.957576000  | 0.763160000  |
| 1  | -2.462771000 | 3.361786000  | -0.934210000 |
| 1  | -4.851950000 | 0.907592000  | 0.356588000  |
| 1  | 4.842462000  | 0.887326000  | 0.400893000  |

|    |              |              |              |
|----|--------------|--------------|--------------|
| 32 | 0.007520000  | -0.882804000 | 1.011054000  |
| 1  | -1.683681000 | -0.361149000 | -2.228706000 |
| 1  | 1.665877000  | -0.228933000 | -2.244859000 |
| 5  | 0.050921000  | 0.668698000  | 2.547336000  |
| 1  | -0.853658000 | 0.294998000  | 3.275519000  |
| 1  | -0.117612000 | 1.773755000  | 2.062827000  |
| 1  | 1.160732000  | 0.491420000  | 3.026139000  |

**9Ge(Me)-BH<sub>3</sub>, T. E.= -6794.26138**

|    |              |              |              |
|----|--------------|--------------|--------------|
| 6  | 3.831399000  | 0.661611000  | -0.340960000 |
| 7  | 3.526947000  | -0.629673000 | -0.371967000 |
| 32 | 1.715361000  | -0.286550000 | 0.506708000  |
| 7  | 2.933516000  | 1.363327000  | 0.338413000  |
| 32 | -1.715409000 | -0.286743000 | 0.505928000  |
| 7  | -3.526739000 | -0.628499000 | -0.374054000 |
| 6  | -3.831428000 | 0.662673000  | -0.341172000 |
| 7  | -2.933681000 | 1.363594000  | 0.339166000  |
| 6  | 4.299911000  | -1.679447000 | -0.996796000 |
| 1  | 3.673005000  | -2.244169000 | -1.704862000 |
| 1  | 5.152704000  | -1.257431000 | -1.554296000 |
| 1  | 4.694394000  | -2.389300000 | -0.250023000 |
| 6  | 2.791453000  | 2.806848000  | 0.281489000  |
| 1  | 1.978099000  | 3.087795000  | -0.407626000 |
| 1  | 2.561729000  | 3.206187000  | 1.280882000  |
| 1  | 3.727896000  | 3.273869000  | -0.067768000 |
| 6  | -2.793330000 | 2.807367000  | 0.287083000  |
| 1  | -3.729679000 | 3.274428000  | -0.062396000 |
| 1  | -2.565823000 | 3.203964000  | 1.288098000  |
| 1  | -1.979113000 | 3.091585000  | -0.399687000 |
| 6  | -4.298794000 | -1.677089000 | -1.002022000 |
| 1  | -5.152917000 | -1.254240000 | -1.556847000 |
| 1  | -3.671957000 | -2.238299000 | -1.712964000 |
| 1  | -4.691293000 | -2.390232000 | -0.257380000 |
| 1  | -4.711973000 | 1.101411000  | -0.837525000 |
| 1  | 4.711782000  | 1.099791000  | -0.838070000 |
| 32 | 0.000537000  | -0.573825000 | -1.216077000 |
| 6  | -2.049305000 | -0.873111000 | 2.387772000  |
| 1  | -1.410536000 | -0.302801000 | 3.076779000  |
| 1  | -3.102650000 | -0.705810000 | 2.648699000  |
| 1  | -1.807751000 | -1.940386000 | 2.490543000  |
| 6  | 2.044740000  | -0.865168000 | 2.391778000  |
| 1  | 1.435841000  | -0.260471000 | 3.078697000  |
| 1  | 1.762100000  | -1.920476000 | 2.510950000  |
| 1  | 3.106128000  | -0.736212000 | 2.641649000  |
| 5  | 0.004100000  | 1.360580000  | -2.226871000 |



|   |              |             |              |
|---|--------------|-------------|--------------|
| 1 | -0.005504000 | 2.299242000 | -1.447799000 |
| 1 | -1.007668000 | 1.278575000 | -2.908571000 |
| 1 | 1.028842000  | 1.284478000 | -2.889932000 |

**9Ge(Cl)-BH<sub>3</sub>, T. E.= -7635.07805**

|    |              |              |              |
|----|--------------|--------------|--------------|
| 6  | -4.090388000 | -0.004534000 | -0.175791000 |
| 7  | -3.414458000 | 1.086528000  | -0.483794000 |
| 32 | -1.629527000 | 0.079363000  | -0.021314000 |
| 7  | -3.296020000 | -0.978748000 | 0.266208000  |
| 32 | 1.704400000  | 0.363585000  | -0.205153000 |
| 7  | 3.538640000  | -0.460026000 | -0.380211000 |
| 6  | 3.552811000  | -0.769924000 | 0.911990000  |
| 7  | 2.505919000  | -0.264436000 | 1.550659000  |
| 6  | -3.927663000 | 2.254092000  | -1.166440000 |
| 1  | -3.529019000 | 2.322087000  | -2.192313000 |
| 1  | -5.028635000 | 2.223155000  | -1.225611000 |
| 1  | -3.634597000 | 3.167051000  | -0.626389000 |
| 6  | -3.700619000 | -2.234329000 | 0.869590000  |
| 1  | -3.026112000 | -3.032963000 | 0.534355000  |
| 1  | -3.651141000 | -2.181463000 | 1.969640000  |
| 1  | -4.732952000 | -2.483630000 | 0.573342000  |
| 6  | 2.033770000  | -0.668481000 | 2.863426000  |
| 1  | 2.860618000  | -1.115167000 | 3.439971000  |
| 1  | 1.657115000  | 0.208151000  | 3.407112000  |
| 1  | 1.219818000  | -1.404410000 | 2.773817000  |
| 6  | 4.599878000  | -0.673715000 | -1.340273000 |
| 1  | 5.373123000  | -1.336193000 | -0.918280000 |
| 1  | 4.202615000  | -1.146423000 | -2.250774000 |
| 1  | 5.075107000  | 0.279526000  | -1.624963000 |
| 1  | 4.330025000  | -1.384838000 | 1.391216000  |
| 1  | -5.181548000 | -0.113194000 | -0.279946000 |
| 32 | 0.028343000  | -0.962621000 | -1.505084000 |
| 17 | 2.178093000  | 2.541379000  | -0.180358000 |
| 17 | -1.282164000 | 1.007634000  | 1.984966000  |
| 5  | -0.072332000 | -2.494037000 | 0.089447000  |
| 1  | 1.082733000  | -2.874145000 | 0.208479000  |
| 1  | -0.777743000 | -3.298620000 | -0.505471000 |
| 1  | -0.556761000 | -2.164347000 | 1.164818000  |

**9Ge(NMe<sub>2</sub>)-BH<sub>3</sub>, T. E.= -6983.55811**

|    |             |              |              |
|----|-------------|--------------|--------------|
| 6  | 3.628375000 | -1.192008000 | 0.423244000  |
| 7  | 2.723365000 | -0.823814000 | 1.327483000  |
| 32 | 1.711168000 | 0.290760000  | -0.060541000 |

|    |              |              |              |
|----|--------------|--------------|--------------|
| 7  | 3.544214000  | -0.473007000 | -0.683543000 |
| 32 | -1.803536000 | 0.145923000  | -0.185733000 |
| 7  | -2.224058000 | -0.252589000 | 1.761815000  |
| 6  | -2.936575000 | -1.329950000 | 1.421460000  |
| 7  | -3.216618000 | -1.344780000 | 0.130346000  |
| 6  | 2.356825000  | -1.622862000 | 2.484755000  |
| 1  | 1.507712000  | -2.285713000 | 2.248516000  |
| 1  | 3.208692000  | -2.243147000 | 2.810271000  |
| 1  | 2.079011000  | -0.962404000 | 3.319753000  |
| 6  | 4.359200000  | -0.640699000 | -1.867440000 |
| 1  | 3.725633000  | -0.868039000 | -2.739613000 |
| 1  | 4.926556000  | 0.277917000  | -2.090274000 |
| 1  | 5.076498000  | -1.468909000 | -1.740204000 |
| 6  | -3.789187000 | -2.472997000 | -0.580098000 |
| 1  | -4.338329000 | -3.132786000 | 0.112396000  |
| 1  | -4.491142000 | -2.117333000 | -1.348771000 |
| 1  | -2.995432000 | -3.064193000 | -1.065687000 |
| 6  | -1.594578000 | -0.052783000 | 3.052404000  |
| 1  | -2.174538000 | -0.550398000 | 3.847176000  |
| 1  | -0.567458000 | -0.454372000 | 3.072981000  |
| 1  | -1.548708000 | 1.021162000  | 3.284163000  |
| 1  | -3.231389000 | -2.117803000 | 2.131270000  |
| 1  | 4.344468000  | -2.014600000 | 0.575442000  |
| 32 | 0.047124000  | -0.865553000 | -1.503741000 |
| 7  | -2.702197000 | 1.737399000  | -0.489329000 |
| 7  | 1.990363000  | 2.019970000  | 0.552014000  |
| 6  | 1.178441000  | 3.119509000  | 0.050756000  |
| 1  | 1.723240000  | 3.744400000  | -0.685971000 |
| 1  | 0.270110000  | 2.733833000  | -0.435207000 |
| 1  | 0.860551000  | 3.780279000  | 0.879800000  |
| 6  | -3.886427000 | 2.159147000  | 0.242501000  |
| 1  | -4.802997000 | 2.086765000  | -0.377260000 |
| 1  | -4.022700000 | 1.533664000  | 1.135251000  |
| 1  | -3.791960000 | 3.211916000  | 0.572875000  |
| 6  | -2.430465000 | 2.515374000  | -1.690969000 |
| 1  | -3.285057000 | 2.494258000  | -2.396692000 |
| 1  | -2.229696000 | 3.575884000  | -1.443451000 |
| 1  | -1.551562000 | 2.110724000  | -2.216475000 |
| 6  | 3.206170000  | 2.436132000  | 1.233824000  |
| 1  | 3.888129000  | 3.001809000  | 0.566346000  |
| 1  | 2.966260000  | 3.090373000  | 2.094302000  |
| 1  | 3.744980000  | 1.558911000  | 1.617534000  |
| 5  | 0.094789000  | -2.725787000 | -0.366105000 |
| 1  | 1.254151000  | -3.107648000 | -0.482528000 |
| 1  | -0.668964000 | -3.417050000 | -1.030946000 |
| 1  | -0.258330000 | -2.620201000 | 0.801891000  |

**9Ge(PMe<sub>2</sub>)-BH<sub>3</sub>, T. E.= -7556.84772**

|    |              |              |              |
|----|--------------|--------------|--------------|
| 6  | -3.990155000 | -0.890851000 | 0.795572000  |
| 7  | -3.634706000 | -1.079298000 | -0.465986000 |
| 32 | -1.868141000 | -0.087410000 | -0.198093000 |
| 7  | -3.100755000 | -0.155780000 | 1.455649000  |
| 32 | 1.665584000  | -0.273388000 | -0.016451000 |
| 7  | 3.186130000  | 0.416247000  | -1.573756000 |
| 6  | 3.949828000  | -0.542935000 | -1.113214000 |
| 7  | 3.425796000  | -1.198020000 | -0.069407000 |
| 6  | -4.453248000 | -1.647533000 | -1.513835000 |
| 1  | -3.869142000 | -2.377641000 | -2.094215000 |
| 1  | -5.328160000 | -2.165475000 | -1.086233000 |
| 1  | -4.816381000 | -0.868182000 | -2.205085000 |
| 6  | -3.014782000 | -0.057873000 | 2.900392000  |
| 1  | -2.205733000 | -0.696960000 | 3.290994000  |
| 1  | -2.813063000 | 0.980436000  | 3.203577000  |
| 1  | -3.965065000 | -0.371197000 | 3.365355000  |
| 6  | 4.122189000  | -2.174746000 | 0.746121000  |
| 1  | 4.862240000  | -2.724577000 | 0.139969000  |
| 1  | 4.648421000  | -1.708128000 | 1.598078000  |
| 1  | 3.396495000  | -2.893295000 | 1.149137000  |
| 6  | 3.440820000  | 1.113737000  | -2.815489000 |
| 1  | 4.439732000  | 0.875284000  | -3.225966000 |
| 1  | 2.689040000  | 0.844921000  | -3.577245000 |
| 1  | 3.381904000  | 2.203285000  | -2.663570000 |
| 1  | 4.928412000  | -0.824674000 | -1.539964000 |
| 1  | -4.906001000 | -1.303783000 | 1.249340000  |
| 32 | -0.130575000 | -1.835933000 | -0.542868000 |
| 15 | 1.816017000  | 1.814475000  | 1.145849000  |
| 15 | -2.518035000 | 2.039175000  | -1.117258000 |
| 6  | -1.087610000 | 2.295370000  | -2.315952000 |
| 1  | -0.101268000 | 2.194188000  | -1.840131000 |
| 1  | -1.163365000 | 1.572270000  | -3.140231000 |
| 1  | -1.173201000 | 3.306434000  | -2.742968000 |
| 6  | 3.620874000  | 1.837862000  | 1.675723000  |
| 1  | 3.894758000  | 0.968964000  | 2.291504000  |
| 1  | 4.257832000  | 1.865477000  | 0.781674000  |
| 1  | 3.802631000  | 2.756303000  | 2.254833000  |
| 6  | 1.008092000  | 1.409066000  | 2.793148000  |
| 1  | 1.507681000  | 0.591053000  | 3.329843000  |
| 1  | 1.011971000  | 2.316996000  | 3.415959000  |
| 1  | -0.037399000 | 1.116412000  | 2.623141000  |
| 6  | -1.957822000 | 3.182264000  | 0.273331000  |
| 1  | -0.902550000 | 3.047365000  | 0.555787000  |
| 1  | -2.095673000 | 4.219517000  | -0.068707000 |

|   |              |              |             |
|---|--------------|--------------|-------------|
| 1 | -2.600202000 | 3.031091000  | 1.151940000 |
| 5 | 0.605171000  | -2.042905000 | 1.567723000 |
| 1 | 1.077518000  | -3.163959000 | 1.528619000 |
| 1 | -0.268656000 | -1.859065000 | 2.389109000 |
| 1 | 1.547453000  | -1.256102000 | 1.854892000 |

**10Ge(H)-BH<sub>3</sub>, T. E.= -7938.14110**

|    |              |              |              |
|----|--------------|--------------|--------------|
| 6  | 3.926399000  | 1.174930000  | 0.949969000  |
| 6  | 2.968405000  | 1.608229000  | 1.850723000  |
| 6  | 1.661187000  | 1.028921000  | 1.707299000  |
| 32 | 1.616138000  | -0.274155000 | 0.273900000  |
| 6  | 3.477298000  | 0.203334000  | -0.010934000 |
| 1  | 4.947767000  | 1.563469000  | 0.981730000  |
| 1  | 3.210128000  | 2.355413000  | 2.612033000  |
| 15 | 4.374717000  | -0.619867000 | -1.214100000 |
| 1  | 3.488081000  | -1.431693000 | -1.973918000 |
| 1  | 5.089574000  | 0.147127000  | -2.202137000 |
| 15 | 0.280665000  | 1.221409000  | 2.711342000  |
| 1  | -0.833646000 | 0.573107000  | 2.103280000  |
| 1  | 0.301157000  | 0.716244000  | 4.058750000  |
| 32 | 0.127930000  | -1.905804000 | -0.863393000 |
| 32 | -1.545052000 | -0.071284000 | -0.636368000 |
| 6  | -3.272878000 | -0.025777000 | 0.229792000  |
| 6  | -3.903039000 | 1.256906000  | 0.081650000  |
| 6  | -3.174188000 | 2.215724000  | -0.602358000 |
| 6  | -1.894193000 | 1.787060000  | -1.099741000 |
| 1  | -4.897901000 | 1.483906000  | 0.476282000  |
| 1  | -3.566831000 | 3.225799000  | -0.748908000 |
| 15 | -0.720391000 | 2.711851000  | -1.932961000 |
| 1  | -1.064362000 | 3.315633000  | -3.194909000 |
| 1  | -0.111741000 | 3.861196000  | -1.308980000 |
| 15 | -3.919618000 | -1.449166000 | 0.967990000  |
| 1  | -2.937766000 | -2.495813000 | 0.941315000  |
| 1  | -4.349970000 | -1.338956000 | 2.335075000  |
| 1  | 0.399346000  | 1.895878000  | -2.239952000 |
| 1  | -5.121317000 | -2.014444000 | 0.410507000  |
| 1  | 5.430551000  | -1.534962000 | -0.858001000 |
| 1  | -0.186259000 | 2.554408000  | 2.978399000  |
| 5  | -0.597166000 | -2.954396000 | 0.936474000  |
| 1  | 0.316240000  | -3.725520000 | 1.180180000  |
| 1  | -1.574805000 | -3.563413000 | 0.487986000  |
| 1  | -0.885456000 | -2.235009000 | 1.883979000  |

**10Ge(Me)-BH<sub>3</sub>, T. E.= -8409.86931**

|    |              |              |              |
|----|--------------|--------------|--------------|
| 6  | -3.974209000 | 1.500479000  | 0.892278000  |
| 6  | -2.982373000 | 2.306618000  | 1.434780000  |
| 6  | -1.639515000 | 2.027834000  | 1.010517000  |
| 32 | -1.603634000 | 0.485651000  | -0.177048000 |
| 6  | -3.538331000 | 0.458260000  | 0.004734000  |
| 1  | -5.023167000 | 1.648295000  | 1.169308000  |
| 1  | -3.232738000 | 3.087004000  | 2.160968000  |
| 15 | -4.620789000 | -0.522625000 | -0.937938000 |
| 15 | -0.248675000 | 2.966721000  | 1.435286000  |
| 32 | -0.067315000 | -0.183636000 | -2.026798000 |
| 32 | 1.685047000  | -0.934879000 | -0.359790000 |
| 6  | 3.478311000  | -0.220057000 | -0.084100000 |
| 6  | 3.949878000  | -0.514923000 | 1.241542000  |
| 6  | 3.059130000  | -1.185865000 | 2.070217000  |
| 6  | 1.787027000  | -1.518978000 | 1.494704000  |
| 1  | 4.964939000  | -0.288573000 | 1.587227000  |
| 1  | 3.356179000  | -1.480400000 | 3.082985000  |
| 15 | 0.553708000  | -2.452687000 | 2.279184000  |
| 15 | 4.458606000  | 0.475211000  | -1.328286000 |
| 6  | 0.714726000  | 3.471420000  | -0.046115000 |
| 1  | 0.905885000  | 2.566949000  | -0.648473000 |
| 1  | 0.103129000  | 4.159480000  | -0.645325000 |
| 1  | 1.661984000  | 3.952588000  | 0.238705000  |
| 6  | 0.984508000  | 2.142787000  | 2.533144000  |
| 1  | 1.321190000  | 1.204877000  | 2.063400000  |
| 1  | 1.852777000  | 2.795046000  | 2.710165000  |
| 1  | 0.498621000  | 1.906528000  | 3.489938000  |
| 6  | -0.699516000 | 4.528092000  | 2.305525000  |
| 1  | -1.210037000 | 4.290500000  | 3.248502000  |
| 1  | 0.203170000  | 5.116433000  | 2.522049000  |
| 1  | -1.377414000 | 5.114907000  | 1.671665000  |
| 6  | -4.156924000 | -2.293659000 | -0.976659000 |
| 1  | -4.869377000 | -2.857672000 | -1.596987000 |
| 1  | -3.147148000 | -2.389191000 | -1.415467000 |
| 1  | -4.158546000 | -2.687208000 | 0.048480000  |
| 6  | -4.738852000 | -0.039244000 | -2.714249000 |
| 1  | -4.984286000 | 1.029335000  | -2.777533000 |
| 1  | -3.753678000 | -0.220407000 | -3.170213000 |
| 1  | -5.499413000 | -0.635200000 | -3.240918000 |
| 6  | -6.349987000 | -0.436240000 | -0.301492000 |
| 1  | -6.372459000 | -0.764170000 | 0.746235000  |
| 1  | -6.713731000 | 0.598471000  | -0.360438000 |
| 1  | -7.004686000 | -1.082302000 | -0.902818000 |
| 6  | 4.880534000  | 2.262171000  | -1.069440000 |
| 1  | 5.348303000  | 2.377008000  | -0.081865000 |
| 1  | 5.565457000  | 2.633654000  | -1.845893000 |

|   |              |              |              |
|---|--------------|--------------|--------------|
| 1 | 3.949519000  | 2.844030000  | -1.088632000 |
| 6 | 6.116963000  | -0.322406000 | -1.538977000 |
| 1 | 6.686219000  | 0.153135000  | -2.351262000 |
| 1 | 6.685476000  | -0.242804000 | -0.601930000 |
| 1 | 5.962556000  | -1.385616000 | -1.765851000 |
| 6 | 3.633466000  | 0.392191000  | -2.957971000 |
| 1 | 2.589953000  | 0.742552000  | -2.856301000 |
| 1 | 4.173897000  | 1.012432000  | -3.687219000 |
| 1 | 3.609459000  | -0.649456000 | -3.303576000 |
| 6 | 1.241849000  | -3.700990000 | 3.453781000  |
| 1 | 1.921149000  | -4.368849000 | 2.907864000  |
| 1 | 1.806596000  | -3.190547000 | 4.245821000  |
| 1 | 0.431123000  | -4.286786000 | 3.910333000  |
| 6 | -0.651361000 | -1.496287000 | 3.304550000  |
| 1 | -1.400494000 | -2.159833000 | 3.761658000  |
| 1 | -0.100971000 | -0.964477000 | 4.093269000  |
| 1 | -1.150125000 | -0.761380000 | 2.653372000  |
| 6 | -0.449599000 | -3.380212000 | 1.061949000  |
| 1 | 0.172189000  | -4.165418000 | 0.612516000  |
| 1 | -1.325302000 | -3.827880000 | 1.553403000  |
| 1 | -0.774537000 | -2.702180000 | 0.256334000  |
| 5 | -0.974611000 | -1.988277000 | -2.784502000 |
| 1 | -1.254619000 | -2.817194000 | -1.922892000 |
| 1 | -0.155254000 | -2.426080000 | -3.581067000 |
| 1 | -1.976977000 | -1.571814000 | -3.366701000 |

**1Si-(BH<sub>3</sub>)<sub>2</sub>, T. E.= -1455.26103**

|    |              |              |              |
|----|--------------|--------------|--------------|
| 14 | 0.000243000  | -0.000606000 | 2.055826000  |
| 14 | 1.502844000  | -0.001135000 | 0.221660000  |
| 14 | -1.503589000 | 0.000956000  | 0.222581000  |
| 7  | 2.413451000  | -1.243904000 | -0.639405000 |
| 7  | 2.415596000  | 1.241586000  | -0.637180000 |
| 7  | -2.416103000 | -1.241174000 | -0.637365000 |
| 7  | -2.413199000 | 1.244317000  | -0.638708000 |
| 6  | 3.321796000  | -0.684766000 | -1.528353000 |
| 1  | 3.956740000  | -1.322721000 | -2.140636000 |
| 6  | 3.322991000  | 0.682497000  | -1.527115000 |
| 1  | 3.959085000  | 1.320439000  | -2.138217000 |
| 6  | -3.321182000 | 0.685771000  | -1.528406000 |
| 1  | -3.955551000 | 1.324130000  | -2.140866000 |
| 6  | -3.322785000 | -0.681485000 | -1.527660000 |
| 1  | -3.958673000 | -1.319023000 | -2.139399000 |
| 6  | 2.311658000  | -2.697835000 | -0.482437000 |
| 6  | 2.316413000  | 2.695373000  | -0.477292000 |
| 6  | -2.311388000 | 2.698150000  | -0.480903000 |

|   |              |              |              |
|---|--------------|--------------|--------------|
| 6 | -2.317735000 | -2.695055000 | -0.477773000 |
| 1 | 1.942821000  | 3.167095000  | -1.400165000 |
| 1 | -1.945444000 | -3.166848000 | -1.401134000 |
| 1 | -1.621414000 | 2.926262000  | 0.342457000  |
| 1 | 1.936407000  | -3.166966000 | -1.405959000 |
| 1 | 1.626932000  | 2.923489000  | 0.346484000  |
| 1 | 3.301602000  | 3.121788000  | -0.233251000 |
| 1 | -1.627499000 | -2.923766000 | 0.345202000  |
| 1 | -3.302934000 | -3.120883000 | -0.232736000 |
| 1 | 3.296262000  | -3.126575000 | -0.240119000 |
| 1 | 1.622477000  | -2.926406000 | 0.341460000  |
| 1 | -1.937092000 | 3.167871000  | -1.404509000 |
| 1 | -3.295768000 | 3.126698000  | -0.237317000 |
| 5 | 0.002563000  | 1.928215000  | 2.745294000  |
| 1 | 0.000584000  | 2.759925000  | 1.850998000  |
| 1 | 1.026837000  | 1.941756000  | 3.408975000  |
| 1 | -1.018677000 | 1.942025000  | 3.413647000  |
| 5 | -0.001110000 | -1.930054000 | 2.743627000  |
| 1 | -0.001177000 | -2.760911000 | 1.848536000  |
| 1 | -1.024047000 | -1.943975000 | 3.409343000  |
| 1 | 1.021449000  | -1.944896000 | 3.409921000  |

**2Si-(BH<sub>3</sub>)<sub>2</sub>, T. E.= -3561.77359**

|    |              |              |              |
|----|--------------|--------------|--------------|
| 6  | 3.974276000  | -0.348695000 | -1.267690000 |
| 6  | 2.762562000  | -1.273403000 | -0.924187000 |
| 14 | 1.665678000  | -0.157388000 | 0.155508000  |
| 6  | 3.035573000  | 1.106298000  | 0.599314000  |
| 6  | 4.338414000  | 0.489380000  | -0.027619000 |
| 1  | 3.703231000  | 0.327386000  | -2.098248000 |
| 14 | -0.131879000 | -0.934668000 | 1.418560000  |
| 1  | 5.074755000  | 1.269497000  | -0.287326000 |
| 14 | -1.880810000 | 0.090389000  | 0.345476000  |
| 6  | -3.662816000 | -0.584246000 | 0.143875000  |
| 6  | -4.318806000 | 0.450972000  | -0.827987000 |
| 6  | -3.267964000 | 0.976565000  | -1.832532000 |
| 6  | -1.969531000 | 1.424414000  | -1.062797000 |
| 1  | -4.726393000 | 1.301775000  | -0.254019000 |
| 1  | -3.686274000 | 1.806925000  | -2.426554000 |
| 14 | 2.754064000  | 2.869695000  | -0.083847000 |
| 1  | 2.936150000  | 2.879333000  | -1.575271000 |
| 1  | 1.381918000  | 3.371882000  | 0.241556000  |
| 1  | 3.774182000  | 3.793976000  | 0.517801000  |
| 14 | 3.200169000  | 1.275914000  | 2.510998000  |
| 1  | 2.130459000  | 2.162669000  | 3.065480000  |
| 1  | 3.145739000  | -0.071117000 | 3.166160000  |

|    |              |              |              |
|----|--------------|--------------|--------------|
| 1  | 4.544902000  | 1.886789000  | 2.786485000  |
| 14 | 1.964420000  | -2.060454000 | -2.468274000 |
| 1  | 0.610787000  | -2.617698000 | -2.160009000 |
| 1  | 1.851485000  | -1.013550000 | -3.541271000 |
| 1  | 2.845269000  | -3.160567000 | -2.989060000 |
| 14 | 3.327603000  | -2.756124000 | 0.199078000  |
| 1  | 3.402199000  | -2.375852000 | 1.646976000  |
| 1  | 2.406223000  | -3.917295000 | 0.026171000  |
| 1  | 4.710798000  | -3.108884000 | -0.272836000 |
| 14 | -0.440673000 | 1.348078000  | -2.166858000 |
| 1  | -0.541809000 | 0.239570000  | -3.168348000 |
| 1  | -0.083735000 | 2.635352000  | -2.851867000 |
| 1  | 0.795266000  | 0.999437000  | -1.291532000 |
| 14 | -2.193513000 | 3.204804000  | -0.382094000 |
| 1  | -2.529060000 | 4.102535000  | -1.540629000 |
| 1  | -3.317251000 | 3.267363000  | 0.607601000  |
| 1  | -0.937043000 | 3.696314000  | 0.263731000  |
| 14 | -3.548978000 | -2.323828000 | -0.665191000 |
| 1  | -4.928849000 | -2.712013000 | -1.121229000 |
| 1  | -2.663990000 | -2.294285000 | -1.881438000 |
| 1  | -3.021184000 | -3.332514000 | 0.301666000  |
| 14 | -4.629588000 | -0.729546000 | 1.786332000  |
| 1  | -4.857053000 | 0.649794000  | 2.336590000  |
| 1  | -5.971599000 | -1.354774000 | 1.523815000  |
| 1  | -3.888925000 | -1.563146000 | 2.782883000  |
| 1  | -5.169750000 | 0.007918000  | -1.373331000 |
| 1  | -3.024881000 | 0.172632000  | -2.548610000 |
| 1  | 4.839859000  | -0.162682000 | 0.710963000  |
| 1  | 4.846555000  | -0.932554000 | -1.606556000 |
| 5  | -0.135339000 | -2.912337000 | 1.986544000  |
| 1  | 0.805340000  | -2.992199000 | 2.754059000  |
| 1  | -0.059881000 | -3.603212000 | 0.991262000  |
| 1  | -1.226188000 | -2.935515000 | 2.536695000  |
| 5  | -1.009237000 | 0.757410000  | 2.313729000  |
| 1  | -1.511410000 | 0.407754000  | 3.354868000  |
| 1  | -0.379181000 | 1.786465000  | 2.282496000  |
| 1  | -2.118949000 | 1.133205000  | 1.691620000  |

**3Si-(BH<sub>3</sub>)<sub>2</sub>, T. E.= -1610.02884**

|    |              |              |              |
|----|--------------|--------------|--------------|
| 6  | -3.131969000 | 1.080557000  | -1.575506000 |
| 7  | -2.108919000 | 1.193081000  | -0.588248000 |
| 14 | -1.540300000 | -0.082117000 | 0.458283000  |
| 7  | -2.601753000 | -1.413911000 | 0.082416000  |
| 6  | -3.578885000 | -1.302430000 | -0.912876000 |
| 6  | -3.819909000 | -0.200649000 | -1.660444000 |



|    |              |              |              |
|----|--------------|--------------|--------------|
| 14 | 0.000040000  | -0.010507000 | 2.271914000  |
| 1  | -4.173598000 | -2.206654000 | -1.068305000 |
| 1  | -4.611467000 | -0.267586000 | -2.407005000 |
| 14 | 1.539332000  | 0.078523000  | 0.458266000  |
| 7  | 2.109293000  | -1.187879000 | -0.598100000 |
| 6  | 3.133468000  | -1.067151000 | -1.583216000 |
| 6  | 3.821187000  | 0.214876000  | -1.656861000 |
| 6  | 3.578709000  | 1.310617000  | -0.900957000 |
| 7  | 2.600110000  | 1.413961000  | 0.093809000  |
| 1  | 4.614020000  | 0.287905000  | -2.401501000 |
| 1  | 4.173551000  | 2.216130000  | -1.048159000 |
| 6  | -3.468665000 | 2.109124000  | -2.399707000 |
| 1  | -4.267575000 | 1.964187000  | -3.125355000 |
| 1  | -2.986995000 | 3.082727000  | -2.380977000 |
| 6  | -1.464355000 | 2.507866000  | -0.465789000 |
| 1  | -0.917524000 | 2.763798000  | -1.388201000 |
| 1  | -2.226575000 | 3.281395000  | -0.280961000 |
| 1  | -0.776038000 | 2.504611000  | 0.390217000  |
| 6  | -2.544139000 | -2.697091000 | 0.806555000  |
| 1  | -2.326528000 | -3.521781000 | 0.109410000  |
| 1  | -1.757514000 | -2.661691000 | 1.571421000  |
| 1  | -3.505737000 | -2.893395000 | 1.305797000  |
| 6  | 1.465007000  | -2.503804000 | -0.486778000 |
| 1  | 2.227142000  | -3.278561000 | -0.306877000 |
| 1  | 0.775323000  | -2.507412000 | 0.368126000  |
| 1  | 0.919536000  | -2.752606000 | -1.411950000 |
| 6  | 2.540292000  | 2.691909000  | 0.827001000  |
| 1  | 3.501300000  | 2.885916000  | 1.328231000  |
| 1  | 2.322008000  | 3.521188000  | 0.135530000  |
| 1  | 1.753318000  | 2.649863000  | 1.591174000  |
| 6  | 3.471335000  | -2.088909000 | -2.415330000 |
| 1  | 4.271000000  | -1.937989000 | -3.138932000 |
| 1  | 2.989878000  | -3.062740000 | -2.404973000 |
| 5  | 0.133759000  | -1.858633000 | 3.140248000  |
| 1  | -0.934904000 | -1.888405000 | 3.730495000  |
| 1  | 1.080420000  | -1.611682000 | 3.870449000  |
| 1  | 0.323024000  | -2.799569000 | 2.396509000  |
| 5  | -0.132291000 | 1.829690000  | 3.157062000  |
| 1  | 0.938257000  | 1.856662000  | 3.743938000  |
| 1  | -0.326507000 | 2.776818000  | 2.422420000  |
| 1  | -1.075722000 | 1.574744000  | 3.888757000  |

**4Si(H)- (BH<sub>3</sub>)<sub>2</sub>, T. E.= -1379.00961**

|   |             |             |              |
|---|-------------|-------------|--------------|
| 6 | 3.749644000 | 0.606418000 | 0.064980000  |
| 7 | 2.815672000 | 1.417156000 | -0.383750000 |

|    |              |              |              |
|----|--------------|--------------|--------------|
| 14 | 1.658368000  | -0.225287000 | -0.710093000 |
| 7  | 3.347951000  | -0.666670000 | -0.073010000 |
| 14 | -1.695025000 | -0.082400000 | -0.757196000 |
| 7  | -2.881242000 | 1.334627000  | -0.332927000 |
| 6  | -3.817076000 | 0.450145000  | 0.021055000  |
| 7  | -3.394409000 | -0.772365000 | -0.289326000 |
| 6  | 2.759612000  | 2.845734000  | -0.154405000 |
| 1  | 1.998617000  | 3.086138000  | 0.606111000  |
| 1  | 3.731032000  | 3.233530000  | 0.195132000  |
| 1  | 2.492873000  | 3.369572000  | -1.084985000 |
| 6  | 4.140860000  | -1.860345000 | 0.156117000  |
| 1  | 3.512005000  | -2.632383000 | 0.617984000  |
| 1  | 4.549830000  | -2.264377000 | -0.785061000 |
| 1  | 4.977498000  | -1.632490000 | 0.835148000  |
| 6  | -4.088247000 | -2.028397000 | -0.083187000 |
| 1  | -5.039943000 | -1.856420000 | 0.442587000  |
| 1  | -4.299821000 | -2.521403000 | -1.044653000 |
| 1  | -3.468780000 | -2.704279000 | 0.523876000  |
| 6  | -2.804466000 | 2.718569000  | 0.103916000  |
| 1  | -3.797069000 | 3.071924000  | 0.423277000  |
| 1  | -2.104161000 | 2.821551000  | 0.948477000  |
| 1  | -2.460526000 | 3.354692000  | -0.723959000 |
| 1  | -4.767283000 | 0.690615000  | 0.518002000  |
| 1  | 4.706875000  | 0.901898000  | 0.518596000  |
| 14 | -0.060856000 | -0.646055000 | 0.758289000  |
| 1  | -1.657716000 | -0.150572000 | -2.261357000 |
| 1  | 1.597911000  | -0.138727000 | -2.205675000 |
| 5  | -0.315580000 | 0.111481000  | 2.642197000  |
| 1  | -1.330095000 | -0.431889000 | 3.054211000  |
| 1  | -0.432162000 | 1.322230000  | 2.514849000  |
| 1  | 0.684747000  | -0.218897000 | 3.256871000  |
| 5  | 0.570886000  | -2.392210000 | -0.257983000 |
| 1  | -0.253456000 | -2.923798000 | -0.974416000 |
| 1  | 1.070901000  | -3.106062000 | 0.588944000  |
| 1  | 1.519616000  | -2.096794000 | -1.056803000 |

**4Si(Me)-(BH<sub>3</sub>)<sub>2</sub>, T. E.= -1536.24823**

|    |              |              |              |
|----|--------------|--------------|--------------|
| 6  | -3.583843000 | 0.626744000  | -0.289398000 |
| 7  | -2.866666000 | 1.044109000  | 0.772666000  |
| 14 | -1.855745000 | -0.548470000 | 0.722798000  |
| 7  | -3.299675000 | -0.675019000 | -0.462183000 |
| 14 | 1.778272000  | -0.283370000 | 0.739337000  |
| 7  | 2.825208000  | 1.274514000  | 0.496937000  |
| 6  | 3.651644000  | 0.603100000  | -0.330414000 |
| 7  | 3.309079000  | -0.691493000 | -0.254837000 |

|    |              |              |              |
|----|--------------|--------------|--------------|
| 6  | -2.638082000 | 2.428055000  | 1.149006000  |
| 1  | -2.215472000 | 2.456407000  | 2.162542000  |
| 1  | -1.933992000 | 2.923105000  | 0.458324000  |
| 1  | -3.582351000 | 2.995005000  | 1.166415000  |
| 6  | -3.682319000 | -1.496053000 | -1.601266000 |
| 1  | -3.165116000 | -2.459761000 | -1.519081000 |
| 1  | -4.769297000 | -1.680685000 | -1.612873000 |
| 1  | -3.377642000 | -1.031663000 | -2.553009000 |
| 6  | 3.875722000  | -1.829502000 | -0.957308000 |
| 1  | 4.374143000  | -1.517762000 | -1.887214000 |
| 1  | 4.602195000  | -2.368663000 | -0.326235000 |
| 1  | 3.056768000  | -2.514396000 | -1.217916000 |
| 6  | 2.560270000  | 2.703765000  | 0.460276000  |
| 1  | 1.760036000  | 2.938790000  | -0.261855000 |
| 1  | 2.245993000  | 3.041783000  | 1.457911000  |
| 1  | 3.466294000  | 3.265302000  | 0.185110000  |
| 6  | 4.689066000  | 1.200204000  | -1.224278000 |
| 1  | 4.215994000  | 1.557998000  | -2.153172000 |
| 1  | 5.178982000  | 2.056143000  | -0.740483000 |
| 1  | 5.453703000  | 0.459769000  | -1.490023000 |
| 6  | -4.437451000 | 1.467544000  | -1.176807000 |
| 1  | -3.807495000 | 1.868825000  | -1.988357000 |
| 1  | -5.242583000 | 0.873071000  | -1.628274000 |
| 1  | -4.875007000 | 2.312353000  | -0.628921000 |
| 14 | -0.018589000 | -0.563654000 | -0.707737000 |
| 6  | 2.011084000  | -0.907127000 | 2.515208000  |
| 1  | 1.704806000  | -1.962420000 | 2.569076000  |
| 1  | 3.057073000  | -0.818795000 | 2.843211000  |
| 1  | 1.374616000  | -0.334857000 | 3.207559000  |
| 6  | -2.198778000 | -1.577590000 | 2.275659000  |
| 1  | -1.883129000 | -2.615169000 | 2.087935000  |
| 1  | -1.609973000 | -1.200918000 | 3.126421000  |
| 1  | -3.264192000 | -1.564017000 | 2.546822000  |
| 5  | -0.277073000 | 1.038699000  | -1.967751000 |
| 1  | -0.358442000 | 2.059208000  | -1.285771000 |
| 1  | -1.319557000 | 0.821751000  | -2.582099000 |
| 1  | 0.682223000  | 1.070415000  | -2.728671000 |
| 5  | 0.197572000  | -2.645186000 | -0.828450000 |
| 1  | -0.917396000 | -3.155886000 | -0.869237000 |
| 1  | 0.814602000  | -3.051024000 | 0.156954000  |
| 1  | 0.817045000  | -2.834185000 | -1.867788000 |

**4Si(Cl)-(BH<sub>3</sub>)<sub>2</sub>, T. E.= -2298.44206**

|   |              |              |              |
|---|--------------|--------------|--------------|
| 6 | -3.682692000 | -0.694884000 | 0.362968000  |
| 7 | -2.855232000 | -1.171212000 | -0.570806000 |

|    |              |              |              |
|----|--------------|--------------|--------------|
| 14 | -1.704804000 | 0.286620000  | -0.254061000 |
| 7  | -3.309221000 | 0.545034000  | 0.680829000  |
| 14 | 1.704873000  | -0.285356000 | -0.256395000 |
| 7  | 3.309569000  | -0.550734000 | 0.676342000  |
| 6  | 3.682523000  | 0.691741000  | 0.367715000  |
| 7  | 2.855380000  | 1.174523000  | -0.562856000 |
| 6  | -2.735591000 | -2.562441000 | -0.983235000 |
| 1  | -1.966697000 | -3.077140000 | -0.385705000 |
| 1  | -3.699334000 | -3.076810000 | -0.849941000 |
| 1  | -2.460184000 | -2.605431000 | -2.045462000 |
| 6  | -3.867871000 | 1.413082000  | 1.702769000  |
| 1  | -3.085766000 | 1.688798000  | 2.424799000  |
| 1  | -4.266458000 | 2.332597000  | 1.248260000  |
| 1  | -4.679563000 | 0.897691000  | 2.237620000  |
| 6  | 2.738043000  | 2.567861000  | -0.968308000 |
| 1  | 3.697842000  | 3.084317000  | -0.816056000 |
| 1  | 2.479066000  | 2.617631000  | -2.034433000 |
| 1  | 1.958793000  | 3.076153000  | -0.378830000 |
| 6  | 3.864965000  | -1.423140000 | 1.696471000  |
| 1  | 4.682833000  | -0.914089000 | 2.227962000  |
| 1  | 3.083627000  | -1.693140000 | 2.421552000  |
| 1  | 4.254670000  | -2.345514000 | 1.240208000  |
| 1  | 4.505601000  | 1.246293000  | 0.837498000  |
| 1  | -4.506243000 | -1.252413000 | 0.828361000  |
| 14 | 0.000230000  | -0.004129000 | 1.329864000  |
| 17 | 1.768684000  | -1.494145000 | -1.985638000 |
| 17 | -1.769588000 | 1.507443000  | -1.974789000 |
| 5  | 0.409716000  | 1.864266000  | 2.086202000  |
| 1  | 0.316772000  | 2.724588000  | 1.224467000  |
| 1  | 1.546285000  | 1.755360000  | 2.536356000  |
| 1  | -0.414534000 | 1.990830000  | 2.981341000  |
| 5  | -0.408191000 | -1.876632000 | 2.076534000  |
| 1  | -0.316723000 | -2.732412000 | 1.210156000  |
| 1  | -1.543880000 | -1.770060000 | 2.529395000  |
| 1  | 0.417709000  | -2.007960000 | 2.969493000  |

**4Si(NMe<sub>2</sub>)-(BH<sub>3</sub>)<sub>2</sub>, T. E.= -1646.94638**

|    |              |              |              |
|----|--------------|--------------|--------------|
| 6  | -3.476840000 | -1.296822000 | 0.002864000  |
| 7  | -2.658148000 | -1.114014000 | -1.042954000 |
| 14 | -1.756227000 | 0.251723000  | -0.079392000 |
| 7  | -3.350233000 | -0.272497000 | 0.836582000  |
| 14 | 1.869534000  | 0.114277000  | 0.146379000  |
| 7  | 2.082962000  | -0.598634000 | -1.596062000 |
| 6  | 2.745198000  | -1.645914000 | -1.091107000 |
| 7  | 3.072727000  | -1.380819000 | 0.169067000  |

|    |              |              |              |
|----|--------------|--------------|--------------|
| 6  | -2.269969000 | -2.169350000 | -1.968232000 |
| 1  | -1.402099000 | -2.726102000 | -1.578679000 |
| 1  | -3.105359000 | -2.871620000 | -2.115371000 |
| 1  | -2.019481000 | -1.728942000 | -2.943811000 |
| 6  | -3.985811000 | -0.117013000 | 2.134320000  |
| 1  | -3.211045000 | 0.020287000  | 2.903527000  |
| 1  | -4.645657000 | 0.764684000  | 2.138013000  |
| 1  | -4.581452000 | -1.009227000 | 2.381457000  |
| 6  | 3.526657000  | -2.365077000 | 1.142583000  |
| 1  | 4.098159000  | -3.161104000 | 0.640294000  |
| 1  | 4.179628000  | -1.876360000 | 1.878236000  |
| 1  | 2.665924000  | -2.815720000 | 1.662261000  |
| 6  | 1.508983000  | -0.498518000 | -2.922640000 |
| 1  | 1.528835000  | -1.474810000 | -3.431247000 |
| 1  | 0.462020000  | -0.168512000 | -2.852621000 |
| 1  | 2.057094000  | 0.231097000  | -3.541081000 |
| 1  | 2.935827000  | -2.590234000 | -1.617831000 |
| 1  | -4.109752000 | -2.179345000 | 0.163826000  |
| 14 | -0.053579000 | -0.492559000 | 1.380145000  |
| 7  | -1.955008000 | 1.737902000  | -0.957658000 |
| 7  | 2.738503000  | 1.605753000  | 0.273402000  |
| 6  | -1.045730000 | 2.866829000  | -0.770830000 |
| 1  | -1.531821000 | 3.693666000  | -0.220247000 |
| 1  | -0.163658000 | 2.552788000  | -0.195847000 |
| 1  | -0.704104000 | 3.259583000  | -1.746315000 |
| 6  | -3.166923000 | 2.075035000  | -1.700694000 |
| 1  | -3.794285000 | 1.182884000  | -1.832483000 |
| 1  | -3.762495000 | 2.848530000  | -1.179198000 |
| 1  | -2.912644000 | 2.466121000  | -2.703219000 |
| 6  | 2.345769000  | 2.652569000  | 1.221242000  |
| 1  | 1.422826000  | 2.371122000  | 1.749493000  |
| 1  | 3.132815000  | 2.809851000  | 1.981296000  |
| 1  | 2.183447000  | 3.613110000  | 0.697463000  |
| 6  | 4.000753000  | 1.867887000  | -0.411546000 |
| 1  | 4.834791000  | 1.965297000  | 0.308751000  |
| 1  | 4.241797000  | 1.050789000  | -1.105857000 |
| 1  | 3.946377000  | 2.807941000  | -0.991578000 |
| 5  | -0.146119000 | -2.527312000 | 1.051173000  |
| 1  | -1.334109000 | -2.839160000 | 1.103750000  |
| 1  | 0.469748000  | -3.046693000 | 1.971967000  |
| 1  | 0.338649000  | -2.805465000 | -0.047298000 |
| 5  | -0.228984000 | 0.686064000  | 3.062917000  |
| 1  | -0.460310000 | 1.850673000  | 2.763513000  |
| 1  | 0.828843000  | 0.554129000  | 3.663342000  |
| 1  | -1.157313000 | 0.167241000  | 3.672790000  |

**4Si(PMe<sub>2</sub>)-(BH<sub>3</sub>)<sub>2</sub>, T. E.= -2220.20054**

|    |              |              |              |
|----|--------------|--------------|--------------|
| 6  | 3.896929000  | -1.229009000 | -0.120794000 |
| 7  | 3.126735000  | -1.102865000 | 0.963253000  |
| 14 | 1.969564000  | 0.057922000  | 0.000951000  |
| 7  | 3.458784000  | -0.399119000 | -1.063041000 |
| 14 | -1.731995000 | -0.175530000 | -0.013174000 |
| 7  | -2.340343000 | -1.033864000 | 1.560702000  |
| 6  | -3.054408000 | -1.885780000 | 0.817491000  |
| 7  | -3.069622000 | -1.453810000 | -0.441567000 |
| 6  | 3.055642000  | -2.052107000 | 2.061591000  |
| 1  | 2.204396000  | -2.736822000 | 1.918610000  |
| 1  | 3.983803000  | -2.642936000 | 2.110008000  |
| 1  | 2.938927000  | -1.517981000 | 3.015614000  |
| 6  | 4.002159000  | -0.191367000 | -2.392281000 |
| 1  | 3.190270000  | -0.272239000 | -3.129674000 |
| 1  | 4.464851000  | 0.804760000  | -2.477139000 |
| 1  | 4.765023000  | -0.954045000 | -2.612573000 |
| 6  | -3.550071000 | -2.194701000 | -1.595997000 |
| 1  | -4.268418000 | -2.965771000 | -1.276832000 |
| 1  | -4.050584000 | -1.514623000 | -2.298562000 |
| 1  | -2.710908000 | -2.683561000 | -2.114477000 |
| 6  | -1.894881000 | -1.272098000 | 2.921091000  |
| 1  | -2.601431000 | -1.936842000 | 3.442043000  |
| 1  | -0.899692000 | -1.745942000 | 2.928481000  |
| 1  | -1.845535000 | -0.322274000 | 3.471544000  |
| 1  | -3.516844000 | -2.813636000 | 1.179250000  |
| 1  | 4.736163000  | -1.930335000 | -0.227922000 |
| 14 | 0.181826000  | -1.086173000 | -1.029643000 |
| 15 | 2.527368000  | 2.134115000  | 0.847565000  |
| 15 | -2.531364000 | 1.962378000  | 0.084148000  |
| 6  | 1.386827000  | 2.140926000  | 2.351935000  |
| 1  | 0.333279000  | 1.947654000  | 2.100783000  |
| 1  | 1.733650000  | 1.399596000  | 3.085949000  |
| 1  | 1.454181000  | 3.132604000  | 2.823898000  |
| 6  | 1.527177000  | 3.240157000  | -0.303543000 |
| 1  | 1.938467000  | 3.188820000  | -1.321029000 |
| 1  | 0.460735000  | 2.976667000  | -0.336155000 |
| 1  | 1.625383000  | 4.277044000  | 0.051462000  |
| 6  | -2.527300000 | 2.381600000  | -1.751389000 |
| 1  | -3.230640000 | 1.765549000  | -2.328463000 |
| 1  | -2.799402000 | 3.440640000  | -1.867622000 |
| 1  | -1.520374000 | 2.228235000  | -2.164841000 |
| 6  | -4.369074000 | 1.712056000  | 0.408994000  |
| 1  | -4.847745000 | 1.045995000  | -0.322534000 |
| 1  | -4.502799000 | 1.295423000  | 1.416757000  |

|   |              |              |              |
|---|--------------|--------------|--------------|
| 1 | -4.865527000 | 2.693440000  | 0.378802000  |
| 5 | 0.218941000  | -3.004303000 | -0.281241000 |
| 1 | -0.650866000 | -3.599223000 | -0.907586000 |
| 1 | -0.005985000 | -2.991738000 | 0.926615000  |
| 1 | 1.330795000  | -3.451135000 | -0.538517000 |
| 5 | 0.150252000  | -0.249773000 | -2.928211000 |
| 1 | 0.415448000  | 0.945439000  | -2.887344000 |
| 1 | -0.975679000 | -0.455852000 | -3.364968000 |
| 1 | 0.992612000  | -0.901459000 | -3.533891000 |

**5Si(H)-(BH<sub>3</sub>)<sub>2</sub>, T. E.= -2601.50636**

|    |              |              |              |
|----|--------------|--------------|--------------|
| 6  | -3.785767000 | -1.211675000 | -1.106820000 |
| 6  | -2.816487000 | -2.110274000 | -1.514036000 |
| 6  | -1.517996000 | -1.916764000 | -0.909746000 |
| 14 | -1.568135000 | -0.496610000 | 0.269128000  |
| 6  | -3.335783000 | -0.231767000 | -0.150087000 |
| 1  | -4.805251000 | -1.251130000 | -1.499015000 |
| 1  | -3.027456000 | -2.891007000 | -2.249288000 |
| 15 | -4.236123000 | 1.056446000  | 0.571726000  |
| 1  | -3.362077000 | 1.868235000  | 1.369639000  |
| 1  | -4.903738000 | 1.960531000  | -0.320209000 |
| 15 | -0.089090000 | -2.815252000 | -1.238457000 |
| 1  | 1.050111000  | -2.145436000 | -0.695263000 |
| 1  | 0.037953000  | -4.164509000 | -0.753351000 |
| 14 | -0.225594000 | 0.711086000  | 1.792778000  |
| 14 | 1.525064000  | 0.624798000  | 0.237008000  |
| 6  | 3.037965000  | -0.416937000 | 0.111295000  |
| 6  | 3.797332000  | -0.045052000 | -1.060156000 |
| 6  | 3.225741000  | 0.953024000  | -1.833964000 |
| 6  | 1.978753000  | 1.470149000  | -1.328079000 |
| 1  | 4.753495000  | -0.501604000 | -1.329342000 |
| 1  | 3.703401000  | 1.312902000  | -2.748934000 |
| 15 | 1.002225000  | 2.775771000  | -1.894957000 |
| 1  | 1.630725000  | 4.054216000  | -2.062532000 |
| 1  | 0.368674000  | 2.658913000  | -3.179580000 |
| 15 | 3.555007000  | -1.338031000 | 1.488369000  |
| 1  | 2.462747000  | -1.423113000 | 2.425108000  |
| 1  | 3.990348000  | -2.683350000 | 1.238852000  |
| 1  | -0.065522000 | 2.993777000  | -0.967795000 |
| 1  | 4.696324000  | -0.859105000 | 2.214026000  |
| 1  | -5.343005000 | 0.711766000  | 1.419577000  |
| 1  | 0.237650000  | -3.038577000 | -2.617359000 |
| 5  | 0.458193000  | -0.480336000 | 3.331747000  |
| 1  | -0.447824000 | -0.583834000 | 4.140431000  |
| 1  | 1.428908000  | 0.118141000  | 3.784731000  |

|   |              |              |             |
|---|--------------|--------------|-------------|
| 1 | 0.764047000  | -1.590454000 | 2.882310000 |
| 5 | -1.026267000 | 2.616287000  | 1.624804000 |
| 1 | -0.198191000 | 3.391257000  | 2.074306000 |
| 1 | -1.300855000 | 2.868094000  | 0.445459000 |
| 1 | -2.051605000 | 2.636450000  | 2.310023000 |

**5Si(Me)-(BH<sub>3</sub>)<sub>2</sub>, T. E.= -3073.23482**

|    |              |              |              |
|----|--------------|--------------|--------------|
| 6  | 4.098409000  | -1.068664000 | 0.972999000  |
| 6  | 3.205444000  | -1.820608000 | 1.716844000  |
| 6  | 1.845655000  | -1.822012000 | 1.225669000  |
| 14 | 1.731263000  | -0.751476000 | -0.274817000 |
| 6  | 3.533613000  | -0.384807000 | -0.167064000 |
| 1  | 5.161633000  | -1.037775000 | 1.228264000  |
| 1  | 3.533325000  | -2.396898000 | 2.587068000  |
| 15 | 4.488393000  | 0.518600000  | -1.315334000 |
| 15 | 0.556905000  | -2.719897000 | 1.963163000  |
| 14 | 0.103237000  | 0.146223000  | -1.767467000 |
| 14 | -1.624620000 | 0.471132000  | -0.169357000 |
| 6  | -3.428644000 | 0.074404000  | -0.227213000 |
| 6  | -4.121829000 | 0.854794000  | 0.768896000  |
| 6  | -3.324927000 | 1.700874000  | 1.523807000  |
| 6  | -1.918072000 | 1.673240000  | 1.203799000  |
| 1  | -5.195245000 | 0.766926000  | 0.961074000  |
| 1  | -3.747246000 | 2.304583000  | 2.333121000  |
| 15 | -0.829903000 | 2.927128000  | 1.730993000  |
| 15 | -4.287007000 | -0.807574000 | -1.468095000 |
| 6  | 1.176965000  | -4.197475000 | 2.872778000  |
| 1  | 1.754358000  | -4.826395000 | 2.182536000  |
| 1  | 1.830834000  | -3.880132000 | 3.696288000  |
| 1  | 0.335861000  | -4.772955000 | 3.284209000  |
| 6  | -0.637273000 | -3.326340000 | 0.718024000  |
| 1  | -0.990233000 | -2.465270000 | 0.129793000  |
| 1  | -0.130682000 | -4.024697000 | 0.039742000  |
| 1  | -1.490994000 | -3.814982000 | 1.209313000  |
| 6  | -0.458117000 | -1.799165000 | 3.203470000  |
| 1  | -0.936136000 | -0.948958000 | 2.691994000  |
| 1  | -1.231165000 | -2.443018000 | 3.649001000  |
| 1  | 0.207436000  | -1.420579000 | 3.991738000  |
| 6  | 0.901478000  | 2.360594000  | 1.870657000  |
| 1  | 1.544908000  | 3.199482000  | 2.172418000  |
| 1  | 0.973655000  | 1.547214000  | 2.603332000  |
| 1  | 1.227468000  | 1.988789000  | 0.886939000  |
| 6  | -0.786940000 | 4.386576000  | 0.608338000  |
| 1  | -0.141412000 | 5.182358000  | 1.009433000  |
| 1  | -0.400531000 | 4.043840000  | -0.364405000 |



|   |              |              |              |
|---|--------------|--------------|--------------|
| 1 | -1.811586000 | 4.762117000  | 0.481794000  |
| 6 | -1.300077000 | 3.597692000  | 3.383188000  |
| 1 | -0.595194000 | 4.384456000  | 3.686520000  |
| 1 | -2.311604000 | 4.022718000  | 3.335737000  |
| 1 | -1.288758000 | 2.786274000  | 4.122949000  |
| 6 | -4.336674000 | 0.060603000  | -3.089475000 |
| 1 | -3.304938000 | 0.118923000  | -3.468459000 |
| 1 | -4.962324000 | -0.483953000 | -3.812277000 |
| 1 | -4.729382000 | 1.074745000  | -2.936432000 |
| 6 | -3.590173000 | -2.459229000 | -1.822702000 |
| 1 | -2.541840000 | -2.339166000 | -2.151680000 |
| 1 | -3.632754000 | -3.071445000 | -0.911976000 |
| 1 | -4.162388000 | -2.944146000 | -2.627142000 |
| 6 | -6.048615000 | -1.070925000 | -0.997047000 |
| 1 | -6.561153000 | -1.641846000 | -1.783608000 |
| 1 | -6.096337000 | -1.626577000 | -0.051084000 |
| 1 | -6.551250000 | -0.102970000 | -0.870102000 |
| 6 | 4.071454000  | 0.111294000  | -3.051222000 |
| 1 | 4.710805000  | 0.678842000  | -3.743396000 |
| 1 | 4.199621000  | -0.967319000 | -3.208892000 |
| 1 | 3.019891000  | 0.386365000  | -3.226044000 |
| 6 | 4.328438000  | 2.346874000  | -1.193845000 |
| 1 | 4.605651000  | 2.662288000  | -0.178559000 |
| 1 | 4.973696000  | 2.846787000  | -1.931562000 |
| 1 | 3.274004000  | 2.601853000  | -1.390204000 |
| 6 | 6.284282000  | 0.167923000  | -1.105359000 |
| 1 | 6.861620000  | 0.722855000  | -1.857753000 |
| 1 | 6.608163000  | 0.479442000  | -0.103296000 |
| 1 | 6.465168000  | -0.908659000 | -1.222114000 |
| 5 | 0.740825000  | 2.069899000  | -2.201087000 |
| 1 | 1.619863000  | 1.964864000  | -3.052999000 |
| 1 | 1.167128000  | 2.648926000  | -1.201885000 |
| 1 | -0.239746000 | 2.641516000  | -2.661544000 |
| 5 | -0.418440000 | -1.313599000 | -3.113905000 |
| 1 | -0.626545000 | -2.387266000 | -2.554026000 |
| 1 | 0.561090000  | -1.389360000 | -3.846072000 |
| 1 | -1.399168000 | -0.913332000 | -3.737967000 |

**6Ge-(BH<sub>3</sub>)<sub>2</sub>, T. E.= -6818.52563**

|    |              |              |              |
|----|--------------|--------------|--------------|
| 32 | -0.000502000 | -0.000212000 | 1.067091000  |
| 32 | 1.961827000  | 0.000173000  | -0.680945000 |
| 32 | -1.961738000 | -0.000109000 | -0.682561000 |
| 7  | 3.330075000  | -1.268520000 | -0.268553000 |
| 7  | 3.330220000  | 1.268488000  | -0.268353000 |
| 7  | -3.329987000 | -1.268329000 | -0.268527000 |

|   |              |              |              |
|---|--------------|--------------|--------------|
| 7 | -3.329577000 | 1.268690000  | -0.268590000 |
| 6 | 4.537733000  | -0.692215000 | -0.023953000 |
| 1 | 5.424510000  | -1.304625000 | 0.145801000  |
| 6 | 4.537845000  | 0.692043000  | -0.023818000 |
| 1 | 5.424725000  | 1.304281000  | 0.145995000  |
| 6 | -4.536973000 | 0.692519000  | -0.022696000 |
| 1 | -5.423518000 | 1.304985000  | 0.148084000  |
| 6 | -4.537222000 | -0.691779000 | -0.022632000 |
| 1 | -5.423980000 | -1.303913000 | 0.148216000  |
| 6 | 3.184638000  | -2.724898000 | -0.295791000 |
| 6 | 3.184959000  | 2.724868000  | -0.294803000 |
| 6 | -3.184007000 | 2.725049000  | -0.295954000 |
| 6 | -3.184918000 | -2.724726000 | -0.295308000 |
| 1 | 3.529886000  | 3.145559000  | -1.253454000 |
| 1 | -3.528482000 | -3.144969000 | -1.254640000 |
| 1 | -2.130767000 | 2.987956000  | -0.130956000 |
| 1 | 3.519701000  | -3.144030000 | -1.258598000 |
| 1 | 2.130169000  | 2.987585000  | -0.140043000 |
| 1 | 3.769770000  | 3.175381000  | 0.521324000  |
| 1 | -2.130388000 | -2.987659000 | -0.139081000 |
| 1 | -3.771061000 | -3.175446000 | 0.519740000  |
| 1 | 3.778086000  | -3.176577000 | 0.513403000  |
| 1 | 2.131450000  | -2.987909000 | -0.130641000 |
| 1 | -3.519170000 | 3.144130000  | -1.258747000 |
| 1 | -3.777292000 | 3.176844000  | 0.513289000  |
| 5 | -0.000639000 | 2.000703000  | 1.674353000  |
| 1 | 1.024488000  | 2.043129000  | 2.338759000  |
| 1 | -1.026030000 | 2.043471000  | 2.338306000  |
| 1 | -0.000167000 | 2.778339000  | 0.734530000  |
| 5 | -0.000353000 | -2.001240000 | 1.673966000  |
| 1 | -0.000272000 | -2.778728000 | 0.734023000  |
| 1 | -1.025742000 | -2.043934000 | 2.337941000  |
| 1 | 1.024789000  | -2.043942000 | 2.338306000  |

**7Ge-(BH<sub>3</sub>)<sub>2</sub>, T. E.= -8925.05254**

|    |              |              |              |
|----|--------------|--------------|--------------|
| 6  | -4.470021000 | 1.417945000  | 0.348987000  |
| 6  | -3.046015000 | 1.456256000  | 0.996414000  |
| 32 | -2.123119000 | -0.113299000 | 0.094303000  |
| 6  | -3.819325000 | -0.784961000 | -0.765730000 |
| 6  | -4.915315000 | -0.027955000 | 0.038320000  |
| 1  | -4.475904000 | 1.998711000  | -0.591683000 |
| 32 | -0.001124000 | -1.310826000 | -0.002617000 |
| 1  | -5.872960000 | -0.009636000 | -0.510674000 |
| 32 | 2.121531000  | -0.113453000 | -0.095011000 |
| 6  | 3.814643000  | -0.792936000 | 0.764821000  |

|    |              |              |              |
|----|--------------|--------------|--------------|
| 6  | 4.913993000  | -0.041803000 | -0.039937000 |
| 6  | 4.476465000  | 1.406667000  | -0.349380000 |
| 6  | 3.051406000  | 1.453960000  | -0.994089000 |
| 1  | 5.102078000  | -0.569376000 | -0.991797000 |
| 1  | 5.217705000  | 1.888445000  | -1.010836000 |
| 14 | -3.749157000 | -0.254912000 | -2.607097000 |
| 1  | -3.166415000 | 1.121285000  | -2.779535000 |
| 1  | -2.906208000 | -1.216431000 | -3.388216000 |
| 1  | -5.145074000 | -0.240601000 | -3.163315000 |
| 14 | -4.028978000 | -2.679819000 | -0.689515000 |
| 1  | -2.790755000 | -3.379160000 | -1.161614000 |
| 1  | -4.348690000 | -3.091338000 | 0.717046000  |
| 1  | -5.172929000 | -3.095932000 | -1.574269000 |
| 14 | -2.158379000 | 3.092618000  | 0.587698000  |
| 1  | -0.827561000 | 3.166641000  | 1.271957000  |
| 1  | -1.963615000 | 3.216494000  | -0.896499000 |
| 1  | -3.002484000 | 4.249124000  | 1.044973000  |
| 14 | -3.132364000 | 1.242250000  | 2.895108000  |
| 1  | -3.942223000 | 0.034541000  | 3.264958000  |
| 1  | -1.764677000 | 1.127290000  | 3.491423000  |
| 1  | -3.813061000 | 2.454833000  | 3.470294000  |
| 14 | 2.177251000  | 3.096403000  | -0.580170000 |
| 1  | 1.977587000  | 3.215272000  | 0.903767000  |
| 1  | 3.035771000  | 4.245893000  | -1.028175000 |
| 1  | 0.850248000  | 3.188621000  | -1.269671000 |
| 14 | 3.132557000  | 1.244638000  | -2.893559000 |
| 1  | 3.809843000  | 2.459473000  | -3.468095000 |
| 1  | 3.943417000  | 0.038970000  | -3.267793000 |
| 1  | 1.763476000  | 1.128955000  | -3.486432000 |
| 14 | 3.746835000  | -0.261179000 | 2.605827000  |
| 1  | 5.143537000  | -0.244923000 | 3.160016000  |
| 1  | 3.162727000  | 1.114493000  | 2.778061000  |
| 1  | 2.905949000  | -1.222879000 | 3.388976000  |
| 14 | 4.015145000  | -2.688876000 | 0.691000000  |
| 1  | 4.337139000  | -3.103501000 | -0.714120000 |
| 1  | 5.154304000  | -3.109767000 | 1.579700000  |
| 1  | 2.772061000  | -3.381520000 | 1.160189000  |
| 1  | 5.872280000  | -0.028977000 | 0.508090000  |
| 1  | 4.487500000  | 1.987128000  | 0.591456000  |
| 1  | -5.107279000 | -0.554858000 | 0.989774000  |
| 1  | -5.209633000 | 1.903728000  | 1.009323000  |
| 5  | -1.100185000 | -1.848189000 | 1.718859000  |
| 1  | -1.438331000 | -3.005551000 | 1.659920000  |
| 1  | -2.244455000 | -1.214516000 | 1.587796000  |
| 1  | -0.635757000 | -1.397875000 | 2.734841000  |
| 5  | 1.098495000  | -1.844555000 | -1.724815000 |

|   |             |              |              |
|---|-------------|--------------|--------------|
| 1 | 0.633791000 | -1.390816000 | -2.739129000 |
| 1 | 1.435180000 | -3.002503000 | -1.669378000 |
| 1 | 2.242924000 | -1.212302000 | -1.591695000 |

**8Ge-(BH<sub>3</sub>)<sub>2</sub>, T. E.= -6973.27903**

|    |              |              |              |
|----|--------------|--------------|--------------|
| 6  | -3.495900000 | -2.164721000 | -0.363039000 |
| 7  | -2.351410000 | -1.409400000 | -0.732350000 |
| 32 | -1.789334000 | 0.174582000  | 0.035527000  |
| 7  | -3.169685000 | 0.467101000  | 1.229935000  |
| 6  | -4.215234000 | -0.442540000 | 1.352820000  |
| 6  | -4.365969000 | -1.600123000 | 0.662603000  |
| 32 | -0.030322000 | 1.944585000  | -0.692081000 |
| 1  | -4.972998000 | -0.162494000 | 2.091537000  |
| 1  | -5.250262000 | -2.193457000 | 0.897410000  |
| 32 | 1.768684000  | 0.145711000  | -0.136450000 |
| 7  | 2.508952000  | -0.398154000 | 1.465298000  |
| 6  | 3.657406000  | -1.217911000 | 1.628460000  |
| 6  | 4.387848000  | -1.590443000 | 0.422050000  |
| 6  | 4.097710000  | -1.285188000 | -0.867176000 |
| 7  | 3.012529000  | -0.541696000 | -1.320774000 |
| 1  | 5.281148000  | -2.193352000 | 0.588847000  |
| 1  | 4.761507000  | -1.644480000 | -1.660051000 |
| 6  | -3.793940000 | -3.362579000 | -0.940322000 |
| 1  | -4.692510000 | -3.892316000 | -0.627554000 |
| 1  | -3.185164000 | -3.830396000 | -1.709058000 |
| 6  | -1.514950000 | -1.951991000 | -1.804887000 |
| 1  | -1.077636000 | -2.922172000 | -1.513854000 |
| 1  | -2.113877000 | -2.098112000 | -2.718792000 |
| 1  | -0.707518000 | -1.244055000 | -2.038916000 |
| 6  | -3.216342000 | 1.671676000  | 2.072279000  |
| 1  | -3.253722000 | 1.397033000  | 3.138933000  |
| 1  | -2.320306000 | 2.283443000  | 1.902336000  |
| 1  | -4.102551000 | 2.280265000  | 1.829328000  |
| 6  | 1.813872000  | 0.025793000  | 2.683703000  |
| 1  | 2.508854000  | 0.563590000  | 3.349270000  |
| 1  | 0.993778000  | 0.710677000  | 2.425429000  |
| 1  | 1.408717000  | -0.842255000 | 3.231001000  |
| 6  | 2.901076000  | -0.325350000 | -2.770952000 |
| 1  | 3.791681000  | 0.201277000  | -3.150374000 |
| 1  | 2.803986000  | -1.286582000 | -3.301936000 |
| 1  | 2.018453000  | 0.289047000  | -2.993448000 |
| 6  | 4.082856000  | -1.637709000 | 2.852902000  |
| 1  | 4.978488000  | -2.253509000 | 2.920463000  |
| 1  | 3.579437000  | -1.391227000 | 3.783620000  |
| 5  | 0.077313000  | 3.266023000  | 0.926646000  |

|   |              |             |              |
|---|--------------|-------------|--------------|
| 1 | -0.905392000 | 3.949078000 | 0.671523000  |
| 1 | 1.129665000  | 3.832504000 | 0.685623000  |
| 1 | 0.037102000  | 2.715550000 | 2.008083000  |
| 5 | -0.180482000 | 1.903851000 | -2.780386000 |
| 1 | -0.275814000 | 0.786130000 | -3.245115000 |
| 1 | 0.855249000  | 2.487659000 | -3.066523000 |
| 1 | -1.176657000 | 2.594228000 | -2.918350000 |

**9Ge(H)-(BH<sub>3</sub>)<sub>2</sub>, T. E.= -6742.26928**

|    |              |              |              |
|----|--------------|--------------|--------------|
| 6  | -4.137627000 | 0.268089000  | -0.023678000 |
| 7  | -3.430062000 | -0.844374000 | -0.193906000 |
| 32 | -1.758388000 | 0.153427000  | -0.632961000 |
| 7  | -3.423385000 | 1.349293000  | -0.301434000 |
| 32 | 1.760486000  | 0.149409000  | -0.630557000 |
| 7  | 3.435723000  | -0.842581000 | -0.187425000 |
| 6  | 4.139216000  | 0.273400000  | -0.024875000 |
| 7  | 3.419982000  | 1.350398000  | -0.307621000 |
| 6  | -3.921755000 | -2.206474000 | -0.134918000 |
| 1  | -3.210797000 | -2.835986000 | 0.416989000  |
| 1  | -4.896036000 | -2.236478000 | 0.380091000  |
| 1  | -4.042248000 | -2.634334000 | -1.143791000 |
| 6  | -3.791013000 | 2.708535000  | 0.042199000  |
| 1  | -3.237259000 | 3.059848000  | 0.928621000  |
| 1  | -3.565753000 | 3.386697000  | -0.794466000 |
| 1  | -4.869947000 | 2.778271000  | 0.260180000  |
| 6  | 3.780317000  | 2.712663000  | 0.032268000  |
| 1  | 4.858531000  | 2.788038000  | 0.251729000  |
| 1  | 3.553212000  | 3.386991000  | -0.806963000 |
| 1  | 3.223496000  | 3.063972000  | 0.916741000  |
| 6  | 3.935022000  | -2.201897000 | -0.128255000 |
| 1  | 4.911947000  | -2.225723000 | 0.382066000  |
| 1  | 3.230468000  | -2.834450000 | 0.428328000  |
| 1  | 4.053040000  | -2.630931000 | -1.136922000 |
| 1  | 5.186136000  | 0.292671000  | 0.315722000  |
| 1  | -5.183891000 | 0.280902000  | 0.319221000  |
| 32 | -0.000862000 | -0.459426000 | 0.984020000  |
| 1  | 1.733727000  | 0.105484000  | -2.194052000 |
| 1  | -1.729641000 | 0.125140000  | -2.196498000 |
| 5  | 0.003090000  | 0.397396000  | 2.906943000  |
| 1  | -0.010254000 | 1.603987000  | 2.763065000  |
| 1  | 1.032006000  | -0.051205000 | 3.383839000  |
| 1  | -1.010047000 | -0.072653000 | 3.396666000  |
| 5  | -0.013831000 | -2.227384000 | -0.303292000 |
| 1  | -0.048319000 | -3.167435000 | 0.467682000  |
| 1  | -0.998590000 | -2.197958000 | -1.044506000 |

1 0.993624000 -2.239076000 -1.011833000

**9Ge(Me)-(BH<sub>3</sub>)<sub>2</sub>, T. E.= -6820.88782**

6 3.969540000 0.386289000 -0.515861000  
7 3.506395000 -0.817094000 -0.201494000  
32 1.860426000 -0.016855000 0.637802000  
7 3.230698000 1.350508000 0.029124000  
32 -1.859998000 -0.011476000 0.637559000  
7 -3.506025000 -0.821288000 -0.192486000  
6 -3.971117000 0.378721000 -0.516783000  
7 -3.232648000 1.348624000 0.018532000  
6 4.052479000 -2.096830000 -0.607961000  
1 3.265287000 -2.699537000 -1.085094000  
1 4.875046000 -1.952627000 -1.327343000  
1 4.441581000 -2.655408000 0.259177000  
6 3.252103000 2.746222000 -0.375836000  
1 2.410068000 2.966383000 -1.051788000  
1 3.178344000 3.398305000 0.507233000  
1 4.195015000 2.978219000 -0.897923000  
6 -3.255844000 2.740648000 -0.399049000  
1 -4.199112000 2.966623000 -0.923121000  
1 -3.182795000 3.400811000 0.478052000  
1 -2.414030000 2.955565000 -1.076955000  
6 -4.050858000 -2.105238000 -0.587094000  
1 -4.875831000 -1.968317000 -1.305148000  
1 -3.263992000 -2.710304000 -1.061802000  
1 -4.436397000 -2.657544000 0.285630000  
1 -4.842367000 0.550783000 -1.167684000  
1 4.839626000 0.565195000 -1.166466000  
32 -0.000015000 -0.352475000 -1.018252000  
6 -2.184350000 -0.184199000 2.596839000  
1 -1.625770000 0.594850000 3.135164000  
1 -3.255424000 -0.084310000 2.815801000  
1 -1.825951000 -1.166816000 2.935354000  
6 2.186994000 -0.206023000 2.595128000  
1 1.628789000 0.568423000 3.140448000  
1 1.829145000 -1.191489000 2.925833000  
1 3.258272000 -0.107609000 2.813753000  
5 0.001623000 1.395068000 -2.213129000  
1 0.002312000 2.380555000 -1.490363000  
1 -1.015237000 1.286572000 -2.883492000  
1 1.018345000 1.284978000 -2.883406000  
5 -0.001045000 -2.486649000 -1.089138000  
1 -0.001838000 -2.956031000 0.038683000  
1 1.014035000 -2.743755000 -1.720917000

1 -1.015858000 -2.742631000 -1.721818000

**9Ge(Cl)-(BH<sub>3</sub>)<sub>2</sub>, T. E.= -7661.70107**

6 3.976407000 -0.202780000 0.718690000  
7 3.078123000 0.579419000 1.308960000  
32 1.797004000 0.299510000 -0.231213000  
7 3.606351000 -0.528058000 -0.514755000  
32 -1.796707000 0.288513000 0.243502000  
7 -3.606311000 -0.548389000 0.494569000  
6 -3.977926000 -0.170898000 -0.723575000  
7 -3.079651000 0.634383000 -1.281475000  
6 2.999732000 0.863676000 2.732287000  
1 2.291596000 0.183048000 3.231251000  
1 3.992347000 0.747212000 3.196445000  
1 2.664435000 1.898988000 2.883524000  
6 4.375640000 -1.255143000 -1.504208000  
1 3.788573000 -2.095873000 -1.900869000  
1 4.652546000 -0.598175000 -2.344123000  
1 5.297808000 -1.655243000 -1.053126000  
6 -3.006095000 0.986450000 -2.689561000  
1 -3.998396000 0.883853000 -3.157727000  
1 -2.679596000 2.030631000 -2.791911000  
1 -2.293180000 0.336190000 -3.221134000  
6 -4.372345000 -1.322600000 1.450286000  
1 -5.293552000 -1.704871000 0.982143000  
1 -3.782331000 -2.178708000 1.807840000  
1 -4.650784000 -0.705722000 2.319587000  
1 -4.905588000 -0.499116000 -1.216509000  
1 4.902781000 -0.552380000 1.199299000  
32 0.000503000 -1.508030000 -0.032731000  
17 -1.916954000 2.147490000 1.451742000  
17 1.920645000 2.205978000 -1.361875000  
5 -0.406552000 -2.092225000 -2.009325000  
1 -1.502538000 -2.621346000 -1.878774000  
1 0.485843000 -2.903654000 -2.204149000  
1 -0.396344000 -1.144417000 -2.770643000  
5 0.402367000 -2.181386000 1.916317000  
1 0.391599000 -1.270304000 2.721281000  
1 1.497753000 -2.705644000 1.764139000  
1 -0.492453000 -2.998837000 2.070301000

**9Ge(NMe<sub>2</sub>)-(BH<sub>3</sub>)<sub>2</sub>, T. E.= -7010.18631**

6 3.843798000 -0.917858000 0.444530000  
7 2.966584000 -0.611383000 1.403730000

|    |              |              |              |
|----|--------------|--------------|--------------|
| 32 | 1.753070000  | 0.303935000  | 0.063064000  |
| 7  | 3.589358000  | -0.269874000 | -0.679263000 |
| 32 | -1.928726000 | 0.054849000  | -0.167091000 |
| 7  | -2.086750000 | 0.392231000  | 1.831725000  |
| 6  | -2.794968000 | -0.722345000 | 1.995530000  |
| 7  | -3.202348000 | -1.219446000 | 0.836367000  |
| 6  | 2.776807000  | -1.382213000 | 2.622881000  |
| 1  | 1.963014000  | -2.115131000 | 2.500619000  |
| 1  | 3.702130000  | -1.922494000 | 2.881908000  |
| 1  | 2.529305000  | -0.707996000 | 3.455910000  |
| 6  | 4.311831000  | -0.390021000 | -1.931011000 |
| 1  | 3.615473000  | -0.672448000 | -2.734942000 |
| 1  | 4.782974000  | 0.568109000  | -2.203797000 |
| 1  | 5.098004000  | -1.159500000 | -1.857720000 |
| 6  | -3.721889000 | -2.565235000 | 0.650515000  |
| 1  | -4.189922000 | -2.929766000 | 1.579859000  |
| 1  | -4.483130000 | -2.562551000 | -0.142507000 |
| 1  | -2.914139000 | -3.259575000 | 0.367761000  |
| 6  | -1.490660000 | 1.190805000  | 2.883169000  |
| 1  | -1.563341000 | 0.675979000  | 3.855333000  |
| 1  | -0.425411000 | 1.368420000  | 2.666900000  |
| 1  | -1.987397000 | 2.171483000  | 2.971746000  |
| 1  | -2.991692000 | -1.187806000 | 2.973491000  |
| 1  | 4.661845000  | -1.643443000 | 0.572906000  |
| 32 | 0.074688000  | -1.224231000 | -1.088994000 |
| 7  | -2.943013000 | 1.354848000  | -0.978993000 |
| 7  | 1.827070000  | 2.089330000  | 0.555596000  |
| 6  | 0.888797000  | 3.045290000  | -0.024907000 |
| 1  | 1.343467000  | 3.635217000  | -0.844778000 |
| 1  | 0.008997000  | 2.525459000  | -0.434209000 |
| 1  | 0.534295000  | 3.756440000  | 0.744489000  |
| 6  | -4.181749000 | 1.885750000  | -0.430278000 |
| 1  | -5.060479000 | 1.563248000  | -1.022520000 |
| 1  | -4.324355000 | 1.544006000  | 0.604417000  |
| 1  | -4.168928000 | 2.992600000  | -0.427433000 |
| 6  | -2.659607000 | 1.759226000  | -2.355493000 |
| 1  | -3.475014000 | 1.457224000  | -3.040103000 |
| 1  | -2.550738000 | 2.858145000  | -2.425482000 |
| 1  | -1.728399000 | 1.295766000  | -2.713667000 |
| 6  | 3.034348000  | 2.701568000  | 1.097517000  |
| 1  | 3.608637000  | 3.250161000  | 0.324506000  |
| 1  | 2.774072000  | 3.423008000  | 1.894801000  |
| 1  | 3.686015000  | 1.932989000  | 1.535321000  |
| 5  | 0.098685000  | -2.874362000 | 0.228372000  |
| 1  | 1.255581000  | -3.271095000 | 0.185914000  |
| 1  | -0.674022000 | -3.661599000 | -0.299966000 |



|   |              |              |              |
|---|--------------|--------------|--------------|
| 1 | -0.250666000 | -2.528872000 | 1.348430000  |
| 5 | 0.339066000  | -0.657784000 | -3.104512000 |
| 1 | 0.464005000  | 0.552045000  | -3.196135000 |
| 1 | -0.650595000 | -1.097773000 | -3.667921000 |
| 1 | 1.356056000  | -1.274964000 | -3.394604000 |

**9Ge(PMe<sub>2</sub>)-(BH<sub>3</sub>)<sub>2</sub>, T. E.= -7583.47289**

|    |              |              |              |
|----|--------------|--------------|--------------|
| 6  | 4.041109000  | -0.783688000 | -0.892792000 |
| 7  | 3.581427000  | -1.104394000 | 0.306538000  |
| 32 | 1.983715000  | 0.106211000  | 0.083235000  |
| 7  | 3.314450000  | 0.185702000  | -1.450969000 |
| 32 | -1.819585000 | -0.004022000 | -0.003081000 |
| 7  | -2.937107000 | -0.397813000 | 1.641221000  |
| 6  | -3.674194000 | -1.269421000 | 0.955590000  |
| 7  | -3.413958000 | -1.210985000 | -0.344485000 |
| 6  | 4.175703000  | -2.016832000 | 1.261824000  |
| 1  | 3.403650000  | -2.700483000 | 1.643755000  |
| 1  | 4.970842000  | -2.609871000 | 0.781169000  |
| 1  | 4.612734000  | -1.469172000 | 2.113028000  |
| 6  | 3.293552000  | 0.481841000  | -2.874347000 |
| 1  | 2.465567000  | -0.045597000 | -3.375542000 |
| 1  | 3.174171000  | 1.563269000  | -3.034009000 |
| 1  | 4.242655000  | 0.169971000  | -3.341128000 |
| 6  | -3.996160000 | -2.037131000 | -1.383987000 |
| 1  | -4.616398000 | -2.833865000 | -0.941813000 |
| 1  | -4.627517000 | -1.438696000 | -2.061378000 |
| 1  | -3.197099000 | -2.503725000 | -1.979066000 |
| 6  | -2.741981000 | -0.427735000 | 3.081353000  |
| 1  | -3.600634000 | -0.914907000 | 3.572066000  |
| 1  | -1.826134000 | -0.984197000 | 3.338427000  |
| 1  | -2.659820000 | 0.597609000  | 3.469500000  |
| 1  | -4.387798000 | -1.970822000 | 1.414224000  |
| 1  | 4.901703000  | -1.268668000 | -1.379232000 |
| 32 | 0.133304000  | -1.578466000 | -0.278224000 |
| 15 | -2.409763000 | 2.247761000  | -0.487587000 |
| 15 | 2.633247000  | 2.020698000  | 1.372204000  |
| 6  | 1.175902000  | 2.084506000  | 2.564561000  |
| 1  | 0.199750000  | 2.088495000  | 2.056769000  |
| 1  | 1.221768000  | 1.226945000  | 3.250143000  |
| 1  | 1.261716000  | 3.003880000  | 3.163568000  |
| 6  | -4.284133000 | 2.167274000  | -0.614249000 |
| 1  | -4.636277000 | 1.414132000  | -1.332847000 |
| 1  | -4.699850000 | 1.940473000  | 0.377058000  |
| 1  | -4.656568000 | 3.156404000  | -0.921226000 |
| 6  | -1.933773000 | 2.304112000  | -2.310989000 |

|   |              |              |              |
|---|--------------|--------------|--------------|
| 1 | -2.466218000 | 1.567804000  | -2.928822000 |
| 1 | -2.151371000 | 3.312824000  | -2.692499000 |
| 1 | -0.854118000 | 2.128335000  | -2.415919000 |
| 6 | 2.087680000  | 3.356167000  | 0.155265000  |
| 1 | 1.047710000  | 3.250412000  | -0.188286000 |
| 1 | 2.185278000  | 4.329890000  | 0.658814000  |
| 1 | 2.763027000  | 3.357888000  | -0.711402000 |
| 5 | 0.103896000  | -1.927819000 | -2.370161000 |
| 1 | -0.789966000 | -2.755668000 | -2.487664000 |
| 1 | 1.208567000  | -2.404847000 | -2.589443000 |
| 1 | -0.111585000 | -0.889972000 | -2.974236000 |
| 5 | 0.192817000  | -2.549008000 | 1.610983000  |
| 1 | 1.079243000  | -3.376433000 | 1.456872000  |
| 1 | -0.915200000 | -3.060995000 | 1.704379000  |
| 1 | 0.428528000  | -1.744427000 | 2.50012600   |

**10Ge(H)-(BH<sub>3</sub>)<sub>2</sub>, T. E.= -7964.77878**

|    |              |              |              |
|----|--------------|--------------|--------------|
| 6  | 4.417056000  | -0.693806000 | -1.157360000 |
| 6  | 4.417869000  | 0.693461000  | -1.155318000 |
| 6  | 3.229455000  | 1.314421000  | -0.646333000 |
| 32 | 1.903919000  | -0.000193000 | -0.172584000 |
| 6  | 3.227812000  | -1.314989000 | -0.650583000 |
| 1  | 5.274079000  | -1.257405000 | -1.536638000 |
| 1  | 5.275444000  | 1.257219000  | -1.533078000 |
| 15 | 2.973151000  | -2.984823000 | -0.306259000 |
| 1  | 1.731501000  | -3.153739000 | 0.375715000  |
| 1  | 2.930979000  | -3.938029000 | -1.386371000 |
| 15 | 2.974744000  | 2.984053000  | -0.301090000 |
| 1  | 1.733679000  | 3.152176000  | 0.382110000  |
| 1  | 3.950223000  | 3.631592000  | 0.527956000  |
| 32 | -0.000217000 | -0.001447000 | 1.462007000  |
| 32 | -1.903076000 | 0.000554000  | -0.174653000 |
| 6  | -3.227805000 | 1.315900000  | -0.649319000 |
| 6  | -4.417641000 | 0.695394000  | -1.155378000 |
| 6  | -4.418587000 | -0.691880000 | -1.154668000 |
| 6  | -3.229558000 | -1.313463000 | -0.648019000 |
| 1  | -5.274937000 | 1.259521000  | -1.533248000 |
| 1  | -5.276685000 | -1.255173000 | -1.531959000 |
| 15 | -2.976135000 | -2.983139000 | -0.301838000 |
| 1  | -3.952084000 | -3.629133000 | 0.527814000  |
| 1  | -2.933946000 | -3.937649000 | -1.380834000 |
| 15 | -2.971716000 | 2.985556000  | -0.305242000 |
| 1  | -1.730024000 | 3.153375000  | 0.376942000  |
| 1  | -2.928643000 | 3.938809000  | -1.385313000 |
| 1  | -1.734943000 | -3.152315000 | 0.380958000  |

|   |              |              |              |
|---|--------------|--------------|--------------|
| 1 | -3.946011000 | 3.634159000  | 0.524353000  |
| 1 | 3.947972000  | -3.632605000 | 0.523375000  |
| 1 | 2.931227000  | 3.937941000  | -1.380567000 |
| 5 | 0.000026000  | 2.036929000  | 2.086284000  |
| 1 | 1.020852000  | 2.207583000  | 2.733540000  |
| 1 | -1.021345000 | 2.208036000  | 2.732517000  |
| 1 | 0.000720000  | 2.734461000  | 1.060574000  |
| 5 | -0.001228000 | -2.040521000 | 2.083653000  |
| 1 | -0.000959000 | -2.737529000 | 1.057591000  |
| 1 | -1.022844000 | -2.211340000 | 2.729681000  |
| 1 | 1.019445000  | -2.212178000 | 2.730844000  |

**10Ge(Me)-(BH<sub>3</sub>)<sub>2</sub>, T. E.= -8436.50711**

|    |              |              |              |
|----|--------------|--------------|--------------|
| 6  | -3.917174000 | 1.270709000  | 1.222699000  |
| 6  | -2.924967000 | 2.016656000  | 1.844463000  |
| 6  | -1.596820000 | 1.871859000  | 1.319238000  |
| 32 | -1.592158000 | 0.602551000  | -0.139031000 |
| 6  | -3.498278000 | 0.428096000  | 0.137780000  |
| 1  | -4.953281000 | 1.323928000  | 1.570732000  |
| 1  | -3.162409000 | 2.658326000  | 2.698607000  |
| 15 | -4.621902000 | -0.385365000 | -0.919692000 |
| 15 | -0.244383000 | 2.842990000  | 1.821711000  |
| 32 | -0.084415000 | -0.114593000 | -2.027403000 |
| 32 | 1.697759000  | -1.031890000 | -0.440445000 |
| 6  | 3.437647000  | -0.313564000 | 0.025091000  |
| 6  | 3.825577000  | -0.746342000 | 1.336055000  |
| 6  | 2.903978000  | -1.529507000 | 2.024437000  |
| 6  | 1.685047000  | -1.820678000 | 1.331016000  |
| 1  | 4.813512000  | -0.547148000 | 1.764976000  |
| 1  | 3.152182000  | -1.943208000 | 3.007800000  |
| 15 | 0.407487000  | -2.808309000 | 1.973080000  |
| 15 | 4.507716000  | 0.555209000  | -1.041967000 |
| 6  | 0.426414000  | 3.893383000  | 0.472736000  |
| 1  | 0.700128000  | 3.250219000  | -0.380570000 |
| 1  | -0.361829000 | 4.583572000  | 0.142630000  |
| 1  | 1.304993000  | 4.462114000  | 0.813182000  |
| 6  | 1.191264000  | 1.886683000  | 2.456663000  |
| 1  | 1.529253000  | 1.169722000  | 1.692300000  |
| 1  | 2.020464000  | 2.560732000  | 2.717375000  |
| 1  | 0.878610000  | 1.324693000  | 3.346327000  |
| 6  | -0.705839000 | 4.000694000  | 3.178703000  |
| 1  | -1.050906000 | 3.429854000  | 4.051182000  |
| 1  | 0.163249000  | 4.610009000  | 3.463143000  |
| 1  | -1.515748000 | 4.659813000  | 2.839324000  |
| 6  | -4.306700000 | -2.180357000 | -1.116650000 |

|   |              |              |              |
|---|--------------|--------------|--------------|
| 1 | -5.048945000 | -2.627013000 | -1.794785000 |
| 1 | -3.299681000 | -2.312199000 | -1.548633000 |
| 1 | -4.358486000 | -2.664653000 | -0.132318000 |
| 6 | -4.638284000 | 0.277713000  | -2.635005000 |
| 1 | -4.805407000 | 1.362168000  | -2.595992000 |
| 1 | -3.654318000 | 0.072302000  | -3.084085000 |
| 1 | -5.420645000 | -0.207484000 | -3.237784000 |
| 6 | -6.353399000 | -0.228088000 | -0.308914000 |
| 1 | -6.432114000 | -0.657156000 | 0.698814000  |
| 1 | -6.636479000 | 0.832181000  | -0.270592000 |
| 1 | -7.034961000 | -0.760683000 | -0.986457000 |
| 6 | 4.445285000  | 2.393393000  | -0.885927000 |
| 1 | 4.626905000  | 2.671814000  | 0.161165000  |
| 1 | 5.196241000  | 2.869900000  | -1.533280000 |
| 1 | 3.437990000  | 2.714722000  | -1.190017000 |
| 6 | 6.279571000  | 0.129369000  | -0.745135000 |
| 1 | 6.925295000  | 0.673824000  | -1.448697000 |
| 1 | 6.559342000  | 0.399952000  | 0.282010000  |
| 1 | 6.416193000  | -0.952052000 | -0.876888000 |
| 6 | 4.163815000  | 0.208386000  | -2.800823000 |
| 1 | 3.136719000  | 0.537305000  | -3.034503000 |
| 1 | 4.869989000  | 0.763571000  | -3.435354000 |
| 1 | 4.258947000  | -0.869728000 | -2.983048000 |
| 6 | 1.038517000  | -4.166689000 | 3.052677000  |
| 1 | 1.730197000  | -4.791464000 | 2.472351000  |
| 1 | 1.581309000  | -3.736639000 | 3.905571000  |
| 1 | 0.208791000  | -4.781484000 | 3.429900000  |
| 6 | -0.823469000 | -1.925676000 | 3.029674000  |
| 1 | -1.594294000 | -2.618143000 | 3.398702000  |
| 1 | -0.297658000 | -1.473206000 | 3.881865000  |
| 1 | -1.290267000 | -1.126937000 | 2.432032000  |
| 6 | -0.550298000 | -3.605823000 | 0.636632000  |
| 1 | 0.091430000  | -4.330641000 | 0.119015000  |
| 1 | -1.431876000 | -4.115217000 | 1.051418000  |
| 1 | -0.870607000 | -2.850534000 | -0.098220000 |
| 5 | -1.065968000 | -1.730144000 | -2.959715000 |
| 1 | -1.413573000 | -2.581013000 | -2.147289000 |
| 1 | -0.241839000 | -2.167464000 | -3.747775000 |
| 1 | -2.025907000 | -1.229260000 | -3.538584000 |
| 5 | 0.789982000  | 1.671040000  | -2.770678000 |
| 1 | 1.509526000  | 2.189109000  | -1.921858000 |
| 1 | -0.155468000 | 2.382113000  | -3.073283000 |
| 1 | 1.422353000  | 1.313582000  | -3.757769000 |
